# Supplementary material
Source: Royal Society of Chemistry journal article supplement (doi:10.1039/d5va00328h)
Supplement: d5va00328h1.xlsx [file d5va00328h1.xlsx]

## Sheet: PubMed
((TITLE-ABS ("toxicity") OR TITLE-ABS ("toxicology") OR TITLE-ABS ("chemoinformatics") OR TITLE-ABS ("cheminformatics") OR TITLE-ABS ("QSAR") OR TITLE-ABS ("QSPR") OR TITLE-ABS ("machine learning") OR TITLE-ABS ("modeling")) AND (TITLE-ABS ("PFAS") OR TITLE-ABS ("PFOA") OR TITLE-ABS ("PFOS")) AND ( PUBYEAR > 2019 AND PUBYEAR < 2023 ) AND PUBYEAR > 2019 AND PUBYEAR < 2023 AND PUBYEAR > 2019 AND PU…
1,869 records
Title	Authors	Journal	DOI
(1) H-Nuclear Magnetic Resonance Metabolomics Analysis of Arabidopsis thaliana Exposed to Perfluorooctanoic Acid and Perfluoroctanesulfonic Acid	O'Hara L, Longstaffe JG.	Environmental toxicology and chemistry	10.1002/etc.5547
(13)C isotope-based metabolic flux analysis revealing cellular landscape of glucose metabolism in human liver cells exposed to perfluorooctanoic acid	Zhang R, Chen B, Lin L, Zhang H, Luan T.	The Science of the total environment	10.1016/j.scitotenv.2021.145329
1α,25-dihydroxyvitamin D(3) supplementation alleviates perfluorooctanesulfonate acid-induced reproductive injury in male mice: Modulation of Nrf2 mediated oxidative stress response	Liang Y, Lu J, Yi W, Cai M, Shi W, Li B, Zhang Z, Jiang F.	Environmental toxicology	10.1002/tox.23685
20th Pollutant Responses in Marine Organisms (PRIMO 20): Global issues and fundamental mechanisms caused by pollutant stress in marine and freshwater organisms	Baldwin WS, Bain LJ, Di Giulio R, Kullman S, Rice CD, Ringwood AH, den Hurk PV.	Aquatic toxicology (Amsterdam, Netherlands)	10.1016/j.aquatox.2020.105620
6:2 Chlorinated Polyfluoroalkyl Ether Sulfonates Exert Stronger Thyroid Homeostasis Disruptive Effects in Newborns than Perfluorooctanesulfonate: Evidence Based on Bayesian Benchmark Dose Values from a Population Study	Liu X, Zhang L, Liu J, Zaya G, Wang Y, Xiang Q, Li J, Wu Y.	Environmental science & technology	10.1021/acs.est.3c03952
6:2 Cl-PFESA has the potential to cause liver damage and induce lipid metabolism disorders in female mice through the action of PPAR-γ	Pan Z, Miao W, Wang C, Tu W, Jin C, Jin Y.	Environmental pollution (Barking, Essex : 1987)	10.1016/j.envpol.2021.117329
8:8 Perfluoroalkyl phosphinic acid affects neurobehavioral development, thyroid disruption, and DNA methylation in developing zebrafish	Kim S, Stroski KM, Killeen G, Smitherman C, Simcik MF, Brooks BW.	The Science of the total environment	10.1016/j.scitotenv.2020.139600
A case-control study of perfluoroalkyl substances and the risk of breast cancer in Taiwanese women	Tsai MS, Chang SH, Kuo WH, Kuo CH, Li SY, Wang MY, Chang DY, Lu YS, Huang CS, Cheng AL, Lin CH, Chen PC.	Environment international	10.1016/j.envint.2020.105850
A Chemical Category-Based Prioritization Approach for Selecting 75 Per- and Polyfluoroalkyl Substances (PFAS) for Tiered Toxicity and Toxicokinetic Testing	Patlewicz G, Richard AM, Williams AJ, Grulke CM, Sams R, Lambert J, Noyes PD, DeVito MJ, Hines RN, Strynar M, Guiseppi-Elie A, Thomas RS.	Environmental health perspectives	10.1289/EHP4555
A chemical kinetic model for the decomposition of perfluorinated sulfonic acids	Altarawneh M.	Chemosphere	10.1016/j.chemosphere.2020.128256
A comprehensive analysis of evolution and underlying connections of water research themes in the 21st century	Chen X, Chen H, Yang L, Wei W, Ni BJ.	The Science of the total environment	10.1016/j.scitotenv.2022.155411
A comprehensive untargeted metabolomics study in zebrafish embryos exposed to perfluorohexane sulfonate (PFHxS)	Xu M, Legradi J, Leonards P.	The Science of the total environment	10.1016/j.scitotenv.2023.163770
A co-twin control study of in utero exposure to poly- and perfluoroalkyl substances and associations with neonatal thyroid-stimulating hormone	Hu L, Mei H, Cai X, Xiang F, Li N, Huang Z, Duan Z, Yang P, Xiao H.	Environmental research	10.1016/j.envres.2023.117350
A Critical Review of Amphibian Per- and Polyfluoroalkyl Substance Ecotoxicity Research Studies: Identification of Screening Levels in Water and Other Useful Resources for Site-Specific Ecological Risk Assessments	Pandelides Z, Conder J, Choi Y, Allmon E, Hoskins T, Lee L, Hoverman J, Sepúlveda M.	Environmental toxicology and chemistry	10.1002/etc.5695
A critical review of modeling Poly- and Perfluoroalkyl Substances (PFAS) in the soil-water environment	Sima MW, Jaffé PR.	The Science of the total environment	10.1016/j.scitotenv.2020.143793
A critical review of perfluoroalkyl and polyfluoroalkyl substances (PFAS) landfill disposal in the United States	Tolaymat T, Robey N, Krause M, Larson J, Weitz K, Parvathikar S, Phelps L, Linak W, Burden S, Speth T, Krug J.	The Science of the total environment	10.1016/j.scitotenv.2023.167185
A critical review of the application of polymer of low concern regulatory criteria to fluoropolymers II: Fluoroplastics and fluoroelastomers	Korzeniowski SH, Buck RC, Newkold RM, Kassmi AE, Laganis E, Matsuoka Y, Dinelli B, Beauchet S, Adamsky F, Weilandt K, Soni VK, Kapoor D, Gunasekar P, Malvasi M, Brinati G, Musio S.	Integrated environmental assessment and management	10.1002/ieam.4646
A cross-sectional study of the association between perfluorinated chemical exposure and cancers related to deregulation of estrogen receptors	Omoike OE, Pack RP, Mamudu HM, Liu Y, Wang L.	Environmental research	10.1016/j.envres.2020.110329
A field study to assess the role of air-water interfacial sorption on PFAS leaching in an AFFF source area	Schaefer CE, Lavorgna GM, Lippincott DR, Nguyen D, Christie E, Shea S, O'Hare S, Lemes MCS, Higgins CP, Field J.	Journal of contaminant hydrology	10.1016/j.jconhyd.2022.104001
A highly sensitive dual-readout assay for perfluorinated compounds based CdTe quantum dots	Zhang F, Liang J, Liu Y, Zhou Q, Hong Y, Chen X, Tan K.	Spectrochimica acta. Part A, Molecular and biomolecular spectroscopy	10.1016/j.saa.2021.120753
A High-Throughput Toxicity Screen of 42 Per- and Polyfluoroalkyl Substances (PFAS) and Functional Assessment of Migration and Gene Expression in Human Placental Trophoblast Cells	Blake BE, Rickard BP, Fenton SE.	Frontiers in toxicology	10.3389/ftox.2022.881347
A human relevant mixture of persistent organic pollutants (POPs) and perfluorooctane sulfonic acid (PFOS) differentially affect glutamate induced excitotoxic responses in chicken cerebellum granule neurons (CGNs) in vitro	Yadav A, Verhaegen S, Verbruggen E, Kerhoas M, Willemijn Huiberts EH, Hadera MG, Berntsen HF, Zimmer KE, Ropstad E, Paulsen RE.	Reproductive toxicology (Elmsford, N.Y.)	10.1016/j.reprotox.2021.01.008
A human relevant mixture of persistent organic pollutants (POPs) and perfluorooctane sulfonic acid (PFOS) enhance nerve growth factor (NGF)-induced neurite outgrowth in PC12 cells	Yadav A, Amber M, Zosen D, Labba NA, Huiberts EHW, Samulin Erdem J, Haugen F, Berntsen HF, Zienolddiny S, Paulsen RE, Ropstad E, Connolly L, Verhaegen S.	Toxicology letters	10.1016/j.toxlet.2020.12.007
A machine learning approach for prioritizing groundwater testing for per-and polyfluoroalkyl substances (PFAS)	George S, Dixit A.	Journal of environmental management	10.1016/j.jenvman.2021.113359
A Machine Learning Model to Estimate Toxicokinetic Half-Lives of Per- and Polyfluoro-Alkyl Substances (PFAS) in Multiple Species	Dawson DE, Lau C, Pradeep P, Sayre RR, Judson RS, Tornero-Velez R, Wambaugh JF.	Toxics	10.3390/toxics11020098
A modular mechanistic framework for estimating exposure to SVOCs: Next steps for modeling emission and partitioning of plasticizers and PFAS	Eichler CMA, Bi C, Wang C, Little JC.	Journal of exposure science & environmental epidemiology	10.1038/s41370-022-00419-8
A mortality study on male subjects exposed to polyfluoroalkyl acids with high internal dose of perfluorooctanoic acid	Girardi P, Merler E.	Environmental research	10.1016/j.envres.2019.108743
A New CSRML Structure-Based Fingerprint Method for Profiling and Categorizing Per- and Polyfluoroalkyl Substances (PFAS)	Richard AM, Lougee R, Adams M, Hidle H, Yang C, Rathman J, Magdziarz T, Bienfait B, Williams AJ, Patlewicz G.	Chemical research in toxicology	10.1021/acs.chemrestox.2c00403
A new framework for modeling the effect of salt on interfacial adsorption of PFAS in environmental systems	Le ST, Gao Y, Kibbey TCG, Glamore WC, O'Carroll DM.	The Science of the total environment	10.1016/j.scitotenv.2021.148893
A new mechanistic insight into the association between environmental perfluorooctane sulfonic acid (PFOS) exposure and attention deficit and hyperactivity disorder (ADHD)-like behavior	Zhang M, Gu X, Wu L, Wan N, Liu Y, Xin Z, Chen T, Liu S, Li M, Deng M, Wang Q.	Neurotoxicology	10.1016/j.neuro.2023.11.004
A New Method for Environmental Risk Assessment of Pollutants Based on Multi-Dimensional Risk Factors	Li L, Dong Y, Chen Y, Jiao J, Zou X.	Toxics	10.3390/toxics10110659
A New OECD Definition for Per- and Polyfluoroalkyl Substances	Wang Z, Buser AM, Cousins IT, Demattio S, Drost W, Johansson O, Ohno K, Patlewicz G, Richard AM, Walker GW, White GS, Leinala E.	Environmental science & technology	10.1021/acs.est.1c06896
A Pathology Review of the Lower Gastrointestinal Tract in Relation to Ulcerative Colitis in Rats and Cynomolgus Macaques Treated With Ammonium Perfluorooctanoate	Chang S, Parker GA, Kleinschmidt SE, Olsen GW, Ley CA, Taiwo OA.	Toxicologic pathology	10.1177/0192623320911606
A Probabilistic Approach to Evaluate the Risk of Decreased Total Triiodothyronine Hormone Levels following Chronic Exposure to PFOS and PFHxS via Contaminated Drinking Water	Silva AV, Ringblom J, Lindh C, Scott K, Jakobsson K, Öberg M.	Environmental health perspectives	10.1289/EHP6654
A proposed approach to defining per- and polyfluoroalkyl substances (PFAS) based on molecular structure and formula	Gaines LGT, Sinclair G, Williams AJ.	Integrated environmental assessment and management	10.1002/ieam.4735
A prospective nested case-control study of serum concentrations of per- and polyfluoroalkyl substances and aggressive prostate cancer risk	Rhee J, Barry KH, Huang WY, Sampson JN, Hofmann JN, Silverman DT, Calafat AM, Botelho JC, Kato K, Purdue MP, Berndt SI.	Environmental research	10.1016/j.envres.2023.115718
A putative adverse outcome network for neonatal mortality and lower birth weight in rodents: Applicability to per- and polyfluoroalkyl substances and relevance to human health	Rogers JM, Heintz MM, Thompson CM, Haws LC.	Birth defects research	10.1002/bdr2.2185
A rapid assessment bioaccumulation screening (RABS) study design for emerging per-and polyfluoroalkyl substances in mice exposed to industrially impacted surface water	Bangma J, Guillette TC, Strynar M, Lindstrom A, McCord J, Hill D, Lau C, Chernoff N, Lang JR.	Chemosphere	10.1016/j.chemosphere.2022.136159
A rapid method for the detection and quantification of legacy and emerging per- and polyfluoroalkyl substances (PFAS) in bird feathers using UPLC-MS/MS	Groffen T, Bervoets L, Jeong Y, Willems T, Eens M, Prinsen E.	Journal of chromatography. B, Analytical technologies in the biomedical and life sciences	10.1016/j.jchromb.2021.122653
A ReaxFF-based molecular dynamics study of the destruction of PFAS due to ultrasound	Bezerra de Souza B, Aluthgun Hewage S, A Kewalramani J, Ct van Duin A, N Meegoda J.	Environmental pollution (Barking, Essex : 1987)	10.1016/j.envpol.2023.122026
A regional numerical environmental multimedia modeling approach to assess spatial Eco-Environmental exposure risk of perfluorooctane sulfonate (PFOS) in the Pearl river basin	Chen Z, Dong J, Asif Z.	Environment international	10.1016/j.envint.2022.107101
A review of cardiovascular effects and underlying mechanisms of legacy and emerging per- and polyfluoroalkyl substances (PFAS)	Wen ZJ, Wei YJ, Zhang YF, Zhang YF.	Archives of toxicology	10.1007/s00204-023-03477-5
A review of microbial degradation of per- and polyfluoroalkyl substances (PFAS): Biotransformation routes and enzymes	Berhanu A, Mutanda I, Taolin J, Qaria MA, Yang B, Zhu D.	The Science of the total environment	10.1016/j.scitotenv.2022.160010
A review of omics-based PFAS exposure studies reveals common biochemical response pathways	Beale DJ, Sinclair GM, Shah R, Paten AM, Kumar A, Long SM, Vardy S, Jones OAH.	The Science of the total environment	10.1016/j.scitotenv.2022.157255
A review of PFAS adsorption from aqueous solutions: Current approaches, engineering applications, challenges, and opportunities	Lei X, Lian Q, Zhang X, Karsili TK, Holmes W, Chen Y, Zappi ME, Gang DD.	Environmental pollution (Barking, Essex : 1987)	10.1016/j.envpol.2023.121138
A Review of PFAS Destruction Technologies	Meegoda JN, Bezerra de Souza B, Casarini MM, Kewalramani JA.	International journal of environmental research and public health	10.3390/ijerph192416397
A review of recent studies on toxicity, sequestration, and degradation of per- and polyfluoroalkyl substances (PFAS)	Dickman RA, Aga DS.	Journal of hazardous materials	10.1016/j.jhazmat.2022.129120
A review of sources, multimedia distribution and health risks of novel fluorinated alternatives	Wang Y, Chang W, Wang L, Zhang Y, Zhang Y, Wang M, Wang Y, Li P.	Ecotoxicology and environmental safety	10.1016/j.ecoenv.2019.109402
A review on per- and polyfluorinated alkyl substances (PFASs) in microplastic and food-contact materials	Barhoumi B, Sander SG, Tolosa I.	Environmental research	10.1016/j.envres.2021.112595
A revised concept for deriving reference values for internal exposures to chemical substances and its application to population-representative biomonitoring data in German children and adolescents 2014-2017 (GerES V)	Hoopmann M, Murawski A, Schümann M, Göen T, Apel P, Vogel N, Kolossa-Gehring M, Röhl C; Human Biomonitoring Commission of the German Environment Agency.	International journal of hygiene and environmental health	10.1016/j.ijheh.2023.114236
A Roadmap to the Structure-Related Metabolism Pathways of Per- and Polyfluoroalkyl Substances in the Early Life Stages of Zebrafish (Danio rerio)	Han J, Gu W, Barrett H, Yang D, Tang S, Sun J, Liu J, Krause HM, Houck KA, Peng H.	Environmental health perspectives	10.1289/EHP7169
A Scoping Assessment of Implemented Toxicokinetic Models of Per- and Polyfluoro-Alkyl Substances, with a Focus on One-Compartment Models	East A, Dawson DE, Brady S, Vallero DA, Tornero-Velez R.	Toxics	10.3390/toxics11020163
A Statistical Approach for Identifying Private Wells Susceptible to Perfluoroalkyl Substances (PFAS) Contamination	Hu XC, Ge B, Ruyle BJ, Sun J, Sunderland EM.	Environmental science & technology letters	10.1021/acs.estlett.1c00264
A study on the effectiveness of sodium selenite in treating cadmium and perfluoro octane sulfonic (PFOS) poisoned zebrafish (Danio rerio)	Lu W, Ahmed W, Mahmood M, Wenjie O, Jiannan L, Yunting W, Jie Y, Wenxin X, Xiuxian F, Zhao H, Liu W, Li W, Mehmood S.	Biological trace element research	10.1007/s12011-023-03654-8
A systematic evidence map of chronic inflammation and immunosuppression related to per- and polyfluoroalkyl substance (PFAS) exposure	Zhang L, Louie A, Rigutto G, Guo H, Zhao Y, Ahn S, Dahlberg S, Sholinbeck M, Smith MT.	Environmental research	10.1016/j.envres.2022.115188
Aberrant hepatic lipid metabolism associated with gut microbiota dysbiosis triggers hepatotoxicity of novel PFOS alternatives in adult zebrafish	Wang Q, Huang J, Liu S, Wang C, Jin Y, Lai H, Tu W.	Environment international	10.1016/j.envint.2022.107351
Absorption and elimination of per and poly-fluoroalkyl substances substitutes in salmonid species after pre-fertilization exposure	Su S, Jones PD, Raine JC, Yang Z, Gong Y, Xie Y, Tang J, Wang C, Zhao X, Giesy JP.	The Science of the total environment	10.1016/j.scitotenv.2021.152547
Absorption, distribution, and toxicity of per- and polyfluoroalkyl substances (PFAS) in the brain: a review	Cao Y, Ng C.	Environmental science. Processes & impacts	10.1039/d1em00228g
Accumulation and associated phytotoxicity of novel chlorinated polyfluorinated ether sulfonate in wheat seedlings	Lin Q, Zhou C, Chen L, Li Y, Huang X, Wang S, Qiu R, Tang C.	Chemosphere	10.1016/j.chemosphere.2020.126447
Accumulation and effects of perfluoroalkyl substances in Arabidopsis thaliana in a temperature-dependent manner: an in vitro study	Groffen T, Oden S, Claeijs N, Willems T, Schoenaers S, Vissenberg K, Bervoets L, Eens M, Prinsen E.	Environmental science and pollution research international	10.1007/s11356-023-27237-1
Accumulation and effects of perfluoroalkyl substances in three hydroponically grown Salix L. species	Sharma N, Barion G, Shrestha I, Ebinezer LB, Trentin AR, Vamerali T, Mezzalira G, Masi A, Ghisi R.	Ecotoxicology and environmental safety	10.1016/j.ecoenv.2019.110150
Accumulation and glucocorticoid signaling suppression by four emerging perfluoroethercarboxylic acids based on animal exposure and cell testing	Zhang F, Liu L, Hu J, Fu H, Li H, Chen J, Yang C, Guo Q, Liang X, Wang L, Guo Y, Dai J, Sheng N, Wang J.	Environment international	10.1016/j.envint.2023.108092
Accumulation and phytotoxicity of perfluorooctanoic acid and 2,3,3,3-tetrafluoro-2-(heptafluoropropoxy)propanoate in Arabidopsis thaliana and Nicotiana benthamiana	Chen CH, Yang SH, Liu Y, Jamieson P, Shan L, Chu KH.	Environmental pollution (Barking, Essex : 1987)	10.1016/j.envpol.2019.113817
Accumulation, biodegradation and toxicological effects of N-ethyl perfluorooctane sulfonamidoethanol on the earthworms Eisenia fetida exposed to quartz sands	Zhao S, Liu T, Wang B, Fu J, Liang T, Zhong Z, Zhan J, Liu L.	Ecotoxicology and environmental safety	10.1016/j.ecoenv.2019.05.062
Accumulation, Biotransformation, and Endocrine Disruption Effects of Fluorotelomer Surfactant Mixtures on Zebrafish	Shi G, Cui Q, Zhang H, Cui R, Guo Y, Dai J.	Chemical research in toxicology	10.1021/acs.chemrestox.9b00127
Activation of AMPKα2 attenuated doxorubicin-induced cardiotoxicity via inhibiting lipid peroxidation associated ferroptosis	Liao HH, Ding W, Zhang N, Zhou ZY, Ling Z, Li WJ, Chen S, Tang QZ.	Free radical biology & medicine	10.1016/j.freeradbiomed.2023.06.004
Activation of estrogen-related receptor: An alternative mechanism of hexafluoropropylene oxide homologs estrogenic effects	Chen L, Lin X, Shi S, Li M, Mortimer M, Fang W, Li F, Guo LH.	The Science of the total environment	10.1016/j.scitotenv.2023.166257
Activation of human nuclear receptors by perfluoroalkylated substances (PFAS)	Behr AC, Plinsch C, Braeuning A, Buhrke T.	Toxicology in vitro : an international journal published in association with BIBRA	10.1016/j.tiv.2019.104700
Acute and chronic effects of perfluoroalkyl substance mixtures on larval American bullfrogs (Rana catesbeiana)	Flynn RW, Chislock MF, Gannon ME, Bauer SJ, Tornabene BJ, Hoverman JT, Sepúlveda MS.	Chemosphere	10.1016/j.chemosphere.2019.124350
Acute Exposure of Zebrafish (Danio rerio) to the Next-Generation Perfluoroalkyl Substance, Perfluoroethylcyclohexanesulfonate, Shows Similar Effects as Legacy Substances	Mahoney H, Cantin J, Rybchuk J, Xie Y, Giesy JP, Brinkmann M.	Environmental science & technology	10.1021/acs.est.2c08463
Acute exposure to environmentally relevant concentrations of Chinese PFOS alternative F-53B induces oxidative stress in early developing zebrafish	Wu Y, Huang J, Deng M, Jin Y, Yang H, Liu Y, Cao Q, Mennigen JA, Tu W.	Chemosphere	10.1016/j.chemosphere.2019.07.016
Acute exposure to perfluorooctane sulfonate exacerbates heat-induced oxidative stress in a tropical coral species	Bednarz VN, Choyke S, Marangoni LFB, Otto EI, Béraud E, Metian M, Tolosa I, Ferrier-Pagès C.	Environmental pollution (Barking, Essex : 1987)	10.1016/j.envpol.2022.119054
Acute Oral Toxicity of Nonfluorinated Fire-Fighting Foams to Northern Bobwhite Quail (Colinus virginianus)	Hossain F, Dennis NM, Subbiah S, Karnjanapiboonwong A, Guelfo JL, Suski J, Anderson TA.	Environmental toxicology and chemistry	10.1002/etc.5398
Acute toxicity and risk assessment of perfluorooctanoic acid (PFOA) and perfluorooctanesulfonate (PFOS) in tropical cladocerans Moina micrura	Razak MR, Aris AZ, Zainuddin AH, Yusoff FM, Balia Yusof ZN, Kim SD, Kim KW.	Chemosphere	10.1016/j.chemosphere.2022.137377
Acute Toxicity and Transgenerational Effects of Perfluorobutane Sulfonate on Caenorhabditis elegans	Chowdhury MI, Sana T, Panneerselvan L, Dharmarajan R, Megharaj M.	Environmental toxicology and chemistry	10.1002/etc.5055
Acute Toxicity of Eight Aqueous Film-Forming Foams to 14 Aquatic Species	Jones DK, Quinlin KA, Wigren MA, Choi YJ, Sepúlveda MS, Lee LS, Haskins DL, Lotufo GR, Kennedy A, May L, Harmon A, Biber T, Melby N, Chanov MK, Hudson ML, Key PB, Chung KW, Moore DW, Suski JG, Wirth EF, Hoverman JT.	Environmental science & technology	10.1021/acs.est.1c03776
Adaptation of selected models for describing competitive per- and polyfluoroalkyl substances breakthrough curves in groundwater treated by granular activated carbon	Croll HC, Chow S, Ojeda N, Schwab K, Prasse C, Capelle R, Klamerus J, Oppenheimer J, Jacangelo JG.	Journal of hazardous materials	10.1016/j.jhazmat.2022.128804
Addressing Urgent Questions for PFAS in the 21st Century	Ng C, Cousins IT, DeWitt JC, Glüge J, Goldenman G, Herzke D, Lohmann R, Miller M, Patton S, Scheringer M, Trier X, Wang Z.	Environmental science & technology	10.1021/acs.est.1c03386
Adipogenic Activity of Oligomeric Hexafluoropropylene Oxide (Perfluorooctanoic Acid Alternative) through Peroxisome Proliferator-Activated Receptor γ Pathway	Li CH, Ren XM, Guo LH.	Environmental science & technology	10.1021/acs.est.8b06978
Adipogenic and endocrine disrupting mixture effects of organic and inorganic pollutant mixtures	Bérubé R, LeFauve MK, Heldman S, Chiang YT, Birbeck J, Westrick J, Hoffman K, Kassotis CD.	The Science of the total environment	10.1016/j.scitotenv.2023.162587
Adsorption behavior of long-chain perfluoroalkyl substances on hydrophobic surface: A combined molecular characterization and simulation study	Mohona TM, Ye Z, Dai N, Nalam PC.	Water research	10.1016/j.watres.2023.120074
Adsorption of PFAAs in the Vadose Zone and Implications for Long-Term Groundwater Contamination	Gnesda WR, Draxler EF, Tinjum J, Zahasky C.	Environmental science & technology	10.1021/acs.est.2c03962
Adult female rats perinatally exposed to perfluorohexane sulfonate (PFHxS) and a mixture of endocrine disruptors display increased body/fat weights without a transcriptional footprint in fat cells	Ramskov Tetzlaff CN, Ramhøj L, Lardenois A, Axelstad M, Evrard B, Chalmel F, Taxvig C, Svingen T.	Toxicology letters	10.1016/j.toxlet.2020.12.018
Advancing per- and polyfluoroalkyl substances (PFAS) research: an overview of ATSDR and NCEH activities and recommendations	Rogers RD, Reh CM, Breysse P.	Journal of exposure science & environmental epidemiology	10.1038/s41370-021-00316-6
Advancing PFAS Sorbent Design: Mechanisms, Challenges, and Perspectives	He Y, Cheng X, Gunjal SJ, Zhang C.	ACS materials Au	10.1021/acsmaterialsau.3c00066
Adverse birth outcomes related to concentrations of per- and polyfluoroalkyl substances (PFAS) in maternal blood collected from pregnant women in 1960-1966	Zheng T, Kelsey K, Zhu C, Pennell KD, Yao Q, Manz KE, Zheng YF, Braun JM, Liu Y, Papandonatos G, Liu Q, Shi K, Brochman S, Buka SL.	Environmental research	10.1016/j.envres.2023.117010
Adverse effects of gestational exposure to hexafluoropropylene oxide trimer acid (HFPO-TA) homologs on maternal, fetal, and placental health in mice	Zhu B, Sheng N, Dai J.	The Science of the total environment	10.1016/j.scitotenv.2023.169151
Adverse Effects of Perfluorooctane Sulfonate on the Liver and Relevant Mechanisms	Wang P, Liu D, Yan S, Cui J, Liang Y, Ren S.	Toxics	10.3390/toxics10050265
Adverse Impact of Environmental Chemicals on Developmental Origins of Kidney Disease and Hypertension	Hsu CN, Tain YL.	Frontiers in endocrinology	10.3389/fendo.2021.745716
Adverse impacts of environmentally relevant PFOS alternatives on mice pancreatic tissues	Zhao L, Teng M, Shi D, Sun J, Li Y, Zhang Z, Zhu W, Wu F.	The Science of the total environment	10.1016/j.scitotenv.2023.168649
Adverse Maternal, Fetal, and Postnatal Effects of Hexafluoropropylene Oxide Dimer Acid (GenX) from Oral Gestational Exposure in Sprague-Dawley Rats	Conley JM, Lambright CS, Evans N, Strynar MJ, McCord J, McIntyre BS, Travlos GS, Cardon MC, Medlock-Kakaley E, Hartig PC, Wilson VS, Gray LE Jr.	Environmental health perspectives	10.1289/EHP4372
Adverse PFAS effects on mouse oocyte in vitro maturation are associated with carbon-chain length and inclusion of a sulfonate group	Feng J, Soto-Moreno EJ, Prakash A, Balboula AZ, Qiao H.	Cell proliferation	10.1111/cpr.13353
Age at menarche and chemical exposure: per- and polyfluoroalkyl substances (PFAS), dichloro-diphenyl-trichloroethane (DDT), dichloro-diphenyl-dichloroethylene (DDE), and polychlorinated biphenyls (PCBs)	Schell LM, West CN.	Annals of human biology	10.1080/03014460.2023.2221039
Agonistic and potentiating effects of perfluoroalkyl substances (PFAS) on the Atlantic cod (Gadus morhua) peroxisome proliferator-activated receptors (Ppars)	Søderstrøm S, Lille-Langøy R, Yadetie F, Rauch M, Milinski A, Dejaegere A, Stote RH, Goksøyr A, Karlsen OA.	Environment international	10.1016/j.envint.2022.107203
Air-water interfacial adsorption of C4-C10 perfluorocarboxylic acids during transport in unsaturated porous media	Lyu Y, Wang B, Du X, Guo B, Brusseau ML.	The Science of the total environment	10.1016/j.scitotenv.2022.154905
Air-water interfacial areas relevant for transport of per and poly-fluoroalkyl substances	Brusseau ML, Guo B.	Water research	10.1016/j.watres.2021.117785
Aldosterone Biosynthesis Is Potently Stimulated by Perfluoroalkyl Acids: A Link between Common Environmental Pollutants and Arterial Hypertension	Caroccia B, Seccia TM, Pallafacchina G, Piazza M, Caputo I, Zamberlan S, Rizzuto R, Rossi GP.	International journal of molecular sciences	10.3390/ijms24119376
Alteration of hepato-lipidomic homeostasis in A/J mice fed an environmentally relevant PFAS mixture	Khan EA, Grønnestad R, Krøkje Å, Bartosov Z, Johanson SM, Müller MHB, Arukwe A.	Environment international	10.1016/j.envint.2023.107838
Altered expression and activity of phase I and II biotransformation enzymes in human liver cells by perfluorooctanoate (PFOA) and perfluorooctane sulfonate (PFOS)	Franco ME, Sutherland GE, Fernandez-Luna MT, Lavado R.	Toxicology	10.1016/j.tox.2019.152339
Altered Transcriptome Response in PBMCs of Czech Adults Linked to Multiple PFAS Exposure: B Cell Development as a Target of PFAS Immunotoxicity	Rudzanová B, Thon V, Vespalcová H, Martyniuk CJ, Piler P, Zvonař M, Klánová J, Bláha L, Adamovsky O.	Environmental science & technology	10.1021/acs.est.3c05109
Alternatives of perfluoroalkyl acids and hepatitis B virus surface antibody in adults: Isomers of C8 Health Project in China	Zeng XW, Li QQ, Chu C, Ye WL, Yu S, Ma H, Zeng XY, Zhou Y, Yu HY, Hu LW, Yang BY, Dong GH.	Environmental pollution (Barking, Essex : 1987)	10.1016/j.envpol.2019.113857
American oysters as bioindicators of emerging organic contaminants in Florida, United States	Lemos L, Gantiva L, Kaylor C, Sanchez A, Quinete N.	The Science of the total environment	10.1016/j.scitotenv.2022.155316
An (Eco)Toxicity Life Cycle Impact Assessment Framework for Per- And Polyfluoroalkyl Substances	Holmquist H, Fantke P, Cousins IT, Owsianiak M, Liagkouridis I, Peters GM.	Environmental science & technology	10.1021/acs.est.9b07774
An acute exposure to perfluorooctanoic acid causes non-reversible plasma membrane injury in HeLa cells	Peropadre A, Hazen MJ, Pérez Martín JM, Fernández Freire P.	Environmental pollution (Barking, Essex : 1987)	10.1016/j.envpol.2020.114008
An assessment of serum-dependent impacts on intracellular accumulation and genomic response of per- and polyfluoroalkyl substances in a placental trophoblast model	Bangma J, Szilagyi J, Blake BE, Plazas C, Kepper S, Fenton SE, C Fry R.	Environmental toxicology	10.1002/tox.23004
An Environmentally Relevant Mixture of Perfluorooctanesulfonic Acid and Perfluorohexanesulfonic Acid Does Not Conform to Additivity in Northern Leopard Frogs Exposed Through Metamorphosis	Hoskins TD, Allmon EB, Flynn RW, Lee LS, Choi Y, Hoverman JT, Sepúlveda MS.	Environmental toxicology and chemistry	10.1002/etc.5486
An exposure to endocrine active persistent pollutants and endometriosis - a review of current epidemiological studies	Szczęsna D, Wieczorek K, Jurewicz J.	Environmental science and pollution research international	10.1007/s11356-022-24785-w
An integrated approach for chemical water quality assessment of an urban river stretch through Effect-Based Methods and emerging pollutants analysis with a focus on genotoxicity	Carere M, Antoccia A, Buschini A, Frenzilli G, Marcon F, Andreoli C, Gorbi G, Suppa A, Montalbano S, Prota V, De Battistis F, Guidi P, Bernardeschi M, Palumbo M, Scarcelli V, Colasanti M, D'Ezio V, Persichini T, Scalici M, Sgura A, Spani F, Udroiu I, Valenzuela M, Lacchetti I, di Domenico K, Cristiano W, Marra V, Ingelido AM, Iacovella N, De Felip E, Massei R, Mancini L.	Journal of environmental management	10.1016/j.jenvman.2021.113549
An integrated assessment of ecological and human health risks of per- and polyfluoroalkyl substances through toxicity prediction approaches	Hamid N, Junaid M, Manzoor R, Sultan M, Chuan OM, Wang J.	The Science of the total environment	10.1016/j.scitotenv.2023.167213
An 'Omics Approach to Unraveling the Paradoxical Effect of Diet on Perfluorooctanesulfonic Acid (PFOS) and Perfluorononanoic Acid (PFNA)-Induced Hepatic Steatosis	Pfohl M, Marques E, Auclair A, Barlock B, Jamwal R, Goedken M, Akhlaghi F, Slitt AL.	Toxicological sciences : an official journal of the Society of Toxicology	10.1093/toxsci/kfaa172
An unexpected synergistic toxicity caused by competitive bioconcentration of perfluoroalkyl acid mixtures to Daphnia magna: Further promoted by elevated temperature	Zhang Q, Zhang Y, Hu D, Wen W, Xia X.	Environmental pollution (Barking, Essex : 1987)	10.1016/j.envpol.2022.120336
Analysis and distribution of per- and polyfluoroalkyl substances in decidua and villi placenta explants	Pascali JP, Piva E, Bonasoni MP, Migliavacca C, Seidenari A, Fais P.	Environmental research	10.1016/j.envres.2023.115955
Analysis of per- and polyfluoroalkyl substances in Houston Ship Channel and Galveston Bay following a large-scale industrial fire using ion-mobility-spectrometry-mass spectrometry	Valdiviezo A, Aly NA, Luo YS, Cordova A, Casillas G, Foster M, Baker ES, Rusyn I.	Journal of environmental sciences (China)	10.1016/j.jes.2021.08.004
Analytical approaches for screening of per- and poly fluoroalkyl substances in food items: A review of recent advances and improvements	Ogunbiyi OD, Ajiboye TO, Omotola EO, Oladoye PO, Olanrewaju CA, Quinete N.	Environmental pollution (Barking, Essex : 1987)	10.1016/j.envpol.2023.121705
Analytical method interferences for perfluoropentanoic acid (PFPeA) and perfluorobutanoic acid (PFBA) in biological and environmental samples	Bangma J, McCord J, Giffard N, Buckman K, Petali J, Chen C, Amparo D, Turpin B, Morrison G, Strynar M.	Chemosphere	10.1016/j.chemosphere.2022.137722
Anion exchange resin removal of per- and polyfluoroalkyl substances (PFAS) from impacted water: A critical review	Boyer TH, Fang Y, Ellis A, Dietz R, Choi YJ, Schaefer CE, Higgins CP, Strathmann TJ.	Water research	10.1016/j.watres.2021.117244
Antibiotic induced restructuring of the gut microbiota does not affect oral uptake and accumulation of perfluorooctane sulfonic acid (PFOS) in rats	Lykkebo CA, Mortensen MS, Davidsen N, Bahl MI, Ramhøj L, Granby K, Svingen T, Licht TR.	Environmental pollution (Barking, Essex : 1987)	10.1016/j.envpol.2023.122179
Antioxidant defence system is responsible for the toxicological interactions of mixtures: A case study on PFOS and PFOA in Daphnia magna	Yang HB, Zhao YZ, Tang Y, Gong HQ, Guo F, Sun WH, Liu SS, Tan H, Chen F.	The Science of the total environment	10.1016/j.scitotenv.2019.02.418
Antioxidant defense system responses, lysosomal membrane stability and DNA damage in earthworms (Eisenia fetida) exposed to perfluorooctanoic acid: an integrated biomarker approach to evaluating toxicity	Wang Z, Li C, Shao Y, Xue W, Wang N, Xu X, Zhang Z.	RSC advances	10.1039/d1ra04097a
Application of a Framework for Grouping and Mixtures Toxicity Assessment of PFAS: A Closer Examination of Dose-Additivity Approaches	Goodrum PE, Anderson JK, Luz AL, Ansell GK.	Toxicological sciences : an official journal of the Society of Toxicology	10.1093/toxsci/kfaa123
Application of photocatalytic ozonation with a WO(3)/TiO(2) catalyst for PFAS removal under UVA/visible light	Lashuk B, Pineda M, AbuBakr S, Boffito D, Yargeau V.	The Science of the total environment	10.1016/j.scitotenv.2022.157006
Application of quantitative transcriptomics in evaluating the ex vivo effects of per- and polyfluoroalkyl substances on Atlantic cod (Gadus morhua) ovarian physiology	Khan EA, Zhang X, Hanna EM, Yadetie F, Jonassen I, Goksøyr A, Arukwe A.	The Science of the total environment	10.1016/j.scitotenv.2020.142904
Application of surfactant modified montmorillonite with different conformation for photo-treatment of perfluorooctanoic acid by hydrated electrons	Chen Z, Tian H, Li H, Li J, Hong R, Sheng F, Wang C, Gu C.	Chemosphere	10.1016/j.chemosphere.2019.07.032
Application of two statistical approaches (Bayesian Kernel Machine Regression and Principal Component Regression) to assess breast cancer risk in association to exposure to mixtures of brominated flame retardants and per- and polyfluorinated alkylated substances in the E3N cohort	Frenoy P, Perduca V, Cano-Sancho G, Antignac JP, Severi G, Mancini FR.	Environmental health : a global access science source	10.1186/s12940-022-00840-4
Aquatic toxicity evaluations of PFOS and PFOA for five standard marine endpoints	Hayman NT, Rosen G, Colvin MA, Conder J, Arblaster JA.	Chemosphere	10.1016/j.chemosphere.2021.129699
Aquatic Vegetation, an Understudied Depot for PFAS	Griffin EK, Hall LM, Brown MA, Taylor-Manges A, Green T, Suchanec K, Furman BT, Congdon VM, Wilson SS, Osborne TZ, Martin S, Schultz EA, Holden MM, Lukacsa DT, Greenberg JA, Deliz Quiñones KY, Lin EZ, Camacho C, Bowden JA.	Journal of the American Society for Mass Spectrometry	10.1021/jasms.3c00018
Aqueous film forming foam and associated perfluoroalkyl substances inhibit methane production and Co-contaminant degradation in an anaerobic microbial community	Fitzgerald NJM, Temme HR, Simcik MF, Novak PJ.	Environmental science. Processes & impacts	10.1039/c9em00241c
Are Fluoropolymers Really of Low Concern for Human and Environmental Health and Separate from Other PFAS?	Lohmann R, Cousins IT, DeWitt JC, Glüge J, Goldenman G, Herzke D, Lindstrom AB, Miller MF, Ng CA, Patton S, Scheringer M, Trier X, Wang Z.	Environmental science & technology	10.1021/acs.est.0c03244
Are perfluoroalkyl substances in water and fish from drinking water source the major pathways towards human health risk?	Meng J, Liu S, Zhou Y, Wang T.	Ecotoxicology and environmental safety	10.1016/j.ecoenv.2019.06.010
Are PFBS, PFHxS, and 6:2FTSA more friendly to the soil environment compared to PFOS? A new insight based on ecotoxicity study in soil invertebrates (Eisenia fetida)	Li D, Zhang J, Liu X, Wang X, Li B, Du Z, Juhasz A, Wang J, Wang J, Zhu L.	The Science of the total environment	10.1016/j.scitotenv.2023.166689
Are resource recovery insects safe for feed and food? A screening approach for bioaccumulative trace organic contaminants	Li W, Bischel HN.	The Science of the total environment	10.1016/j.scitotenv.2022.155850
Argumentation Analysis of Risk Assessments: The Case of Perfluorooctanoic Acid	Jongeneel WP, van Klaveren H, Bogers RP, Dévilee J, Rijs KR, Piersma A, Vermeire T, Lebret E.	Risk analysis : an official publication of the Society for Risk Analysis	10.1111/risa.13793
Assembly and Curation of Lists of Per- and Polyfluoroalkyl Substances (PFAS) to Support Environmental Science Research	Williams AJ, Gaines LGT, Grulke CM, Lowe CN, Sinclair GFB, Samano V, Thillainadarajah I, Meyer B, Patlewicz G, Richard AM.	Frontiers in environmental science	10.3389/fenvs.2022.850019
Assessing construction and demolition wood-derived biochar for in-situ per- and polyfluoroalkyl substance (PFAS) removal from landfill leachate	Cerlanek A, Liu Y, Robey N, Timshina AS, Bowden JA, Townsend TG.	Waste management (New York, N.Y.)	10.1016/j.wasman.2023.12.017
Assessing explicit models of per- and polyfluoroalkyl substances adsorption on anion exchange resins by rapid small-scale column tests	Wang Y, Warner M, Li K, Hawkins GL, Huang Q.	Chemosphere	10.1016/j.chemosphere.2022.134547
Assessing exposures to per- and polyfluoroalkyl substances in two populations of Great Lakes Basin fish consumers in Western New York State	Liu M, Nordstrom M, Forand S, Lewis-Michl E, Wattigney WA, Kannan K, Wang W, Irvin-Barnwell E, Hwang SA.	International journal of hygiene and environmental health	10.1016/j.ijheh.2021.113902
Assessing Human Health Risks from Per- and Polyfluoroalkyl Substance (PFAS)-Impacted Vegetable Consumption: A Tiered Modeling Approach	Brown JB, Conder JM, Arblaster JA, Higgins CP.	Environmental science & technology	10.1021/acs.est.0c03411
Assessing Potential Perfluoroalkyl Substances Trophic Transfer to Crickets (Acheta domesticus)	McDermett K, Anderson T, Jackson WA, Guelfo J.	Environmental toxicology and chemistry	10.1002/etc.5478
Assessing the Ecological Risks of Per- and Polyfluoroalkyl Substances: Current State-of-the Science and a Proposed Path Forward	Ankley GT, Cureton P, Hoke RA, Houde M, Kumar A, Kurias J, Lanno R, McCarthy C, Newsted J, Salice CJ, Sample BE, Sepúlveda MS, Steevens J, Valsecchi S.	Environmental toxicology and chemistry	10.1002/etc.4869
Assessing the hepatotoxicity of PFOA, PFOS, and 6:2 Cl-PFESA in black-spotted frogs (Rana nigromaculata) and elucidating potential association with gut microbiota	Lin H, Wu H, Liu F, Yang H, Shen L, Chen J, Zhang X, Zhong Y, Zhang H, Liu Z.	Environmental pollution (Barking, Essex : 1987)	10.1016/j.envpol.2022.120029
Assessing the human health risks of per- and polyfluoroalkyl substances: A need for greater focus on their interactions as mixtures	Ojo AF, Peng C, Ng JC.	Journal of hazardous materials	10.1016/j.jhazmat.2020.124863
Assessing the human health risks of perfluorooctane sulfonate by in vivo and in vitro studies	Zeng Z, Song B, Xiao R, Zeng G, Gong J, Chen M, Xu P, Zhang P, Shen M, Yi H.	Environment international	10.1016/j.envint.2019.03.002
Assessing the persistence, mobility and toxicity of emerging organic contaminants in Croatian karst springs used for drinking water supply	Selak A, Reberski JL, Klobučar G.	The Science of the total environment	10.1016/j.scitotenv.2023.166240
Assessing the trophic ecology and migration on the exposure of cape petrels and Wilson's storm petrels from Antarctica to perfluoroalkylated substances, trace and major elements	Padilha JAG, Santos S, Willems T, Souza-Kasprzyk J, Leite A, Cunha LST, Costa ES, Pessôa AR, Eens M, E P, Torres JPM, Das K, Lepoint G, Dorneles PR, Bervoets L, Groffen T.	Environmental research	10.1016/j.envres.2023.117827
Assessment of 18 endocrine disrupting chemicals in tap water samples from Klang Valley, Malaysia	Haron DEM, Yoneda M, Hod R, Ramli MR, Aziz MY.	Environmental science and pollution research international	10.1007/s11356-023-30022-9
Assessment of endocrine disruptor impacts on lipid metabolism in a fatty acid-supplemented HepaRG human hepatic cell line	Bernal K, Touma C, Le-Grand B, Rose S, Degerli S, Genêt V, Lagadic-Gossmann D, Coumoul X, Martin-Chouly C, Langouët S, Blanc EB.	Chemosphere	10.1016/j.chemosphere.2023.140883
Assessment of exposure to perfluoroalkyl substances (PFASs) in dogs by fur analysis	Makowska K, Martín J, Rychlik A, Aparicio I, Santos JL, Alonso E, Gonkowski S.	Environmental pollution (Barking, Essex : 1987)	10.1016/j.envpol.2021.117435
Assessment of Mouse Liver Histopathology Following Exposure to HFPO-DA With Emphasis on Understanding Mechanisms of Hepatocellular Death	Thompson CM, Heintz MM, Wolf JC, Cheru R, Haws LC, Cullen JM.	Toxicologic pathology	10.1177/01926233231159078
Assessment of organohalogenated pollutants in breast milk from the Czech Republic	Parizek O, Gramblicka T, Parizkova D, Polachova A, Bechynska K, Dvorakova D, Stupak M, Dusek J, Pavlikova J, Topinka J, Sram RJ, Pulkrabova J.	The Science of the total environment	10.1016/j.scitotenv.2023.161938
Assessment of per- and polyfluoroalkyl substances (PFAS) in the Indian River Lagoon and Atlantic coast of Brevard County, FL, reveals distinct spatial clusters	Griffin EK, Aristizabal-Henao J, Timshina A, Ditz HL, Camacho CG, da Silva BF, Coker ES, Deliz Quiñones KY, Aufmuth J, Bowden JA.	Chemosphere	10.1016/j.chemosphere.2022.134478
Assessment of perfluoroalkyl substances levels in tap and bottled water samples from Turkey	Ünlü Endirlik B, Bakır E, Boşgelmez İİ, Eken A, Narin İ, Gürbay A.	Chemosphere	10.1016/j.chemosphere.2019.06.228
Assessment of perfluorooctanoic acid toxicity in pancreatic cells	Abudayyak M, Öztaş E, Özhan G.	Toxicology in vitro : an international journal published in association with BIBRA	10.1016/j.tiv.2021.105077
Assessment of the applicability of the threshold of toxicological concern for per- and polyfluoroalkyl substances	Lea IA, Pham LL, Antonijevic T, Thompson C, Borghoff SJ.	Regulatory toxicology and pharmacology : RTP	10.1016/j.yrtph.2022.105190
Assessment of the Emerging Threat Posed by Perfluoroalkyl and Polyfluoroalkyl Substances to Male Reproduction in Humans	Calvert L, Green MP, De Iuliis GN, Dun MD, Turner BD, Clarke BO, Eamens AL, Roman SD, Nixon B.	Frontiers in endocrinology	10.3389/fendo.2021.799043
Assessment of the mode of action underlying development of liver lesions in mice following oral exposure to HFPO-DA and relevance to humans	Heintz MM, Haws LC, Klaunig JE, Cullen JM, Thompson CM.	Toxicological sciences : an official journal of the Society of Toxicology	10.1093/toxsci/kfad004
Assessment of the Mode of Action Underlying the Effects of GenX in Mouse Liver and Implications for Assessing Human Health Risks	Chappell GA, Thompson CM, Wolf JC, Cullen JM, Klaunig JE, Haws LC.	Toxicologic pathology	10.1177/0192623320905803
Assessment of unique behavioral, morphological, and molecular alterations in the comparative developmental toxicity profiles of PFOA, PFHxA, and PFBA using the zebrafish model system	Wasel O, Thompson KM, Freeman JL.	Environment international	10.1016/j.envint.2022.107642
Association between early-childhood exposure to perfluoroalkyl substances and ADHD symptoms: A prospective cohort study	Kim JI, Kim BN, Lee YA, Shin CH, Hong YC, Døssing LD, Hildebrandt G, Lim YH.	The Science of the total environment	10.1016/j.scitotenv.2023.163081
Association between exposure to per- and perfluoroalkyl substances (PFAS) and reproductive hormones in human: A systematic review and meta-analysis	Li L, Guo Y, Ma S, Wen H, Li Y, Qiao J.	Environmental research	10.1016/j.envres.2023.117553
Association between exposure to perfluoroalkyl substances and uric acid in Chinese adults	Yang Z, Men K, Guo J, Liu R, Liu H, Wei J, Zhang J, Liu L, Lin X, Zhang M, Liu Y, Chen Y, Tang NJ.	Chemosphere	10.1016/j.chemosphere.2022.137164
Association between exposure to polyfluoroalkyl chemicals and increased fractional exhaled nitric oxide in adults	Xu H, Mao Y, Hu Y, Xu B.	Environmental research	10.1016/j.envres.2020.110450
Association between gestational PFAS exposure and Children's adiposity in a diverse population	Bloom MS, Commodore S, Ferguson PL, Neelon B, Pearce JL, Baumer A, Newman RB, Grobman W, Tita A, Roberts J, Skupski D, Palomares K, Nageotte M, Kannan K, Zhang C, Wapner R, Vena JE, Hunt KJ.	Environmental research	10.1016/j.envres.2021.111820
Association between maternal exposure to per- and polyfluoroalkyl substances and serum markers of liver function during pregnancy in China: A mixture-based approach	Liao Q, Tang P, Fan H, Song Y, Liang J, Huang H, Pan D, Mo M, LeiLei, Lin M, Chen J, Wei H, Long J, Shao Y, Zeng X, Liu S, Huang D, Qiu X.	Environmental pollution (Barking, Essex : 1987)	10.1016/j.envpol.2023.121348
Association between maternal exposure to perfluoroalkyl and polyfluoroalkyl substances and risks of adverse pregnancy outcomes: A systematic review and meta-analysis	Deji Z, Liu P, Wang X, Zhang X, Luo Y, Huang Z.	The Science of the total environment	10.1016/j.scitotenv.2021.146984
Association between maternal per- and polyfluoroalkyl substance exposure and newborn telomere length: Effect modification by birth seasons	Pan D, Shao Y, Song Y, Huang D, Liu S, Zeng X, Liang J, Juan Jennifer Tan H, Qiu X.	Environment international	10.1016/j.envint.2022.107125
Association between per and polyfluoroalkyl substances and markers of inflammation and oxidative stress	Omoike OE, Pack RP, Mamudu HM, Liu Y, Strasser S, Zheng S, Okoro J, Wang L.	Environmental research	10.1016/j.envres.2020.110361
Association between per- and polyfluoroalkyl substances and risk of gestational diabetes mellitus	Wang J, Zhang J, Fan Y, Li Z, Tao C, Yan W, Niu R, Huang Y, Xu Q, Wang X, Xu Q, Han L, Lu C.	International journal of hygiene and environmental health	10.1016/j.ijheh.2021.113904
Association between per- and polyfluoroalkyl substances and risk of hypertension: a systematic review and meta-analysis	Xiao F, An Z, Lv J, Sun X, Sun H, Liu Y, Liu X, Guo H.	Frontiers in public health	10.3389/fpubh.2023.1173101
Association between perfluoroalkyl acids and the prevalence of hypertension among US adults	Liao S, Yao W, Cheang I, Tang X, Yin T, Lu X, Zhou Y, Zhang H, Li X.	Ecotoxicology and environmental safety	10.1016/j.ecoenv.2020.110589
Association between perfluoroalkyl and polyfluoroalkyl substances exposure and fetal overgrowth: A prospective birth cohort study conducted in China	Pan D, Song Y, Liu S, Zeng X, Pang Q, Zhang Y, Wu H, Tan HJJ, Liao Q, Liang J, Huang D, Qiu X.	Environmental research	10.1016/j.envres.2023.116175
Association between perfluoroalkyl substance exposure and thyroid hormone/thyroid antibody levels in maternal and cord blood: The Hokkaido Study	Itoh S, Araki A, Miyashita C, Yamazaki K, Goudarzi H, Minatoya M, Ait Bamai Y, Kobayashi S, Okada E, Kashino I, Yuasa M, Baba T, Kishi R.	Environment international	10.1016/j.envint.2019.105139
Association between perfluoroalkyl substances exposure and the prevalence of nonalcoholic fatty liver disease in the different sexes: a study from the National Health and Nutrition Examination Survey 2005-2018	E L, Zhang S, Jiang X.	Environmental science and pollution research international	10.1007/s11356-023-25258-4
Association between PFAS congeners exposure and asthma among US children in a nationally representative sample	Wang YF, Xie B, Zou YX.	Environmental geochemistry and health	10.1007/s10653-023-01614-8
Association between polyfluoroalkyl substances exposure and sex steroids in adolescents: The mediating role of serum albumin	Guo J, Huang S, Yang L, Zhou J, Xu X, Lin S, Li H, Xie X, Wu S.	Ecotoxicology and environmental safety	10.1016/j.ecoenv.2023.114687
Association Between Prenatal and Early Postnatal Exposure to Perfluoroalkyl Substances and IQ Score in 7-Year-Old Children From the Odense Child Cohort	Beck IH, Bilenberg N, Möller S, Nielsen F, Grandjean P, Højsager FD, Halldorsson TI, Nielsen C, Jensen TK.	American journal of epidemiology	10.1093/aje/kwad110
Association between prenatal exposure to perfluoroalkyl substances and anogenital distance in female neonates	Li J, Yang L, He G, Wang B, Miao M, Ji H, Wen S, Cao W, Yuan W, Liang H.	Ecotoxicology and environmental safety	10.1016/j.ecoenv.2022.114130
Association between prenatal exposure to perfluoroalkyl substances and respiratory tract infections in preschool children	Huang H, Yu K, Zeng X, Chen Q, Liu Q, Zhao Y, Zhang J, Zhang X, Huang L.	Environmental research	10.1016/j.envres.2020.110156
Association between Prenatal Exposure to PFAS and Fetal Sex Hormones: Are the Short-Chain PFAS Safer?	Nian M, Luo K, Luo F, Aimuzi R, Huo X, Chen Q, Tian Y, Zhang J.	Environmental science & technology	10.1021/acs.est.0c02444
Association between serum concentrations of perfluoroalkyl substances (PFAS) and expression of serum microRNAs in a cohort highly exposed to PFAS from drinking water	Xu Y, Jurkovic-Mlakar S, Li Y, Wahlberg K, Scott K, Pineda D, Lindh CH, Jakobsson K, Engström K.	Environment international	10.1016/j.envint.2019.105446
Association between serum per- and polyfluoroalkyl substances and thrombograms in young and middle-aged Taiwanese populations	Lin CY, Wang C, Sung FC, Su TC.	Ecotoxicology and environmental safety	10.1016/j.ecoenv.2022.113457
Association between serum per- and polyfluoroalkyl substances concentrations and common cold among children and adolescents in the United States	Zhang Y, Mustieles V, Sun Y, Oulhote Y, Wang YX, Messerlian C.	Environment international	10.1016/j.envint.2022.107239
Association between the total plasma isomers of per- and polyfluoroalkyl substances and erythrograms in young and middle-aged Taiwanese populations	Lin CY, Lee HL, Wang C, Sung FC, Su TC.	Ecotoxicology and environmental safety	10.1016/j.ecoenv.2021.112902
Association between urinary per- and poly-fluoroalkyl substances and COVID-19 susceptibility	Ji J, Song L, Wang J, Yang Z, Yan H, Li T, Yu L, Jian L, Jiang F, Li J, Zheng J, Li K.	Environment international	10.1016/j.envint.2021.106524
Association of adverse fetal outcomes with placental inflammation after oral gestational exposure to hexafluoropropylene oxide dimer acid (GenX) in Sprague-Dawley rats	Lv D, Liu H, An Q, Lei C, Wang Y, Sun J, Li C, Lin Y, Dong Q, Yang Z, Che K, Liu W, Han W.	Journal of hazardous materials	10.1016/j.jhazmat.2023.132536
Association of emerging and legacy per- and polyfluoroalkyl substances with unexplained recurrent spontaneous abortion	Nian M, Huo X, Zhang J, Mao Y, Jin F, Shi Y, Zhang J.	Ecotoxicology and environmental safety	10.1016/j.ecoenv.2022.113691
Association of exposure to perfluoroalkyl substances (PFAS) and phthalates with thyroid hormones in adolescents from HBM4EU aligned studies	Rodríguez-Carrillo A, Salamanca-Fernández E, den Hond E, Verheyen VJ, Fábelová L, Murinova LP, Pedraza-Díaz S, Castaño A, García-Lario JV, Remy S, Govarts E, Schoeters G, Olea N, Freire C, Fernández MF.	Environmental research	10.1016/j.envres.2023.116897
Association of exposure to perfluoroalkyl substances and risk of the acute coronary syndrome: A case-control study in Shijiazhuang Hebei Province	Li H, Chen J, Jingchao Lu, Yang J, Tan Z, Li L, Xiao F, An Z, Ma C, Liu Y, Wang L, Zhang X, Guo H.	Chemosphere	10.1016/j.chemosphere.2022.137464
Association of exposure to prenatal perﬂuoroalkyl substances and estrogen receptor 1 polymorphisms with the second to fourth digit ratio in school-aged children: The Hokkaido study	Nishimura Y, Moriya K, Kobayashi S, Ikeda-Araki A, Sata F, Mitsui T, Itoh S, Miyashita C, Cho K, Kon M, Nakamura M, Kitta T, Murai S, Kishi R, Shinohara N.	Reproductive toxicology (Elmsford, N.Y.)	10.1016/j.reprotox.2022.02.002
Association of maternal perfluoroalkyl substance exposure with postpartum haemorrhage in Guangxi, China	Lin M, Liao Q, Tang P, Song Y, Liang J, Li J, Mu C, Liu S, Qiu X, Yi R, Pang Q, Pan D, Zeng X, Huang D.	Ecotoxicology and environmental safety	10.1016/j.ecoenv.2022.114078
Association of Per- and Polyfluoroalkyl Substances with Allostatic Load Stratified by Herpes Simplex Virus 1 and 2 Exposure	Boafo YS, Mostafa S, Obeng-Gyasi E.	Toxics	10.3390/toxics11090745
Association of per- and polyfluoroalkyl substances with hepatic steatosis and metabolic dysfunction-associated fatty liver disease among patients with acute coronary syndrome	Yang M, Su W, Li H, Li L, An Z, Xiao F, Liu Y, Zhang X, Liu X, Guo H, Li A.	Ecotoxicology and environmental safety	10.1016/j.ecoenv.2023.115473
Association of perfluoroalkyl substances with gestational hypertension and preeclampsia in the MIREC study	Borghese MM, Walker M, Helewa ME, Fraser WD, Arbuckle TE.	Environment international	10.1016/j.envint.2020.105789
Association of perfluoroalkyl substances with pulmonary function in adolescents (NHANES 2007-2012)	Shi S, Ding Y, Wu B, Hu P, Chen M, Dong N, Vinturache A, Gu H, Dong X, Ding G.	Environmental science and pollution research international	10.1007/s11356-023-26119-w
Association of serum per- and polyfluoroalkyl substances and gestational anemia during different trimesters in Zhuang ethnic pregnancy women of Guangxi, China	Liao Q, Tang P, Pan D, Song Y, Lei L, Liang J, Liu B, Lin M, Huang H, Mo M, Huang C, Wei M, Liu S, Huang D, Qiu X.	Chemosphere	10.1016/j.chemosphere.2022.136798
Association of single and multiple prefluoroalkyl substances exposure with preterm birth: Results from a Chinese birth cohort study	Liao Q, Tang P, Song Y, Liu B, Huang H, Liang J, Lin M, Shao Y, Liu S, Pan D, Huang D, Qiu X.	Chemosphere	10.1016/j.chemosphere.2022.135741
Associations among perfluorooctanesulfonic/perfluorooctanoic acid levels, nuclear receptor gene polymorphisms, and lipid levels in pregnant women in the Hokkaido study	Kobayashi S, Sata F, Goudarzi H, Araki A, Miyashita C, Sasaki S, Okada E, Iwasaki Y, Nakajima T, Kishi R.	Scientific reports	10.1038/s41598-021-89285-2
Associations between apolipoprotein B and selected perfluoroalkyl substances among diabetics and nondiabetics	Jain RB, Ducatman A.	Environmental science and pollution research international	10.1007/s11356-020-11593-3
Associations between exposure to perfluoroalkyl substances and birth outcomes: A meta-analysis	Yang Z, Liu HY, Yang QY, Chen X, Li W, Leng J, Tang NJ.	Chemosphere	10.1016/j.chemosphere.2021.132909
Associations between maternal exposure to perfluoroalkylated substances (PFASs) and infant birth weight: a meta-analysis	Lan L, Wei H, Chen D, Pang L, Xu Y, Tang Q, Li J, Xu Q, Li H, Lu C, Wu W.	Environmental science and pollution research international	10.1007/s11356-023-28458-0
Associations between Mixture of Perfluoroalkyl Substances and Lipid Profile in a Highly Exposed Adult Community in the Veneto Region	Batzella E, Zare Jeddi M, Pitter G, Russo F, Fletcher T, Canova C.	International journal of environmental research and public health	10.3390/ijerph191912421
Associations between perfluoroalkyl substances and lipid profile in a highly exposed young adult population in the Veneto Region	Canova C, Barbieri G, Zare Jeddi M, Gion M, Fabricio A, Daprà F, Russo F, Fletcher T, Pitter G.	Environment international	10.1016/j.envint.2020.106117
Associations between persistent organic pollutants and endometriosis: A multiblock approach integrating metabolic and cytokine profiling	Matta K, Lefebvre T, Vigneau E, Cariou V, Marchand P, Guitton Y, Royer AL, Ploteau S, Le Bizec B, Antignac JP, Cano-Sancho G.	Environment international	10.1016/j.envint.2021.106926
Associations between polyfluoroalkyl substance and organophosphate flame retardant exposures and telomere length in a cohort of women firefighters and office workers in San Francisco	Clarity C, Trowbridge J, Gerona R, Ona K, McMaster M, Bessonneau V, Rudel R, Buren H, Morello-Frosch R.	Environmental health : a global access science source	10.1186/s12940-021-00778-z
Associations between polyfluoroalkyl substance and organophosphate flame retardant exposures and telomere length in a cohort of women firefighters and office workers in San Francisco	Clarity C, Trowbridge J, Gerona R, Ona K, McMaster M, Bessonneau V, Rudel R, Buren H, Morello-Frosch R.		10.1101/2020.11.05.20226183
Associations between prenatal exposure to per- and polyfluoroalkyl substances and wheezing and asthma symptoms in 4-year-old children: The Japan Environment and Children's Study	Atagi T, Hasegawa K, Motoki N, Inaba Y, Toubou H, Shibazaki T, Nakayama SF, Kamijima M, Tsukahara T, Nomiyama T; Japan Environment and Children's Study (JECS) Group.	Environmental research	10.1016/j.envres.2023.117499
Associations between prenatal exposure to perfluoroalkyl substances and neurobehavioral development in early childhood: A prospective cohort study	Xie Z, Tan J, Fang G, Ji H, Miao M, Tian Y, Hu H, Cao W, Liang H, Yuan W.	Ecotoxicology and environmental safety	10.1016/j.ecoenv.2022.113818
Associations between prenatal exposure to perfluoroalkyl substances, hypomethylation of MEST imprinted gene and birth outcomes	Ku MS, Pan WC, Huang YT, Hsieh WS, Hsu YH, Chen PC, Liu CY.	Environmental pollution (Barking, Essex : 1987)	10.1016/j.envpol.2022.119183
Associations between repeated measure of plasma perfluoroalkyl substances and cardiometabolic risk factors	Donat-Vargas C, Bergdahl IA, Tornevi A, Wennberg M, Sommar J, Koponen J, Kiviranta H, Åkesson A.	Environment international	10.1016/j.envint.2019.01.007
Associations between serum concentrations of perfluoroalkyl substances and DNA methylation in women exposed through drinking water: A pilot study in Ronneby, Sweden	Xu Y, Jurkovic-Mlakar S, Lindh CH, Scott K, Fletcher T, Jakobsson K, Engström K.	Environment international	10.1016/j.envint.2020.106148
Associations between serum perfluoroalkyl acid (PFAA) concentrations and health related biomarkers in firefighters	Nilsson S, Smurthwaite K, Aylward LL, Kay M, Toms LM, King L, Marrington S, Kirk MD, Mueller JF, Bräunig J.	Environmental research	10.1016/j.envres.2022.114370
Associations between six common per- and polyfluoroalkyl substances and estrogens in neonates of China	Liu H, Pan Y, Jin S, Sun X, Jiang Y, Wang Y, Ghassabian A, Li Y, Xia W, Cui Q, Zhang B, Zhou A, Dai J, Xu S.	Journal of hazardous materials	10.1016/j.jhazmat.2020.124378
Associations of exposure to per- and polyfluoroalkyl substances mixture with the numbers of lymph nodes in colorectal cancer patients	Cui J, Shi J, Gao X, He L, Huang H, Zhao G, Wu G, Yu T, An Q, Mai L, Chen G.	Environmental research	10.1016/j.envres.2023.117529
Associations of exposure to perfluoroalkyl substances individually and in mixtures with persistent infections: Recent findings from NHANES 1999-2016	Bulka CM, Avula V, Fry RC.	Environmental pollution (Barking, Essex : 1987)	10.1016/j.envpol.2021.116619
Associations of exposure to perfluoroalkyl substances with serum uric acid change and hyperuricemia among Chinese women: Results from a longitudinal study	Feng Y, Fu M, Guan X, Wang C, Meng H, Zhou Y, He M, Guo H.	Chemosphere	10.1016/j.chemosphere.2022.136438
Associations of Exposure to Perfluoroalkyl Substances With Thyroid Hormone Concentrations and Birth Size	Xiao C, Grandjean P, Valvi D, Nielsen F, Jensen TK, Weihe P, Oulhote Y.	The Journal of clinical endocrinology and metabolism	10.1210/clinem/dgz147
Associations of Maternal Stress, Prenatal Exposure to Per- and Polyfluoroalkyl Substances (PFAS), and Demographic Risk Factors with Birth Outcomes and Offspring Neurodevelopment: An Overview of the ECHO.CA.IL Prospective Birth Cohorts	Eick SM, Enright EA, Geiger SD, Dzwilewski KLC, DeMicco E, Smith S, Park JS, Aguiar A, Woodruff TJ, Morello-Frosch R, Schantz SL.	International journal of environmental research and public health	10.3390/ijerph18020742
Associations of multiple exposures to persistent toxic substances with the risk of hyperuricemia and subclinical uric acid levels in BIOAMBIENT.ES study	Arrebola JP, Ramos JJ, Bartolomé M, Esteban M, Huetos O, Cañas AI, López-Herranz A, Calvo E, Pérez-Gómez B, Castaño A; BIOAMBIENT.ES.	Environment international	10.1016/j.envint.2018.12.030
Associations of paternal and maternal per- and polyfluoroalkyl substances exposure with cord serum reproductive hormones, placental steroidogenic enzyme and birth weight	Yao Q, Gao Y, Zhang Y, Qin K, Liew Z, Tian Y.	Chemosphere	10.1016/j.chemosphere.2021.131521
Associations of per- and polyfluoroalkyl substances (PFAS) and their mixture with oxidative stress biomarkers during pregnancy	Taibl KR, Schantz S, Aung MT, Padula A, Geiger S, Smith S, Park JS, Milne GL, Robinson JF, Woodruff TJ, Morello-Frosch R, Eick SM.	Environment international	10.1016/j.envint.2022.107541
Associations of per- and polyfluoroalkyl substances, polychlorinated biphenyls, organochlorine pesticides, and polybrominated diphenyl ethers with oxidative stress markers: A systematic review and meta-analysis	Chen JC, Baumert BO, Li Y, Li Y, Pan S, Robinson S, Rubbo B, Costello E, He J, Hampson H, Beglarian E, Rock S, Goodrich JA, Eckel SP, Aung MT, McConnell R, Conti DV, Chatzi L.	Environmental research	10.1016/j.envres.2023.117308
Associations of perfluoroalkyl and polyfluoroalkyl substances with gestational hypertension and blood pressure during pregnancy: A cohort study	Yang L, Ji H, Liang H, Yuan W, Song X, Li X, Niu J, Shi H, Wen S, Miao M.	Environmental research	10.1016/j.envres.2022.114284
Associations of prenatal exposure to per- and polyfluoroalkyl substances (PFAS) with measures of cognition in 7.5-month-old infants: An exploratory study	Enright EA, Eick SM, Morello-Frosch R, Aguiar A, Woodbury ML, Sprowles JLN, Geiger SD, Trowbridge J, Andrade A, Smith S, Park JS, DeMicco E, Padula AM, Woodruff TJ, Schantz SL.	Neurotoxicology and teratology	10.1016/j.ntt.2023.107182
Associations of Prenatal Exposure to Per- and Polyfluoroalkyl Substances with the Neonatal Birth Size and Hormones in the Growth Hormone/Insulin-Like Growth Factor Axis	Luo D, Wu W, Pan Y, Du B, Shen M, Zeng L.	Environmental science & technology	10.1021/acs.est.1c02670
Associations of prenatal exposure to perfluoroalkyl substances with preterm birth: A family-based birth cohort study	Yu Y, Qin XD, Bloom MS, Chu C, Dai X, Li QQ, Chen ZX, Kong ML, Xie YQ, Meng WJ, Yang BY, Hu LW, Zeng XW, Zhao XM, Zhou Y, Dong GH.	Environmental research	10.1016/j.envres.2022.113803
Associations of serum PFOA and PFOS levels with incident hypertension risk and change of blood pressure levels	Zhang Z, Wang F, Zhang Y, Yao J, Bi J, He J, Zhang S, Wei Y, Guo H, Zhang X, He M.	Environmental research	10.1016/j.envres.2022.113293
Associations of single and multiple per- and polyfluoroalkyl substance (PFAS) exposure with vitamin D biomarkers in African American women during pregnancy	Chang CJ, Barr DB, Zhang Q, Dunlop AL, Smarr MM, Kannan K, Panuwet P, Tangpricha V, Shi L, Liang D, Corwin EJ, Ryan PB.	Environmental research	10.1016/j.envres.2021.111713
Atmospheric Fate of a New Polyfluoroalkyl Building Block, C(3)F(7)OCHFCF(2)SCH(2)CH(2)OH	Joudan S, Orlando JJ, Tyndall GS, Furlani TC, Young CJ, Mabury SA.	Environmental science & technology	10.1021/acs.est.0c07584
Atmospheric perfluoroalkyl acid occurrence and isomer profiles in Beijing, China	Wu J, Jin H, Li L, Zhai Z, Martin JW, Hu J, Peng L, Wu P.	Environmental pollution (Barking, Essex : 1987)	10.1016/j.envpol.2019.113129
Attenuation of Perfluorooctane Sulfonate-Induced Steatohepatitis by Grape Seed Proanthocyanidin Extract in Mice	Huang T, Zhang Y, Zhang W, Lin T, Chen L, Yang B, Wu L, Yang J, Zhang D.	BioMed research international	10.1155/2020/8818160
Autism spectrum disorders, endocrine disrupting compounds, and heavy metals in amniotic fluid: a case-control study	Long M, Ghisari M, Kjeldsen L, Wielsøe M, Nørgaard-Pedersen B, Mortensen EL, Abdallah MW, Bonefeld-Jørgensen EC.	Molecular autism	10.1186/s13229-018-0253-1
Automated detection of patellofemoral osteoarthritis from knee lateral view radiographs using deep learning: data from the Multicenter Osteoarthritis Study (MOST)	Bayramoglu N, Nieminen MT, Saarakkala S.	Osteoarthritis and cartilage	10.1016/j.joca.2021.06.011
Automating Predictive Toxicology Using ComptoxAI	Romano JD, Hao Y, Moore JH, Penning TM.	Chemical research in toxicology	10.1021/acs.chemrestox.2c00074
Autophagy mediates perfluorooctanoic acid-induced lipid metabolism disorder and NLRP3 inflammasome activation in hepatocytes	Weng Z, Xu C, Zhang X, Pang L, Xu J, Liu Q, Zhang L, Xu S, Gu A.	Environmental pollution (Barking, Essex : 1987)	10.1016/j.envpol.2020.115655
Avoiding pitfalls when modeling removal of per- and polyfluoroalkyl substances by anion exchange	Haupert LM, Pressman JG, Speth TF, Wahman DG.	AWWA water science	10.1002/aws2.1222
Background contamination of perfluoralkyl substances in a Belgian general population	Pirard C, Dufour P, Charlier C.	Toxicology letters	10.1016/j.toxlet.2020.07.015
Background per- and polyfluoroalkyl substances (PFAS) in laboratory fish diet: Implications for zebrafish toxicological studies	Cao D, Rericha Y, Powley C, Truong L, Tanguay RL, Field JA.	The Science of the total environment	10.1016/j.scitotenv.2022.156831
Bacterial community in a freshwater pond responding to the presence of perfluorooctanoic acid (PFOA)	Zhang D, Zhang W, Liang Y.	Environmental technology	10.1080/09593330.2019.1616828
Bayesian Estimation of Human Population Toxicokinetics of PFOA, PFOS, PFHxS, and PFNA from Studies of Contaminated Drinking Water	Chiu WA, Lynch MT, Lay CR, Antezana A, Malek P, Sokolinski S, Rogers RD.	Environmental health perspectives	10.1289/EHP10103
Bayesian evaluation of a physiologically based pharmacokinetic (PBPK) model for perfluorooctane sulfonate (PFOS) to characterize the interspecies uncertainty between mice, rats, monkeys, and humans: Development and performance verification	Chou WC, Lin Z.	Environment international	10.1016/j.envint.2019.03.058
Bayesian Refinement of the Permeability-Limited Physiologically Based Pharmacokinetic Model for Perfluorooctanoic Acid in Male Rats	Cheng W, Ng CA.	Chemical research in toxicology	10.1021/acs.chemrestox.1c00193
Behavior Effects of Structurally Diverse Per- and Polyfluoroalkyl Substances in Zebrafish	Rericha Y, Cao D, Truong L, Simonich M, Field JA, Tanguay RL.	Chemical research in toxicology	10.1021/acs.chemrestox.1c00101
Behaviors of 6:2 fluorotelomer sulfonamide alkylbetaine (6:2 FTAB) in wheat seedlings: Bioaccumulation, biotransformation and ecotoxicity	Zhao H, Yang L, Yang X, Zhao S.	Ecotoxicology and environmental safety	10.1016/j.ecoenv.2022.113585
Behavioural effects and bioconcentration of per- and polyfluoroalkyl substances (PFASs) in zebrafish (Danio rerio) embryos	Menger F, Pohl J, Ahrens L, Carlsson G, Örn S.	Chemosphere	10.1016/j.chemosphere.2019.125573
Benchmark dose calculations for PFAS exposure based on two data sets on immunotoxic effects	Budtz-Jørgensen E, Grandjean P.	Environmental health : a global access science source	10.1186/s12940-023-00985-w
Bile acid metabolism disorder mediates hepatotoxicity of Nafion by-product 2 and perfluorooctane sulfonate in male PPARα-KO mice	Wang Z, Zang L, Ren W, Guo H, Sheng N, Zhou X, Guo Y, Dai J.	The Science of the total environment	10.1016/j.scitotenv.2023.162579
Binding of serum albumin to perfluorooctanoic acid reduced cytotoxicity	Yang YD, Tian R, Lu N.	The Science of the total environment	10.1016/j.scitotenv.2023.162738
Binding specificities of estrogen receptor with perfluorinated compounds: A cross species comparison	Qiu Z, Qu K, Luan F, Liu Y, Zhu Y, Yuan Y, Li H, Zhang H, Hai Y, Zhao C.	Environment international	10.1016/j.envint.2019.105284
Bioaccumulation and impact of maternal PFAS offloading on egg biochemistry from wild-caught freshwater turtles (Emydura macquarii macquarii)	Beale DJ, Nilsson S, Bose U, Bourne N, Stockwell S, Broadbent JA, Gonzalez-Astudillo V, Braun C, Baddiley B, Limpus D, Walsh T, Vardy S.	The Science of the total environment	10.1016/j.scitotenv.2022.153019
Bioaccumulation and metabolic impact of environmental PFAS residue on wild-caught urban wetland tiger snakes (Notechis scutatus)	Lettoof DC, Nguyen TV, Richmond WR, Nice HE, Gagnon MM, Beale DJ.	The Science of the total environment	10.1016/j.scitotenv.2023.165260
Bioaccumulation and toxicity of perfluorooctanoic acid and perfluorooctane sulfonate in marine algae Chlorella sp	Mao W, Li M, Xue X, Cao W, Wang X, Xu F, Jiang W.	The Science of the total environment	10.1016/j.scitotenv.2023.161882
Bioaccumulation behavior and spatiotemporal trends of per- and polyfluoroalkyl substances in Indo-Pacific humpback dolphins from the Pearl River Estuary, China	Gui D, Zhang M, Zhang T, Zhang B, Lin W, Sun X, Yu X, Liu W, Wu Y.	The Science of the total environment	10.1016/j.scitotenv.2018.12.278
Bioaccumulation of Novel Per- and Polyfluoroalkyl Substances in Mice Dosed with an Aqueous Film-Forming Foam	McDonough CA, Choyke S, Ferguson PL, DeWitt JC, Higgins CP.	Environmental science & technology	10.1021/acs.est.0c00234
Bioaccumulation of per- and polyfluoroalkyl substances by freshwater benthic macroinvertebrates: Impact of species and sediment organic carbon content	Yun X, Lewis AJ, Stevens-King G, Sales CM, Spooner DE, Kurz MJ, Suri R, McKenzie ER.	The Science of the total environment	10.1016/j.scitotenv.2022.161208
Bioactivity profiling of per- and polyfluoroalkyl substances (PFAS) identifies potential toxicity pathways related to molecular structure	Houck KA, Patlewicz G, Richard AM, Williams AJ, Shobair MA, Smeltz M, Clifton MS, Wetmore B, Medvedev A, Makarov S.	Toxicology	10.1016/j.tox.2021.152789
Bioavailability, phytotoxicity and plant uptake of per-and polyfluoroalkyl substances (PFAS): A review	Adu O, Ma X, Sharma VK.	Journal of hazardous materials	10.1016/j.jhazmat.2023.130805
Biochemical aspects of susceptibility to stressors in two small cyprinids Squalius laietanus and Barbus meridionalis from the NW Mediterranean	Solé M, Lacorte S, Vinyoles D.	Comparative biochemistry and physiology. Toxicology & pharmacology : CBP	10.1016/j.cbpc.2020.108940
Biodegradation of per- and polyfluoroalkyl substances (PFAS): A review	Zhang Z, Sarkar D, Biswas JK, Datta R.	Bioresource technology	10.1016/j.biortech.2021.126223
Bioequivalence study followed by model-informed dose optimization of a powder for oral suspension of 6-mercaptopurine	Arun B, Joshi M, Kakkar AK, Madki S, Ivaturi V, Chinnaswamy G, Banavali S, Gota V.	Pediatric blood & cancer	10.1002/pbc.30813
Biomonitoring equivalents for perfluorooctanoic acid (PFOA) for the interpretation of biomonitoring data	Tewfik EL, Noisel N, Verner MA.	Environment international	10.1016/j.envint.2023.108170
Biomonitoring of 89 POPs in blood serum samples of Czech city policemen	Polachova A, Gramblicka T, Bechynska K, Parizek O, Parizkova D, Dvorakova D, Honkova K, Rossnerova A, Rossner P, Sram RJ, Topinka J, Pulkrabova J.	Environmental pollution (Barking, Essex : 1987)	10.1016/j.envpol.2021.118140
Biomonitoring of emerging contaminants, perfluoroalkyl and polyfluoroalkyl substances (PFAS), in New Jersey adults in 2016-2018	Yu CH, Riker CD, Lu SE, Fan ZT.	International journal of hygiene and environmental health	10.1016/j.ijheh.2019.10.008
Biomonitoring of per- and polyfluoroalkyl substances (PFAS) exposure in firefighters: Study design and lessons learned from stakeholder and participant engagement	Nilsson S, Smurthwaite K, Aylward LL, Kay M, Toms LM, King L, Marrington S, Hobson P, Barnes C, Rotander A, Kirk MD, Mueller JF, Braeunig J.	International journal of hygiene and environmental health	10.1016/j.ijheh.2022.113966
Biomonitoring of populations in Western New York at risk for exposure to Great Lakes contaminants	Savadatti SS, Liu M, Caglayan C, Reuther J, Lewis-Michl EL, Aldous KM, Parsons PJ, Kannan K, Rej R, Wang W, Palmer CD, Steuerwald AJ, Wattigney WA, Irvin-Barnwell E, Hwang SA.	Environmental research	10.1016/j.envres.2019.108690
Bioremediation of Per- and Poly-Fluoroalkyl Substances (PFAS) by Synechocystis sp. PCC 6803: A Chassis for a Synthetic Biology Approach	Marchetto F, Roverso M, Righetti D, Bogialli S, Filippini F, Bergantino E, Sforza E.	Life (Basel, Switzerland)	10.3390/life11121300
Biota-Sediment Accumulation Factors for Per- and Polyfluoroalkyl Substances	Burkhard LP, Votava LK.	Environmental toxicology and chemistry	10.1002/etc.5526
Biotransformation of 6:2 Fluorotelomer Thioether Amido Sulfonate in Aqueous Film-Forming Foams under Nitrate-Reducing Conditions	Yi S, Harding-Marjanovic KC, Houtz EF, Antell E, Olivares C, Nichiporuk RV, Iavarone AT, Zhuang WQ, Field JA, Sedlak DL, Alvarez-Cohen L.	Environmental science & technology	10.1021/acs.est.2c00063
Biotransformation of perfluoroalkyl acid precursors from various environmental systems: advances and perspectives	Zhang W, Pang S, Lin Z, Mishra S, Bhatt P, Chen S.	Environmental pollution (Barking, Essex : 1987)	10.1016/j.envpol.2020.115908
Biphasic effects of perfluorooctanoic acid on steroidogenesis in mouse Leydig tumour cells	Tian M, Huang Q, Wang H, Martin FL, Liu L, Zhang J, Shen H.	Reproductive toxicology (Elmsford, N.Y.)	10.1016/j.reprotox.2018.11.006
Bisphenol S enhances gap junction intercellular communication in ovarian theca cells	Gingrich J, Pu Y, Upham BL, Hulse M, Pearl S, Martin D, Avery A, Veiga-Lopez A.	Chemosphere	10.1016/j.chemosphere.2020.128304
Bisphenols and perfluoroalkyls alter human stem cells integrity: A possible link with infertility	Gaggi G, Di Credico A, Barbagallo F, Ghinassi B, Di Baldassarre A.	Environmental research	10.1016/j.envres.2023.116487
Blood concentrations of per- and polyfluoroalkyl substances are associated with autoimmune-like effects in American alligators from Wilmington, North Carolina	Guillette TC, Jackson TW, Guillette M, McCord J, Belcher SM.	Frontiers in toxicology	10.3389/ftox.2022.1010185
Blood levels of perfluoroalkyl substances (PFASs), elements and their associations with metabolic syndrome (MetS) in Chinese male adults mediated by metabolic-related risk factors	Yang Q, Guo X, Chen Y, Zhang W, Ren J, Wang J, Tang N, Gao A.	The Science of the total environment	10.1016/j.scitotenv.2020.140595
Blood transcriptome responses to PFOA and GenX treatment in the marsupial biomedical model Monodelphis domestica	Cao W, Horzmann K, Schemera B, Petrofski M, Kendall T, Spooner J, Rynders PE, VandeBerg JL, Wang X.	Frontiers in genetics	10.3389/fgene.2023.1073461
Blood Transcriptomics Analysis of Fish Exposed to Perfluoro Alkyls Substances: Assessment of a Non-Lethal Sampling Technique for Advancing Aquatic Toxicology Research	Rodríguez-Jorquera IA, Colli-Dula RC, Kroll K, Jayasinghe BS, Parachu Marco MV, Silva-Sanchez C, Toor GS, Denslow ND.	Environmental science & technology	10.1021/acs.est.8b03603
Blueberry anthocyanin alleviate perfluorooctanoic acid-induced toxicity in planarian (Dugesia japonica) by regulating oxidative stress biomarkers, ATP contents, DNA methylation and mRNA expression	Zhang J, Wang B, Zhao B, Li Y, Zhao X, Yuan Z.	Environmental pollution (Barking, Essex : 1987)	10.1016/j.envpol.2018.11.094
Boosting degradation and defluorination efficiencies of PFBS in a vacuum-ultraviolet/S(Ⅳ) process with iodide involvement	Li Y, Lv L, Yang L, He L, Chen Y, Wu L, Zhang Z.	Chemosphere	10.1016/j.chemosphere.2022.137531
Bovine oocyte exposure to perfluorohexane sulfonate (PFHxS) induces phenotypic, transcriptomic, and DNA methylation changes in resulting embryos in vitro	Hallberg I, Persson S, Olovsson M, Moberg M, Ranefall P, Laskowski D, Damdimopoulou P, Sirard MA, Rüegg J, Sjunnesson YCB.	Reproductive toxicology (Elmsford, N.Y.)	10.1016/j.reprotox.2022.02.004
Brain-derived neurotrophic factor (BDNF): an effect biomarker of neurodevelopment in human biomonitoring programs	Rodríguez-Carrillo A, Verheyen VJ, Van Nuijs ALN, Fernández MF, Remy S.	Frontiers in toxicology	10.3389/ftox.2023.1319788
Brazilian overview of per- and polyfluoroalkyl substances listed as persistent organic pollutants in the stockholm convention	Barbosa Machado Torres F, Guida Y, Weber R, Machado Torres JP.	Chemosphere	10.1016/j.chemosphere.2021.132674
Broad toxicological effects of per-/poly- fluoroalkyl substances (PFAS) on the unicellular eukaryote, Tetrahymena pyriformis	Lim J.	Environmental toxicology and pharmacology	10.1016/j.etap.2022.103954
Building Confidence in New Evidence Streams for Human Health Risk Assessment: Lessons Learned from Laboratory Mammalian Toxicity Tests	Book	Book	10.17226/26906
C57BL/6J mice exposed to perfluorooctanoic acid demonstrate altered immune responses and increased seizures after Theiler's murine encephalomyelitis virus infection	Pérez Gómez AA, Wang M, Kochan K, Amstalden K, Young CR, Welsh CJ, Phillips TD, Brinkmeyer-Langford CL.	Frontiers in immunology	10.3389/fimmu.2023.1228509
Calcitonin native prefibrillar oligomers but not monomers induce membrane damage that triggers NMDA-mediated Ca(2+)-influx, LTP impairment and neurotoxicity	Belfiore M, Cariati I, Matteucci A, Gaddini L, Macchia G, Fioravanti R, Frank C, Tancredi V, D'Arcangelo G, Diociaiuti M.	Scientific reports	10.1038/s41598-019-41462-0
Calcium signaling as a possible mechanism behind increased locomotor response in zebrafish larvae exposed to a human relevant persistent organic pollutant mixture or PFOS	Christou M, Fraser TWK, Berg V, Ropstad E, Kamstra JH.	Environmental research	10.1016/j.envres.2020.109702
Calibration of organic-diffusive gradients in thin films (o-DGT) passive samplers for perfluorinated alkyl acids in water	Wang P, Challis JK, Luong KH, Vera TC, Wong CS.	Chemosphere	10.1016/j.chemosphere.2020.128325
Can oral toxicity data for PFAS inform on toxicity via inhalation?	Monnot AD, Massarsky A, Garnick L, Bandara SB, Unice KM.	Risk analysis : an official publication of the Society for Risk Analysis	10.1111/risa.14039
Can sustained exposure to PFAS trigger a genotoxic response? A comprehensive genotoxicity assessment in mice after subacute oral administration of PFOA and PFBA	Crebelli R, Caiola S, Conti L, Cordelli E, De Luca G, Dellatte E, Eleuteri P, Iacovella N, Leopardi P, Marcon F, Sanchez M, Sestili P, Siniscalchi E, Villani P.	Regulatory toxicology and pharmacology : RTP	10.1016/j.yrtph.2019.05.005
Cancer incidence in a Swedish cohort with high exposure to perfluoroalkyl substances in drinking water	Li H, Hammarstrand S, Midberg B, Xu Y, Li Y, Olsson DS, Fletcher T, Jakobsson K, Andersson EM.	Environmental research	10.1016/j.envres.2021.112217
Cannabidiol Alleviates Perfluorooctanesulfonic Acid-Induced Cardiomyocyte Apoptosis by Maintaining Mitochondrial Dynamic Balance and Energy Metabolic Homeostasis	Wang X, Xu T, Luo D, Li S, Tang X, Ding J, Yin H, Li S.	Journal of agricultural and food chemistry	10.1021/acs.jafc.2c08378
Capabilities of bio-binding, antioxidant and intestinal environmental repair jointly determine the ability of lactic acid bacteria to mitigate perfluorooctane sulfonate toxicity	Chen Q, Sun S, Mei C, Zhao J, Zhang H, Wang G, Chen W.	Environment international	10.1016/j.envint.2022.107388
Capturing Weak Interactions in Surface Adsorbate Systems at Coupled Cluster Accuracy: A Graph-Theoretic Molecular Fragmentation Approach Improved through Machine Learning	Ricard TC, Zhu X, Iyengar SS.	Journal of chemical theory and computation	10.1021/acs.jctc.3c00955
Cardiometabolic health and per and polyfluoroalkyl substances in an Inuit population	Aker A, Ayotte P, Caron-Beaudoin É, Ricard S, Gaudreau É, Lemire M.	Environment international	10.1016/j.envint.2023.108283
Category-Based Toxicokinetic Evaluations of Data-Poor Per- and Polyfluoroalkyl Substances (PFAS) using Gas Chromatography Coupled with Mass Spectrometry	Kreutz A, Clifton MS, Henderson WM, Smeltz MG, Phillips M, Wambaugh JF, Wetmore BA.	Toxics	10.3390/toxics11050463
Cell cycle alterations due to perfluoroalkyl substances PFOS, PFOA, PFBS, PFBA and the new PFAS C6O4 on bottlenose dolphin (Tursiops truncatus) skin cell	Otero-Sabio C, Giacomello M, Centelleghe C, Caicci F, Bonato M, Venerando A, Graïc JM, Mazzariol S, Finos L, Corain L, Peruffo A.	Ecotoxicology and environmental safety	10.1016/j.ecoenv.2022.113980
Cellular Interactions and Fatty Acid Transporter CD36-Mediated Uptake of Per- and Polyfluorinated Alkyl Substances (PFAS)	Camdzic M, Aga DS, Atilla-Gokcumen GE.	Chemical research in toxicology	10.1021/acs.chemrestox.2c00078
Centurial Persistence of Forever Chemicals at Military Fire Training Sites	Ruyle BJ, Thackray CP, Butt CM, LeBlanc DR, Tokranov AK, Vecitis CD, Sunderland EM.	Environmental science & technology	10.1021/acs.est.3c00675
Characteristic and human exposure risk assessment of per- and polyfluoroalkyl substances: A study based on indoor dust and drinking water in China	Ao J, Yuan T, Xia H, Ma Y, Shen Z, Shi R, Tian Y, Zhang J, Ding W, Gao L, Zhao X, Yu X.	Environmental pollution (Barking, Essex : 1987)	10.1016/j.envpol.2019.07.041
Characterization of non-radiolabeled Thyroxine (T(4)) uptake in cryopreserved rat hepatocyte suspensions: Pharmacokinetic implications for PFOA and PFOS chemical exposure	Selano J, Richardson V, Washington J, Mazur C.	Toxicology in vitro : an international journal published in association with BIBRA	10.1016/j.tiv.2019.03.022
Characterization of PFAS air emissions from thermal application of fluoropolymer dispersions on fabrics	Wickersham LC, Mattila JM, Krug JD, Jackson SR, Wallace MAG, Shields EP, Halliday H, Li EY, Liberatore HK, Farrior SM, Preston W, Ryan JV, Lee CW, Linak WP.	Journal of the Air & Waste Management Association (1995)	10.1080/10962247.2023.2192009
Characterization of PFOS toxicity on in-vivo and ex-vivo mouse pancreatic islets	Wan HT, Cheung LY, Chan TF, Li M, Lai KP, Wong CKC.	Environmental pollution (Barking, Essex : 1987)	10.1016/j.envpol.2021.117857
Characterizing the Air Emissions, Transport, and Deposition of Per- and Polyfluoroalkyl Substances from a Fluoropolymer Manufacturing Facility	D'Ambro EL, Pye HOT, Bash JO, Bowyer J, Allen C, Efstathiou C, Gilliam RC, Reynolds L, Talgo K, Murphy BN.	Environmental science & technology	10.1021/acs.est.0c06580
Characterizing the long-term occurrence and anthropogenic drivers of per- and polyfluoroalkyl substances in surface water of the Rhine River	Li H, Zhu X, Zhang J, Wang Z, Li R.	Water research	10.1016/j.watres.2023.120528
Chemical Characterization of a Legacy Aqueous Film-Forming Foam Sample and Developmental Toxicity in Zebrafish (Danio rerio)	Annunziato KM, Doherty J, Lee J, Clark JM, Liang W, Clark CW, Nguyen M, Roy MA, Timme-Laragy AR.	Environmental health perspectives	10.1289/EHP6470
ChemMaps.com v2.0: exploring the environmental chemical universe	Borrel A, Conway M, Nolte SZ, Unnikrishnan A, Schmitt CP, Kleinstreuer NC.	Nucleic acids research	10.1093/nar/gkad380
Chemoproteomic Approach toward Probing the Interactomes of Perfluoroalkyl Substances	Zhang Q, Dong X, Lu J, Song J, Wang Y.		10.1021/acs.analchem.1c01948
Childhood exposure to per- and polyfluoroalkyl substances (PFAS) and neurobehavioral domains in children at age 8 years	Vuong AM, Yolton K, Xie C, Dietrich KN, Braun JM, Webster GM, Calafat AM, Lanphear BP, Chen A.	Neurotoxicology and teratology	10.1016/j.ntt.2021.107022
Childhood exposure to per- and polyfluoroalkyl substances and neurodevelopment in the CHARGE case-control study	Oh J, Shin HM, Kannan K, Busgang SA, Schmidt RJ, Schweitzer JB, Hertz-Picciotto I, Bennett DH.	Environmental research	10.1016/j.envres.2022.114322
Children's exposure to perfluoroalkyl acids - a modelling approach	Balk FGP, Winkens Pütz K, Ribbenstedt A, Gomis MI, Filipovic M, Cousins IT.	Environmental science. Processes & impacts	10.1039/c9em00323a
Chlorinated polyfluoroalkyl ether sulfonic acids in fish, dust, drinking water and human serum: From external exposure to internal doses	Wang Y, Li X, Zheng Z, Shi Y, Cai Y.	Environment international	10.1016/j.envint.2021.106820
Cholesterol-like Condensing Effect of Perfluoroalkyl Substances on a Phospholipid Bilayer	Shen Z, Ge J, Ye H, Tang S, Li Y.	The journal of physical chemistry. B	10.1021/acs.jpcb.0c00980
Chronic aquatic toxicity of perfluorooctane sulfonic acid (PFOS) to Ceriodaphnia dubia, Chironomus dilutus, Danio rerio, and Hyalella azteca	Krupa PM, Lotufo GR, Mylroie EJ, May LK, Gust KA, Kimble AN, Jung MG, Boyda JA, Garcia-Reyero N, Moore DW.	Ecotoxicology and environmental safety	10.1016/j.ecoenv.2022.113838
Chronic exposure to 6:2 chlorinated polyfluorinated ether sulfonate acid (F-53B) induced hepatotoxic effects in adult zebrafish and disrupted the PPAR signaling pathway in their offspring	Shi G, Cui Q, Wang J, Guo H, Pan Y, Sheng N, Guo Y, Dai J.	Environmental pollution (Barking, Essex : 1987)	10.1016/j.envpol.2019.03.032
Chronic Exposure to a PFAS Mixture Resembling AFFF-Impacted Surface Water Decreases Body Size in Northern Leopard Frogs (Rana pipiens)	Hoskins TD, Flynn RW, Coogan GSM, Catlin AC, de Perre C, Modiri Gharehveran M, Choi YJ, Lee LS, Hoverman JT, Sepúlveda MS.	Environmental science & technology	10.1021/acs.est.3c01118
Chronic feeding exposure to virgin and spiked microplastics disrupts essential biological functions in teleost fish	Cormier B, Le Bihanic F, Cabar M, Crebassa JC, Blanc M, Larsson M, Dubocq F, Yeung L, Clérandeau C, Keiter SH, Cachot J, Bégout ML, Cousin X.	Journal of hazardous materials	10.1016/j.jhazmat.2021.125626
Chronic Per-/Polyfluoroalkyl Substance Exposure Under Environmentally Relevant Conditions Delays Development in Northern Leopard Frog (Rana pipiens) Larvae	Flynn RW, Iacchetta M, de Perre C, Lee L, Sepúlveda MS, Hoverman JT.	Environmental toxicology and chemistry	10.1002/etc.4690
Chronic PFOA exposure in vitro causes acquisition of multiple tumor cell characteristics in rat liver cells	Qu W, Yan Y, Gerrish K, Scappini E, Tucker CJ, Dixon D, Merrick BA.	Toxicology in vitro : an international journal published in association with BIBRA	10.1016/j.tiv.2023.105577
Chronic Reproductive Toxicity of Perfluorooctane Sulfonic Acid and a Simple Mixture of Perfluorooctane Sulfonic Acid and Perfluorohexane Sulfonic Acid to Northern Bobwhite Quail (Colinus virginianus)	Dennis NM, Karnjanapiboonwong A, Subbiah S, Rewerts JN, Field JA, McCarthy C, Salice CJ, Anderson TA.	Environmental toxicology and chemistry	10.1002/etc.4703
Chronic Reproductive Toxicity Thresholds for Northern Bobwhite Quail (Colinus virginianus) Exposed to Perfluorohexanoic Acid (PFHxA) and a Mixture of Perfluorooctane Sulfonic Acid (PFOS) and PFHxA	Dennis NM, Hossain F, Subbiah S, Karnjanapiboonwong A, Dennis ML, McCarthy C, Heron CG, Jackson WA, Crago JP, Field JA, Salice CJ, Anderson TA.	Environmental toxicology and chemistry	10.1002/etc.5135
Chronic toxicity of PFAS-free AFFF alternatives in terrestrial plant Brassica rapa	Wu X, Nguyen H, Kim D, Peng H.	The Science of the total environment	10.1016/j.scitotenv.2022.158100
Clinical features of aflatoxin B1-exposed patients with liver cancer and the molecular mechanism of aflatoxin B1 on liver cancer cells	Zhou R, Liu M, Liang X, Su M, Li R.	Environmental toxicology and pharmacology	10.1016/j.etap.2019.103225
Combined effects and toxicological interactions of perfluoroalkyl and polyfluoroalkyl substances mixtures in human liver cells (HepG2)	Ojo AF, Peng C, Ng JC.	Environmental pollution (Barking, Essex : 1987)	10.1016/j.envpol.2020.114182
Combined effects of BPA and PFOS on fetal cardiac development: In vitro and in vivo experiments	Zhou R, Cheng W, Feng Y, Wang W, Liang F, Luo F, Yang S, Wang Y.	Environmental toxicology and pharmacology	10.1016/j.etap.2020.103434
Combined effects of mixed per- and polyfluoroalkyl substances on the Nrf2-ARE pathway in ARE reporter-HepG2 cells	Ojo AF, Peng C, Ng JC.	Journal of hazardous materials	10.1016/j.jhazmat.2021.126827
Combined toxic effects of perfluorooctanoic acid and microcystin-LR on submerged macrophytes and biofilms	Yang Y, Li Q, Shen Y, Wei R, Lan Y, Wang Q, Lei N, Xie Y.	Journal of hazardous materials	10.1016/j.jhazmat.2023.132193
Combined toxic effects of polypropylene and perfluorooctanoic acid on duckweed and periphytic microorganisms	Li Q, Jiang J, Lan Y, Kang S, Yang Y, Zhang J.	Environmental science and pollution research international	10.1007/s11356-023-30006-9
Combustion of C(1) and C(2) PFAS: Kinetic modeling and experiments	Krug JD, Lemieux PM, Lee CW, Ryan JV, Kariher PH, Shields EP, Wickersham LC, Denison MK, Davis KA, Swensen DA, Burnette RP, Wendt JOL, Linak WP.	Journal of the Air & Waste Management Association (1995)	10.1080/10962247.2021.2021317
Comment on "Internal Relative Potency Factors for the Risk Assessment of Mixtures of Per- and Polyfluoroalkyl Substances (PFAS) in Human Biomonitoring"	Andra SS, Teitelbaum SL, Wolff MS.	Environmental health perspectives	10.1289/EHP12062
Comment on "Maternal Exposure to Per- and Polyfluoroalkyl Substances (PFAS) and Male Reproductive Function in Young Adulthood: Combined Exposure to Seven PFAS"	Abraham K.	Environmental health perspectives	10.1289/EHP12457
Commentary: cumulative risk assessment of perfluoroalkyl carboxylic acids and perfluoralkyl sulfonic acids: what is the scientific support for deriving tolerable exposures by assembling 27 PFAS into 1 common assessment group?	Colnot T, Dekant W.	Archives of toxicology	10.1007/s00204-022-03336-9
Communicating Confidence of Per- and Polyfluoroalkyl Substance Identification via High-Resolution Mass Spectrometry	Charbonnet JA, McDonough CA, Xiao F, Schwichtenberg T, Cao D, Kaserzon S, Thomas KV, Dewapriya P, Place BJ, Schymanski EL, Field JA, Helbling DE, Higgins CP.	Environmental science & technology letters	10.1021/acs.estlett.2c00206
Community-facing toxicokineticmodels to estimate PFAS serum levels based on life history and drinking water exposures	Lynch MT, Lay CR, Sokolinski S, Antezana A, Ghio C, Chiu WA, Rogers R.	Environment international	10.1016/j.envint.2023.107974
Comparative Analysis of PFOS and PFOA Toxicity on Sertoli Cells	Wan HT, Lai KP, Wong CKC.	Environmental science & technology	10.1021/acs.est.0c00201
Comparative analysis of the physicochemical, toxicokinetic, and toxicological properties of ether-PFAS	Rice PA, Cooper J, Koh-Fallet SE, Kabadi SV.	Toxicology and applied pharmacology	10.1016/j.taap.2021.115531
Comparative analysis of the toxicological databases for 6:2 fluorotelomer alcohol (6:2 FTOH) and perfluorohexanoic acid (PFHxA)	Rice PA, Aungst J, Cooper J, Bandele O, Kabadi SV.	Food and chemical toxicology : an international journal published for the British Industrial Biological Research Association	10.1016/j.fct.2020.111210
Comparative chronic toxicities of PFOS and its novel alternatives on the immune system associated with intestinal microbiota dysbiosis in adult zebrafish	Huang J, Wang Q, Liu S, Lai H, Tu W.	Journal of hazardous materials	10.1016/j.jhazmat.2021.127950
Comparative cytotoxicity of seven per- and polyfluoroalkyl substances (PFAS) in six human cell lines	Solan ME, Senthilkumar S, Aquino GV, Bruce ED, Lavado R.	Toxicology	10.1016/j.tox.2022.153281
Comparative developmental toxicities of zebrafish towards structurally diverse per- and polyfluoroalkyl substances	Gui W, Guo H, Wang C, Li M, Jin Y, Zhang K, Dai J, Zhao Y.	The Science of the total environment	10.1016/j.scitotenv.2023.166569
Comparative Evaluation of the Effects of Legacy and New Generation Perfluoralkyl Substances (PFAS) on Thyroid Cells In Vitro	De Toni L, Di Nisio A, Rocca MS, Pedrucci F, Garolla A, Dall'Acqua S, Guidolin D, Ferlin A, Foresta C.	Frontiers in endocrinology	10.3389/fendo.2022.915096
Comparative Hepatotoxicity of a Novel Perfluoroalkyl Ether Sulfonic Acid, Nafion Byproduct 2 (H-PFMO2OSA), and Legacy Perfluorooctane Sulfonate (PFOS) in Adult Male Mice	Wang Z, Yao J, Guo H, Sheng N, Guo Y, Dai J.	Environmental science & technology	10.1021/acs.est.2c00957
Comparative in Vitro and in Vivo Evaluation of the Estrogenic Effect of Hexafluoropropylene Oxide Homologues	Xin Y, Ren XM, Wan B, Guo LH.	Environmental science & technology	10.1021/acs.est.9b01579
Comparative stress response assessment of PFOS and its alternatives, F-53B and OBS, in wheat: An insight of toxic mechanisms and relative magnitudes	Li X, Wang Z, Ge Y, Sun H, Zhang L.	Ecotoxicology and environmental safety	10.1016/j.ecoenv.2023.115333
Comparative study of per- and polyfluoroalkyl substances (PFAS) removal from landfill leachate	Malovanyy A, Hedman F, Bergh L, Liljeros E, Lund T, Suokko J, Hinrichsen H.	Journal of hazardous materials	10.1016/j.jhazmat.2023.132505
Comparative Toxicity of Aquatic Per- and Polyfluoroalkyl Substance Exposure in Three Species of Amphibians	Flynn RW, Hoover G, Iacchetta M, Guffey S, de Perre C, Huerta B, Li W, Hoverman JT, Lee L, Sepúlveda MS.	Environmental toxicology and chemistry	10.1002/etc.5319
Comparative Toxicity of Seven Aqueous Film-Forming Foam to In Vitro Systems and Mus	East AG, Narizzano AM, Holden LA, Bazar MA, Bohannon ME, Pervitsky D, Adams VH, Reinke EN, Quinn MJ Jr.	Environmental toxicology and chemistry	10.1002/etc.5714
Comparative toxicokinetics and toxicity of PFOA and its replacement GenX in the early stages of zebrafish	Satbhai K, Vogs C, Crago J.	Chemosphere	10.1016/j.chemosphere.2022.136131
Comparative Toxicological Effects of Perfluorooctane Sulfonate and Its Alternative 6:2 Chlorinated Polyfluorinated Ether Sulfonate on Earthworms	Ge Y, Wang Z, Chen X, Wang W, Liu Z, Sun H, Zhang L.	Environmental toxicology and chemistry	10.1002/etc.5774
Comparative toxicometabolomics of perfluorooctanoic acid (PFOA) and next-generation perfluoroalkyl substances	Gebreab KY, Eeza MNH, Bai T, Zuberi Z, Matysik J, O'Shea KE, Alia A, Berry JP.	Environmental pollution (Barking, Essex : 1987)	10.1016/j.envpol.2020.114928
Comparing Ocular Toxicity of Legacy and Alternative Per- and Polyfluoroalkyl Substances in Zebrafish Larvae	Lee HS, Jang S, Eom Y, Kim KT.	Toxics	10.3390/toxics11121021
Comparison of 6:2 chlorinated polyfluorinated ether sulfonate (6:2 Cl-PFESA) and perfluorooctane sulfonate (PFOS) accumulation and toxicity in mung bean	Pan Y, Wen B, Zhang H, Zhang S.	Environmental pollution (Barking, Essex : 1987)	10.1016/j.envpol.2021.117332
Comparison of developmental toxicity induced by PFOA, HFPO-DA, and HFPO-TA in zebrafish embryos	Wang Y, Jiang S, Wang B, Chen X, Lu G.	Chemosphere	10.1016/j.chemosphere.2022.136999
Comparison of methods to estimate air-water interfacial areas for evaluating PFAS transport in the vadose zone	Silva JAK, Šimůnek J, McCray JE.	Journal of contaminant hydrology	10.1016/j.jconhyd.2022.103984
Comparison of Perfluorocarbon Liquids Cytotoxicity Tests: Direct Contact Versus the Test on Liquid Extracts	Gatto C, Ruzza P, Giurgola L, Honisch C, Rossi O, Romano MR, Ragazzi E, D'Amato Tóthová J.	ACS omega	10.1021/acsomega.2c04697
Comparison of sub-lethal metabolic perturbations of select legacy and novel perfluorinated alkyl substances (PFAS) in Daphnia magna	Labine LM, Oliveira Pereira EA, Kleywegt S, Jobst KJ, Simpson AJ, Simpson MJ.	Environmental research	10.1016/j.envres.2022.113582
Comparison of the PFAS and physical-chemical parameter fluctuations between an ash landfill and a MSW landfill	Zhang H, Chen Y, Liu Y, Bowden JA, Townsend TG, Solo-Gabriele HM.	Waste management (New York, N.Y.)	10.1016/j.wasman.2023.12.027
Comparison of toxicokinetics and toxic effects of PFOS and its novel alternative OBS in zebrafish larvae	Zou Y, Wu Y, Wang Q, Wan J, Deng M, Tu W.	Chemosphere	10.1016/j.chemosphere.2020.129116
Comparison of zebrafish in vitro and in vivo developmental toxicity assessments of perfluoroalkyl acids (PFAAs)	Wasel O, Thompson KM, Gao Y, Godfrey AE, Gao J, Mahapatra CT, Lee LS, Sepúlveda MS, Freeman JL.	Journal of toxicology and environmental health. Part A	10.1080/15287394.2020.1842272
Comparisons of tissue distributions and health risks of perfluoroalkyl acids (PFAAs) in two fish species with different trophic levels from Lake Chaohu, China	Wu JY, Liu WX, He W, Xu FL.	Ecotoxicology and environmental safety	10.1016/j.ecoenv.2019.109666
Complete defluorination of perfluorooctanoic acid (PFOA) by ultrasonic pyrolysis towards zero fluoro-pollution	Xiong X, Shang Y, Bai L, Luo S, Seviour TW, Guo Z, Ottosen LDM, Wei Z.	Water research	10.1016/j.watres.2023.119829
Complex relationships between perfluorooctanoate, body mass index, insulin resistance and serum lipids in young girls	Fassler CS, Pinney SE, Xie C, Biro FM, Pinney SM.	Environmental research	10.1016/j.envres.2019.108558
Comprehending the Role of Endocrine Disruptors in Inducing Epigenetic Toxicity	Kirtana A, Seetharaman B.	Endocrine, metabolic & immune disorders drug targets	10.2174/1871530322666220411082656
Comprehensive Exposure Studies of Per- and Polyfluoroalkyl Substances in the General Population: Target, Nontarget Screening, and Toxicity Prediction	Li L, Yu N, Wang X, Shi W, Liu H, Zhang X, Yang L, Pan B, Yu H, Wei S.	Environmental science & technology	10.1021/acs.est.2c03345
Comprehensive multi-omics approaches reveal the hepatotoxic mechanism of perfluorohexanoic acid (PFHxA) in mice	Jiang L, Hong Y, Xie G, Zhang J, Zhang H, Cai Z.	The Science of the total environment	10.1016/j.scitotenv.2021.148160
Comprehensive profiles of per- and polyfluoroalkyl substances in Chinese and African municipal wastewater treatment plants: New implications for removal efficiency	Jiang L, Yao J, Ren G, Sheng N, Guo Y, Dai J, Pan Y.	The Science of the total environment	10.1016/j.scitotenv.2022.159638
Computational estimates of daily aggregate exposure to PFOA/PFOS from 2011 to 2017 using a basic intake model	East A, Egeghy PP, Hubal EAC, Slover R, Vallero DA.	Journal of exposure science & environmental epidemiology	10.1038/s41370-021-00374-w
Computational Modeling of Human Serum Albumin Binding of Per- and Polyfluoroalkyl Substances Employing QSAR, Read-Across, and Docking	Gallagher A, Kar S, Sepúlveda MS.	Molecules (Basel, Switzerland)	10.3390/molecules28145375
Computational systems biology as an animal-free approach to characterize toxicological effects of persistent organic pollutants	Wu Q, Achebouche R, Audouze K.	ALTEX	10.14573/altex.1910161
Concentration and distribution of metals, total fluorine, per- and poly-fluoroalkyl substances (PFAS) in vertical soil profiles in industrialized areas	Gan CD, Peng MY, Liu HB, Yang JY.	Chemosphere	10.1016/j.chemosphere.2022.134855
Concentration- and nutrient-dependent cellular responses of microalgae Chlorella pyrenoidosa to perfluorooctanoic acid	Hu Y, Meng FL, Hu YY, Habibul N, Sheng GP.	Water research	10.1016/j.watres.2020.116248
Concentration of selected liver enzymes across the stages of glomerular function: the associations with PFOA and PFOS	Jain RB.	Heliyon	10.1016/j.heliyon.2019.e02168
Concentration-dependent toxicokinetics of novel PFOS alternatives and their chronic combined toxicity in adult zebrafish	Huang J, Liu Y, Wang Q, Yi J, Lai H, Sun L, Mennigen JA, Tu W.	The Science of the total environment	10.1016/j.scitotenv.2022.156388
Concentrations of per- and polyfluoroalkyl substances (PFAS) in human placental tissues and associations with birth outcomes	Hall SM, Zhang S, Hoffman K, Miranda ML, Stapleton HM.	Chemosphere	10.1016/j.chemosphere.2022.133873
Concentrations of per- and polyfluoroalkyl substances (PFAS) in paired tap water and blood samples during pregnancy	Cserbik D, Casas M, Flores C, Paraian A, Haug LS, Rivas I, Bustamante M, Dadvand P, Sunyer J, Vrijheid M, Villanueva CM.	Journal of exposure science & environmental epidemiology	10.1038/s41370-023-00581-7
Concentrations of perfluoroalkyl and polyfluoroalkyl substances before and after full-scale landfill leachate treatment	Chen Y, Zhang H, Liu Y, Bowden JA, Tolaymat TM, Townsend TG, Solo-Gabriele HM.	Waste management (New York, N.Y.)	10.1016/j.wasman.2022.08.024
Concentrations of perfluoroalkyl substances (PFASs) in human embryonic and fetal organs from first, second, and third trimester pregnancies	Mamsen LS, Björvang RD, Mucs D, Vinnars MT, Papadogiannakis N, Lindh CH, Andersen CY, Damdimopoulou P.	Environment international	10.1016/j.envint.2019.01.010
Conducting evaluations of evidence that are transparent, timely and can lead to health-protective actions	Chartres N, Sass JB, Gee D, Bălan SA, Birnbaum L, Cogliano VJ, Cooper C, Fedinick KP, Harrison RM, Kolossa-Gehring M, Mandrioli D, Mitchell MA, Norris SL, Portier CJ, Straif K, Vermeire T.	Environmental health : a global access science source	10.1186/s12940-022-00926-z
Confirming sulfluramid (EtFOSA) application as a precursor of perfluorooctanesulfonic acid (PFOS) in Brazilian agricultural soils	Guida Y, Torres FBM, Barizon RRM, Assalin MR, Rosa MA.	Chemosphere	10.1016/j.chemosphere.2023.138370
Considerations for toxicity experiments and risk assessments with PFAS mixtures	McCarthy CJ, Roark SA, Middleton ET.	Integrated environmental assessment and management	10.1002/ieam.4415
Considering environmental exposures to per- and polyfluoroalkyl substances (PFAS) as risk factors for hypertensive disorders of pregnancy	Erinc A, Davis MB, Padmanabhan V, Langen E, Goodrich JM.	Environmental research	10.1016/j.envres.2021.111113
Consumption of freshwater fish: A variable but significant risk factor for PFOS exposure	Augustsson A, Lennqvist T, Osbeck CMG, Tibblin P, Glynn A, Nguyen MA, Westberg E, Vestergren R.	Environmental research	10.1016/j.envres.2020.110284
Contact to perfluoroalkyl substances and thyroid health effects: A meta-analysis directing on pregnancy	Zhang L, Liang J, Gao A.	Chemosphere	10.1016/j.chemosphere.2023.137748
Contaminant levels and endocrine disruptive effects in Clarias gariepinus exposed to simulated leachate from a solid waste dumpsite in Calabar, Nigeria	Ibor OR, Andem AB, Eni G, Arong GA, Adeougn AO, Arukwe A.	Aquatic toxicology (Amsterdam, Netherlands)	10.1016/j.aquatox.2019.105375
Contaminants of Emerging Concern in the Lower Volta River, Ghana, West Africa: The Agriculture, Aquaculture, and Urban Development Nexus	Huff Chester A, Gordon C, Hartmann HA, Bartell SE, Ansah E, Yan T, Li B, Dampha NK, Edmiston PL, Novak PJ, Schoenfuss HL.	Environmental toxicology and chemistry	10.1002/etc.5279
Contribution of air-water interface in removing PFAS from drinking water: Adsorption, stability, interaction and machine learning studies	Yuan S, Wang X, Jiang Z, Zhang H, Yuan S.	Water research	10.1016/j.watres.2023.119947
Contribution of Nonaqueous-Phase Liquids to the Retention and Transport of Per and Polyfluoroalkyl Substances (PFAS) in Porous Media	Van Glubt S, Brusseau ML.	Environmental science & technology	10.1021/acs.est.0c07355
Co-occurrence of phthalate esters and perfluoroalkyl substances affected bacterial community and pathogenic bacteria growth in rural drinking water distribution systems	Yin H, Chen R, Wang H, Schwarz C, Hu H, Shi B, Wang Y.	The Science of the total environment	10.1016/j.scitotenv.2022.158943
Correction to Developmental Toxicity of Perfluorooctanesulfonate (PFOS) and Its Chlorinated Polyfluoroalkyl Ether Sulfonate Alternative F-53B in the Domestic Chicken	Briels N, Ciesielski TM, Herzke D, Jaspers VLB.	Environmental science & technology	10.1021/acs.est.9b05021
Correction: Woodlief et al. Immunotoxicity of Per- and Polyfluoroalkyl Substances: Insights into Short-Chain PFAS Exposure. Toxics 2021, 9, 100	Woodlief T, Vance S, Hu Q, DeWitt J.	Toxics	10.3390/toxics11080656
Correlation analysis between per-fluoroalkyl and poly-fluoroalkyl substances exposure and depressive symptoms in adults: NHANES 2005-2018	Sun X, Yang X, Zhang Y, Liu Y, Xiao F, Guo H, Liu X.	The Science of the total environment	10.1016/j.scitotenv.2023.167639
Correlation Analysis of Perfluoroalkyl Substances in Regional U.S. Precipitation Events	Pike KA, Edmiston PL, Morrison JJ, Faust JA.	Water research	10.1016/j.watres.2020.116685
Correlations between Per- and Polyfluoroalkyl Substances and Body Morphometrics in Fledgling Shearwaters Impacted by Plastic Consumption from a Remote Pacific Island	Szabo D, Lavers JL, Shimeta J, Green MP, Mulder RA, Clarke BO.	Environmental toxicology and chemistry	10.1002/etc.4924
Corrigendum to "Reproductive and developmental toxicity of perfluorooctane sulfonate (PFOS) in the white-footed mouse (Peromyscus leucopus)" [Reprod. Toxicol. 113 (2020) 120-127]	Narizzano AM, Lent EM, Hanson JM, East AG, Bohannon ME, Quinn MJ Jr.	Reproductive toxicology (Elmsford, N.Y.)	10.1016/j.reprotox.2022.10.004
Corrigendum to "Toxicokinetics of perfluorobutane sulfonate (PFBS), perfluorohexane-1-sulphonic acid (PFHxS), and perfluorooctane sulfonic acid (PFOS) in male and female Hsd:Sprague Dawley SD rats after intravenous and gavage administration" [Toxicol. Rep. 6 (2019) 645-655]	Huang MC, Dzierlenga AL, Robinson VG, Waidyanatha S, DeVito MJ, Eifrid MA, Granville CA, Gibbs ST, Blystone CR.	Toxicology reports	10.1016/j.toxrep.2021.02.001
Critical endpoints of PFOA and PFOS exposure for regulatory risk assessment in drinking water: Parameter choices impacting estimates of safe exposure levels	Perez A, Lumpkin M, Kornberg T, Schmidt A.	Regulatory toxicology and pharmacology : RTP	10.1016/j.yrtph.2022.105323
Critical review on PFOA, kidney cancer, and testicular cancer	Bartell SM, Vieira VM.	Journal of the Air & Waste Management Association (1995)	10.1080/10962247.2021.1909668
Critical review on PFOA, kidney cancer, and testicular cancer	Stevenson ED, Kleinman MT, Bai X, Barlaz M, Abraczinskas M, Guidry V, Watson J, Chow J.	Journal of the Air & Waste Management Association (1995)	10.1080/10962247.2021.1975995
Cross-sectional associations between prenatal maternal per- and poly-fluoroalkyl substances and bioactive lipids in three Environmental influences on Child Health Outcomes (ECHO) cohorts	Suthar H, Manea T, Pak D, Woodbury M, Eick SM, Cathey A, Watkins DJ, Strakovsky RS, Ryva BA, Pennathur S, Zeng L, Weller D, Park JS, Smith S, DeMicco E, Padula A, Fry RC, Mukherjee B, Aguiar A, Dee Geiger S, Ng S, Huerta-Montanez G, Vélez-Vega C, Rosario Z, Cordero JF, Zimmerman E, Woodruff TJ, Morello-Frosch R, Schantz SL, Meeker JD, Alshawabkeh A, Aung MT.		10.1101/2023.11.03.23297930
Cross-sectional associations between serum PFASs and inflammatory biomarkers in a population exposed to AFFF-contaminated drinking water	Barton KE, Zell-Baran LM, DeWitt JC, Brindley S, McDonough CA, Higgins CP, Adgate JL, Starling AP.	International journal of hygiene and environmental health	10.1016/j.ijheh.2021.113905
Cross-sectional associations of maternal PFAS exposure on SARS-CoV-2 IgG antibody levels during pregnancy	Kaur K, Lesseur C, Chen L, Andra SS, Narasimhan S, Pulivarthi D, Midya V, Ma Y, Ibroci E, Gigase F, Lieber M, Lieb W, Janevic T, De Witte LD, Bergink V, Rommel AS, Chen J.	Environmental research	10.1016/j.envres.2022.115067
Cross-sectional study of the association between serum perfluorinated alkyl acid concentrations and dental caries among US adolescents (NHANES 1999-2012)	Puttige Ramesh N, Arora M, Braun JM.	BMJ open	10.1136/bmjopen-2018-024189
Cumulative maternal and neonatal effects of combined exposure to a mixture of perfluorooctanoic acid (PFOA) and perfluorooctane sulfonic acid (PFOS) during pregnancy in the Sprague-Dawley rat	Conley JM, Lambright CS, Evans N, Medlock-Kakaley E, Dixon A, Hill D, McCord J, Strynar MJ, Ford J, Gray LE Jr.	Environment international	10.1016/j.envint.2022.107631
Current Breast Milk PFAS Levels in the United States and Canada: After All This Time, Why Don't We Know More?	LaKind JS, Verner MA, Rogers RD, Goeden H, Naiman DQ, Marchitti SA, Lehmann GM, Hines EP, Fenton SE.	Environmental health perspectives	10.1289/EHP10359
Current per- and polyfluoroalkyl substance (PFAS) research points to a growing threat in animals	Brake HD, Langfeldt A, Kaneene JB, Wilkins MJ.	Journal of the American Veterinary Medical Association	10.2460/javma.22.12.0582
Current Review of Increasing Animal Health Threat of Per- and Polyfluoroalkyl Substances (PFAS): Harms, Limitations, and Alternatives to Manage Their Toxicity	Peritore AF, Gugliandolo E, Cuzzocrea S, Crupi R, Britti D.	International journal of molecular sciences	10.3390/ijms241411707
Current state of knowledge of environmental occurrence, toxic effects, and advanced treatment of PFOS and PFOA	Antonopoulou M, Spyrou A, Tzamaria A, Efthimiou I, Triantafyllidis V.	The Science of the total environment	10.1016/j.scitotenv.2023.169332
Data derived extrapolation factors for developmental toxicity: A preliminary research case study with perfluorooctanoate (PFOA)	Dourson ML, Gadagbui B, Onyema C, McGinnis PM, York RG.	Regulatory toxicology and pharmacology : RTP	10.1016/j.yrtph.2019.104502
Data derived Extrapolation Factors for developmental toxicity: A preliminary research case study with perfluorooctanoate (PFOA)	Dourson ML, Gadagbui B, Onyema C, McGinnis PM, York RG.	Regulatory toxicology and pharmacology : RTP	10.1016/j.yrtph.2019.104446
Decoding PFAS contamination via Raman spectroscopy: A combined DFT and machine learning investigation	Chen Y, Yang Y, Cui J, Zhang H, Zhao Y.	Journal of hazardous materials	10.1016/j.jhazmat.2023.133260
Deep autoencoder-based behavioral pattern recognition outperforms standard statistical methods in high-dimensional zebrafish studies	Green AJ, Truong L, Thunga P, Leong C, Hancock M, Tanguay RL, Reif DM.		10.1101/2023.09.13.557544
Deficiency of spns1 exacerbates per- and polyfluoroalkyl substances mediated hepatic toxicity and steatosis in zebrafish (Danio rerio)	Gadi S, Niture S, Hoang H, Qi Q, Hatcher C, Huang X, Haider J, Norford DC, Leung T, Levine KE, Kumar D.	Toxicology	10.1016/j.tox.2023.153641
Defining embryonic developmental effects of chemical mixtures using the embryonic stem cell test	van Oostrom CT, Slob W, van der Ven LT.	Food and chemical toxicology : an international journal published for the British Industrial Biological Research Association	10.1016/j.fct.2020.111284
Degradation and mechanism of hexafluoropropylene oxide dimer acid by thermally activated persulfate in aqueous solutions	Ding X, Song X, Chen X, Ding D, Xu C, Chen H.	Chemosphere	10.1016/j.chemosphere.2021.131720
Degradation of per- and polyfluoroalkyl substances in landfill leachate by a thin-water-film nonthermal plasma reactor	Eeso K, Gallan R, Goukeh MN, Tate K, Raja RKB, Popovic Z, Abichou T, Chen H, Locke BR, Tang Y.	Waste management (New York, N.Y.)	10.1016/j.wasman.2023.02.030
Deleterious functional consequences of perfluoroalkyl substances accumulation into the myelin sheath	Butruille L, Jubin P, Martin E, Aigrot MS, Lhomme M, Fini JB, Demeneix B, Stankoff B, Lubetzki C, Zalc B, Remaud S.	Environment international	10.1016/j.envint.2023.108211
Delineation of a PFOA Plume and Assessment of Data Gaps in its Conceptual Model Using PlumeSeeker™	Ozbek M, Voorhies N, Howard L, Swanson R, Fox T.	Ground water	10.1111/gwat.13373
Demonstrating removal credits for contaminants of emerging concern in recycled water through a reverse osmosis barrier-A predictive framework	Pang H, Allinson M, Northcott K, Schultz A, Scales PJ.	Water research	10.1016/j.watres.2023.120427
Derivation of a Human In Vivo Benchmark Dose for Perfluorooctanoic Acid From ToxCast In Vitro Concentration-Response Data Using a Computational Workflow for Probabilistic Quantitative In Vitro to In Vivo Extrapolation	Loizou G, McNally K, Dorne JCM, Hogg A.	Frontiers in pharmacology	10.3389/fphar.2021.630457
Deriving aquatic PNECs of endocrine disruption effects for PFOS and PFOA by combining species sensitivity weighted distributions and adverse outcome pathway networks	Zhang J, Tao H, Shi J, Ge H, Li B, Wang Y, Zhang M, Li X.	Chemosphere	10.1016/j.chemosphere.2023.140583
Detection methods for sub-nanogram level of emerging pollutants - Per and polyfluoroalkyl substances	Ganesan S, Chawengkijwanich C, Gopalakrishnan M, Janjaroen D.	Food and chemical toxicology : an international journal published for the British Industrial Biological Research Association	10.1016/j.fct.2022.113377
Determination of 56 per- and polyfluoroalkyl substances in top predators and their prey from Northern Europe by LC-MS/MS	Androulakakis A, Alygizakis N, Gkotsis G, Nika MC, Nikolopoulou V, Bizani E, Chadwick E, Cincinelli A, Claßen D, Danielsson S, Dekker RWRJ, Duke G, Glowacka N, Jansman HAH, Krone O, Martellini T, Movalli P, Persson S, Roos A, O'Rourke E, Siebert U, Treu G, van den Brink NW, Walker LA, Deaville R, Slobodnik J, Thomaidis NS.	Chemosphere	10.1016/j.chemosphere.2021.131775
Determination of adsorbable organically bound fluorine (AOF) and adsorbable organically bound halogens as sum parameters in aqueous environmental samples using combustion ion chromatography (CIC)	von Abercron E, Falk S, Stahl T, Georgii S, Hamscher G, Brunn H, Schmitz F.	The Science of the total environment	10.1016/j.scitotenv.2019.04.068
Determination of contamination levels for multiple endocrine disruptors in hair from a non-occupationally exposed population living in Liege (Belgium)	Claessens J, Pirard C, Charlier C.	The Science of the total environment	10.1016/j.scitotenv.2021.152734
Determination of in vitro hepatotoxic potencies of a series of perfluoroalkyl substances (PFASs) based on gene expression changes in HepaRG liver cells	Louisse J, Fragki S, Rijkers D, Janssen A, van Dijk B, Leenders L, Staats M, Bokkers B, Zeilmaker M, Piersma A, Luijten M, Hoogenboom R, Peijnenburg A.	Archives of toxicology	10.1007/s00204-023-03450-2
Determination of Perflourooctanoic Acid Toxicity in a Human Hepatocarcinoma Cell Line	Abudayyak M, Öztaş E, Özhan G.	Journal of health & pollution	10.5696/2156-9614-11.31.210909
Determination of perfluorooctane sulphonate and perfluorooctanoic acid in seafood and water from Map Ta Phut Industrial Estate area, Thailand	Lertassavakorn T, Pholphana N, Rangkadilok N, Suriyo T, Satayavivad J.	Food additives & contaminants. Part A, Chemistry, analysis, control, exposure & risk assessment	10.1080/19440049.2021.1921281
Developing Hazard Rating Calculation Methodologies for Per- and Polyfluoroalkyl Substances	McDougall MRR, Kalinovich I.	Environmental toxicology and chemistry	10.1002/etc.4981
Developing potency factors for thyroid hormone disruption by PFASs using TTR-TRβ CALUX® bioassay and assessment of PFASs mixtures in technical products	Behnisch PA, Besselink H, Weber R, Willand W, Huang J, Brouwer A.	Environment international	10.1016/j.envint.2021.106791
Development and application of an interactive generic physiologically based pharmacokinetic (igPBPK) model for adult beef cattle and lactating dairy cows to estimate tissue distribution and edible tissue and milk withdrawal intervals for per- and polyfluoroalkyl substances (PFAS)	Chou WC, Tell LA, Baynes RE, Davis JL, Cheng YH, Maunsell FP, Riviere JE, Lin Z.	Food and chemical toxicology : an international journal published for the British Industrial Biological Research Association	10.1016/j.fct.2023.114062
Development and application of an LC-MS method to the determination of poly- and perfluoroalkyl substances (PFASs) in drinking, sea and surface water samples	Huerta B, McHugh B, Regan F.	Analytical methods : advancing methods and applications	10.1039/d2ay00300g
Development of a Completely New PFOS Alternative with Lower Surface Tension for Minimizing the Environmental Burden	Zhou Z, Guo R, Chen B, Wang L, Cao H, Wei C, Hu M, Zhan Y, Li S, Wang Y, Liang Y.	Chemical research in Chinese universities	10.1007/s40242-023-3030-4
Development of a Gestational and Lactational Physiologically Based Pharmacokinetic (PBPK) Model for Perfluorooctane Sulfonate (PFOS) in Rats and Humans and Its Implications in the Derivation of Health-Based Toxicity Values	Chou WC, Lin Z.	Environmental health perspectives	10.1289/EHP7671
Development of a PFAS reaction library: identifying plausible transformation pathways in environmental and biological systems	Weber EJ, Tebes-Stevens C, Washington JW, Gladstone R.	Environmental science. Processes & impacts	10.1039/d1em00445j
Development of a simplified human embryonic stem cell-based retinal pre-organoid model for toxicity evaluations of common pollutants	Wang Y, Yin N, Yang R, Zhao M, Li S, Zhang S, Zhao Y, Faiola F.	Cutaneous and ocular toxicology	10.1080/15569527.2023.2249988
Development of an environmental hazard-based rating assessment for defence-related chemical compounds in ecological soil systems	Persico F, Coulon F, Ladyman M, Temple T.	Environment international	10.1016/j.envint.2022.107392
Development of an oral reference dose for the perfluorinated compound GenX	Thompson CM, Fitch SE, Ring C, Rish W, Cullen JM, Haws LC.	Journal of applied toxicology : JAT	10.1002/jat.3812
Development of Per and Polyfluoroalkyl Substances Ecological Risk-Based Screening Levels	Zodrow JM, Frenchmeyer M, Dally K, Osborn E, Anderson P, Divine C.	Environmental toxicology and chemistry	10.1002/etc.4975
Development, Evaluation, and Application of Machine Learning Models for Accurate Prediction of Root Uptake of Per- and Polyfluoroalkyl Substances	Xiang L, Qiu J, Chen QQ, Yu PF, Liu BL, Zhao HM, Li YW, Feng NX, Cai QY, Mo CH, Li QX.		10.1021/acs.est.2c09788
Developmental effects of PFOS, PFOA and GenX in a 3D human induced pluripotent stem cell differentiation model	Davidsen N, Rosenmai AK, Lauschke K, Svingen T, Vinggaard AM.	Chemosphere	10.1016/j.chemosphere.2021.130624
Developmental exposure to a POPs mixture or PFOS increased body weight and reduced swimming ability but had no effect on reproduction or behavior in zebrafish adults	Christou M, Ropstad E, Brown S, Kamstra JH, Fraser TWK.	Aquatic toxicology (Amsterdam, Netherlands)	10.1016/j.aquatox.2021.105882
Developmental exposure to perfluorooctane sulfonate (PFOS) and perfluorooctanoic acid (PFOA) selectively decreases brain dopamine levels in Northern leopard frogs	Foguth RM, Flynn RW, de Perre C, Iacchetta M, Lee LS, Sepúlveda MS, Cannon JR.	Toxicology and applied pharmacology	10.1016/j.taap.2019.114623
Developmental exposures to perfluorooctanesulfonic acid (PFOS) impact embryonic nutrition, pancreatic morphology, and adiposity in the zebrafish, Danio rerio	Sant KE, Annunziato K, Conlin S, Teicher G, Chen P, Venezia O, Downes GB, Park Y, Timme-Laragy AR.	Environmental pollution (Barking, Essex : 1987)	10.1016/j.envpol.2021.116644
Developmental perfluorooctane sulfonate exposure inhibits long-term potentiation by affecting AMPA receptor trafficking	Zhang Q, Liu W, Zhao H, Zhang Z, Qin H, Luo F, Niu Q.	Toxicology	10.1016/j.tox.2018.11.015
Developmental Perfluorooctanesulfonic acid (PFOS) exposure as a potential risk factor for late-onset Alzheimer's disease in CD-1 mice and SH-SY5Y cells	Basaly V, Hill J, Bihaqi SW, Marques E, Slitt AL, Zawia NH.	Neurotoxicology	10.1016/j.neuro.2021.06.008
Developmental toxicity of Nafion byproduct 2 (NBP2) in the Sprague-Dawley rat with comparisons to hexafluoropropylene oxide-dimer acid (HFPO-DA or GenX) and perfluorooctane sulfonate (PFOS)	Conley JM, Lambright CS, Evans N, Medlock-Kakaley E, Hill D, McCord J, Strynar MJ, Wehmas LC, Hester S, MacMillan DK, Gray LE Jr.	Environment international	10.1016/j.envint.2021.107056
Developmental toxicity of the novel PFOS alternative OBS in developing zebrafish: An emphasis on cilia disruption	Huang J, Sun L, Mennigen JA, Liu Y, Liu S, Zhang M, Wang Q, Tu W.	Journal of hazardous materials	10.1016/j.jhazmat.2020.124491
Diet as an Exposure Source and Mediator of Per- and Polyfluoroalkyl Substance (PFAS) Toxicity	Roth K, Imran Z, Liu W, Petriello MC.	Frontiers in toxicology	10.3389/ftox.2020.601149
Dietary exposure and accumulation of per- and polyfluoroalkyl substances alters growth and reduces body condition of post-metamorphic salamanders	Flynn RW, Hoskins TD, Iacchetta M, de Perre C, Lee LS, Hoverman JT, Sepulveda MS.	The Science of the total environment	10.1016/j.scitotenv.2020.142730
Dietary Exposure of Japanese Quail (Coturnix japonica) to Perfluorooctane Sulfonate (PFOS) and a Legacy Aqueous Film-Forming Foam (AFFF) Containing PFOS: Effects on Reproduction and Chick Survivability and Growth	Bursian SJ, Link JE, McCarty M, Harr K, Roberts J, Simcik MF.	Environmental toxicology and chemistry	10.1002/etc.5138
Dietary exposure to per- and polyfluoroalkyl substances: Potential health impacts on human liver	Zhang J, Hu L, Xu H.	The Science of the total environment	10.1016/j.scitotenv.2023.167945
Dietary Habits Related to Food Packaging and Population Exposure to PFASs	Susmann HP, Schaider LA, Rodgers KM, Rudel RA.	Environmental health perspectives	10.1289/EHP4092
Dietary Perfluorohexanoic Acid (PFHxA) Exposures in Juvenile Zebrafish Produce Subtle Behavioral Effects across Generations	Rericha Y, Truong L, Leong C, Cao D, Field JA, Tanguay RL.	Toxics	10.3390/toxics10070372
Differences between reductive defluorination of perfluorooctanoic acid by chlorination, bromination, and iodization in the vacuum-ultraviolet/sulfite process	Hou C, Deng J, Li S, Li H, Zhou Y, Zhai Y.	Journal of hazardous materials	10.1016/j.jhazmat.2023.132459
Differences in Trophic Level, Contaminant Load, and DNA Damage in an Urban and a Remote Herring Gull (Larus argentatus) Breeding Colony in Coastal Norway	Keilen EK, Borgå K, Thorstensen HS, Hylland K, Helberg M, Warner N, Baek K, Reiertsen TK, Ruus A.	Environmental toxicology and chemistry	10.1002/etc.5441
Different Life-Stage Exposure to Hexafluoropropylene Oxide Trimer Acid Induces Reproductive Toxicity in Adult Zebrafish (Danio rerio)	Dong S, Xu J, Yang D, Zhao X, Li X, Chen D, Xing J, Shi Y, Sun Y, Ding G.	Environmental toxicology and chemistry	10.1002/etc.5732
Differential Developmental Neurotoxicity and Tissue Uptake of the Per- and Polyfluoroalkyl Substance Alternatives, GenX and PFBS	Wasel O, King H, Choi YJ, Lee LS, Freeman JL.	Environmental science & technology	10.1021/acs.est.3c05023
Differential susceptibility of rat primary neurons and neural stem cells to PFOS and PFOA toxicity	Pierozan P, Karlsson O.	Toxicology letters	10.1016/j.toxlet.2021.06.004
Differing behavioral changes in crayfish and bluegill under short- and long-chain PFAS exposures: Field study in Northern Michigan, USA	Coy CO, Steele AN, Abdulelah SA, Belanger RM, Crile KG, Stevenson LM, Moore PA.	Ecotoxicology and environmental safety	10.1016/j.ecoenv.2022.114212
Direct effects of organic pollutants on the growth and gene expression of the Baltic Sea model bacterium Rheinheimera sp. BAL341	Karlsson CMG, Cerro-Gálvez E, Lundin D, Karlsson C, Vila-Costa M, Pinhassi J.	Microbial biotechnology	10.1111/1751-7915.13441
Direct inhibition of human and rat 11β-hydroxysteroid dehydrogenase 2 by per- and polyfluoroalkyl substances: Structure-activity relationship and in silico docking analysis	Zhao C, Wang S, Zhai Y, Wang M, Tang Y, Li H, Im YJ, Ge RS.	Toxicology	10.1016/j.tox.2023.153484
Discussion. Has the human population become a sentinel for the adverse effects of PFAS contamination on wildlife health and endangered species?	Andrews DQ, Stoiber T, Temkin AM, Naidenko OV.	The Science of the total environment	10.1016/j.scitotenv.2023.165939
Disposition of Fluorine on New Firefighter Turnout Gear	Muensterman DJ, Titaley IA, Peaslee GF, Minc LD, Cahuas L, Rodowa AE, Horiuchi Y, Yamane S, Fouquet TNJ, Kissel JC, Carignan CC, Field JA.	Environmental science & technology	10.1021/acs.est.1c06322
Distinct transcriptional response of Caenorhabditis elegans to different exposure routes of perfluorooctane sulfonic acid	Stylianou M, Björnsdotter MK, Olsson PE, Ericson Jogsten I, Jass J.	Environmental research	10.1016/j.envres.2018.10.019
Distinguishing mode of action of compounds inducing craniofacial malformations in zebrafish embryos to support dose-response modeling in combined exposures	Heusinkveld HJ, Schoonen WG, Hodemaekers HM, Nugraha A, Sirks JJ, Veenma V, Sujan C, Pennings JLA, Wackers PF, Palazzolo L, Eberini I, Rorije E, van der Ven LTM.	Reproductive toxicology (Elmsford, N.Y.)	10.1016/j.reprotox.2020.06.002
Distribution of eight perfluoroalkyl acids in plant-soil-water systems and their effect on the soil microbial community	Zhang D, Zhang W, Liang Y.	The Science of the total environment	10.1016/j.scitotenv.2019.134146
Distribution of perfluoroalkyl substances (PFASs) in aquatic plant-based systems: From soil adsorption and plant uptake to effects on microbial community	Zhang DQ, Wang M, He Q, Niu X, Liang Y.	Environmental pollution (Barking, Essex : 1987)	10.1016/j.envpol.2019.113575
Distribution of perfluoroalkyl substances (PFASs) in water, sediment, and fish tissue, and the potential human health risks due to fish consumption in Lake Hawassa, Ethiopia	Melake BA, Bervoets L, Nkuba B, Groffen T.	Environmental research	10.1016/j.envres.2021.112033
Distribution of perfluorooctane sulfonate in mice and its effect on liver lipidomic	Li X, Li T, Wang Z, Wei J, Liu J, Zhang Y, Zhao Z.	Talanta	10.1016/j.talanta.2021.122150
Distribution of select per- and polyfluoroalkyl substances at a chemical manufacturing plant	Schumacher BA, Zimmerman JH, Williams AC, Lutes CC, Holton CW, Escobar E, Hayes H, Warrier R.	Journal of hazardous materials	10.1016/j.jhazmat.2023.133025
Disturbance in transcriptomic profile, proliferation and multipotency in human mesenchymal stem cells caused by hexafluoropropylene oxides	Pan Y, Qin H, Zheng L, Guo Y, Liu W.	Environmental pollution (Barking, Essex : 1987)	10.1016/j.envpol.2021.118483
Do PFAS changes in landfill leachate treatment systems correlate with changes in physical chemical parameters?	Zhang H, Chen Y, Liu Y, Bowden JA, Townsend TG, Solo-Gabriele HM.	Waste management (New York, N.Y.)	10.1016/j.wasman.2022.07.030
Does Low Maternal Exposure to Per- and Polyfluoroalkyl Substances Elevate the Risk of Spontaneous Preterm Birth? A Nested Case-Control Study in China	Liu X, Chen D, Wang B, Xu F, Pang Y, Zhang L, Zhang Y, Jin L, Li Z, Ren A.	Environmental science & technology	10.1021/acs.est.0c01930
Does persistent organic pollutant PFOS (perfluorooctane sulfonate) negative impacts on the aquatic invertebrate organism, Astacus leptodactylus [Eschscholtz, 1823]	Belek N, Erkmen B, Dinçel AS, Gunal AC.	Ecotoxicology (London, England)	10.1007/s10646-022-02579-7
Dose addition in chemical mixtures inducing craniofacial malformations in zebrafish (Danio rerio) embryos	Zoupa M, Zwart EP, Gremmer ER, Nugraha A, Compeer S, Slob W, van der Ven LTM.	Food and chemical toxicology : an international journal published for the British Industrial Biological Research Association	10.1016/j.fct.2020.111117
Dose Addition Models Accurately Predict the Subacute Effects of a Mixture of Perfluorooctane Sulfonate and Perfluorooctanoic Acid on Japanese Quail (Coturnix japonica) Chick Mortality	Gray LE, Conley JM, Bursian SJ.	Environmental toxicology and chemistry	10.1002/etc.5758
Dose additive maternal and offspring effects of oral maternal exposure to a mixture of three PFAS (HFPO-DA, NBP2, PFOS) during pregnancy in the Sprague-Dawley rat	Conley JM, Lambright CS, Evans N, Farraj AK, Smoot J, Grindstaff RD, Hill D, McCord J, Medlock-Kakaley E, Dixon A, Hines E, Gray LE Jr.	The Science of the total environment	10.1016/j.scitotenv.2023.164609
Dose Effects of Ammonium Perfluorooctanoate on Lipoprotein Metabolism in APOE*3-Leiden.CETP Mice	Pouwer MG, Pieterman EJ, Chang SC, Olsen GW, Caspers MPM, Verschuren L, Jukema JW, Princen HMG.	Toxicological sciences : an official journal of the Society of Toxicology	10.1093/toxsci/kfz015
Dose Response, Dosimetric, and Metabolic Evaluations of Replacement PFAS Perfluoro-(2,5,8-trimethyl-3,6,9-trioxadodecanoic) Acid (HFPO-TeA)	Renyer A, Ravindra K, Wetmore BA, Ford JL, DeVito M, Hughes MF, Wehmas LC, MacMillan DK.	Toxics	10.3390/toxics11120951
Dynamic growth metrics for examining prenatal exposure impacts on child growth trajectories: Application to perfluorooctanoic acid (PFOA) and postnatal weight gain	Tanner EM, Bornehag CG, Gennings C.	Environmental research	10.1016/j.envres.2019.109044
Dynamics, thermodynamics, and mechanism of perfluorooctane sulfonate (PFOS) sorption to various soil particle-size fractions of paddy soil	Chen XT, Yu PF, Xiang L, Zhao HM, Li YW, Li H, Zhang XY, Cai QY, Mo CH, Wong MH.	Ecotoxicology and environmental safety	10.1016/j.ecoenv.2020.111105
Dysregulated lipid and fatty acid metabolism link perfluoroalkyl substances exposure and impaired glucose metabolism in young adults	Chen Z, Yang T, Walker DI, Thomas DC, Qiu C, Chatzi L, Alderete TL, Kim JS, Conti DV, Breton CV, Liang D, Hauser ER, Jones DP, Gilliland FD.	Environment international	10.1016/j.envint.2020.106091
Early life exposure to low-dose perfluorooctane sulfonate disturbs gut barrier homeostasis and increases the risk of intestinal inflammation in offspring	Liu Y, Yu G, Zhang R, Feng L, Zhang J.	Environmental pollution (Barking, Essex : 1987)	10.1016/j.envpol.2023.121708
Early life exposure to per- and polyfluoroalkyl substances (PFAS) and latent health outcomes: A review including the placenta as a target tissue and possible driver of peri- and postnatal effects	Blake BE, Fenton SE.	Toxicology	10.1016/j.tox.2020.152565
Early life exposure to perfluorooctanesulfonate (PFOS) impacts vital biological processes in Xenopus laevis: Integrated morphometric and transcriptomic analyses	Ismail T, Lee HK, Lee H, Kim Y, Kim E, Lee JY, Kim KB, Ryu HY, Cho DH, Kwon TK, Park TJ, Kwon T, Lee HS.	Ecotoxicology and environmental safety	10.1016/j.ecoenv.2023.115820
Early pregnancy loss: Do Per- and polyfluoroalkyl substances matter?	Wang B, Fu J, Gao K, Liu Q, Zhuang L, Zhang G, Long M, Na J, Ren M, Wang A, Liang R, Shen G, Li Z, Lu Q.	Environment international	10.1016/j.envint.2021.106837
Early prenatal exposure to suspected endocrine disruptor mixtures is associated with lower IQ at age seven	Tanner EM, Hallerbäck MU, Wikström S, Lindh C, Kiviranta H, Gennings C, Bornehag CG.	Environment international	10.1016/j.envint.2019.105185
Early Warnings by Liver Organoids on Short- and Long-Chain PFAS Toxicity	Palazzolo S, Caligiuri I, Sfriso AA, Mauceri M, Rotondo R, Campagnol D, Canzonieri V, Rizzolio F.	Toxics	10.3390/toxics10020091
Early-life associations between per- and polyfluoroalkyl substances and serum lipids in a longitudinal birth cohort	Blomberg AJ, Shih YH, Messerlian C, Jørgensen LH, Weihe P, Grandjean P.	Environmental research	10.1016/j.envres.2021.111400
Early-life exposure to perfluorinated alkyl substances modulates lipid metabolism in progression to celiac disease	Sinisalu L, Sen P, Salihović S, Virtanen SM, Hyöty H, Ilonen J, Toppari J, Veijola R, Orešič M, Knip M, Hyötyläinen T.	Environmental research	10.1016/j.envres.2020.109864
Early-life exposure to perfluoroalkyl substances in relation to serum adipokines in a longitudinal birth cohort	Shih YH, Blomberg AJ, Jørgensen LH, Weihe P, Grandjean P.	Environmental research	10.1016/j.envres.2021.111905
Early-life perfluorooctanoic acid (PFOA) and perfluorooctane sulfonic acid (PFOS) exposure cause obesity by disrupting fatty acids metabolism and enhancing triglyceride synthesis in Caenorhabditis elegans	Lin TA, Huang CW, Wei CC.	Aquatic toxicology (Amsterdam, Netherlands)	10.1016/j.aquatox.2022.106274
Early-life perfluorooctanoic acid exposure induces obesity in male offspring and the intervention role of chlorogenic acid	Shao W, Xu J, Xu C, Weng Z, Liu Q, Zhang X, Liang J, Li W, Zhang Y, Jiang Z, Gu A.	Environmental pollution (Barking, Essex : 1987)	10.1016/j.envpol.2020.115974
Ecological and health risk assessment of perfluorooctane sulfonate in surface and drinking water resources in China	Gao X, Liu Z, Li J, Wang X, Cui L, Ai S, Zhao S, Xu Q.	The Science of the total environment	10.1016/j.scitotenv.2020.139914
Ecological and spatial variations of legacy and emerging contaminants in white-tailed sea eagles from Germany: Implications for prioritisation and future risk management	Badry A, Treu G, Gkotsis G, Nika MC, Alygizakis N, Thomaidis NS, Voigt CC, Krone O.	Environment international	10.1016/j.envint.2021.106934
Ecological characteristics impact PFAS concentrations in a U.S. North Atlantic food web	Hedgespeth ML, Taylor DL, Balint S, Schwartz M, Cantwell MG.	The Science of the total environment	10.1016/j.scitotenv.2023.163302
Ecological risk assessment for perfluorohexanesulfonic acid (PFHxS) in soil using species sensitivity distribution (SSD) approach	Liu Y, Bahar MM, Samarasinghe SVAC, Qi F, Carles S, Richmond WR, Dong Z, Naidu R.	Journal of hazardous materials	10.1016/j.jhazmat.2022.129667
Ecological risk assessment for perfluorooctanoic acid in soil using a species sensitivity approach	Kwak JI, Lee TY, Seo H, Kim D, Kim D, Cui R, An YJ.	Journal of hazardous materials	10.1016/j.jhazmat.2019.121150
Ecological risk assessment of 50 emerging contaminants in surface water of the Greater Bay Area, China	Wang Z, Li Z, Lou Q, Pan J, Wang J, Men S, Yan Z.	The Science of the total environment	10.1016/j.scitotenv.2023.168105
Ecological risk assessment of per- and polyfluorinated alkyl substances: Foreword	Henning MH, Fuchsman PC.	Integrated environmental assessment and management	10.1002/ieam.4465
Ecotoxicity and Accumulation of Perfluorononanoic Acid in the Fathead Minnow (Pimephales promelas) and an Approach to Developing Protective Thresholds in the Aquatic Environment Through Species Sensitivity Distribution	Suski JG, Chanov MK, Heron CG, Field JA, Salice CJ.	Environmental toxicology and chemistry	10.1002/etc.5692
Ecotoxicity of single and mixture of perfluoroalkyl substances (PFOS and PFOA) in soils to the earthworm Aporrectodea caliginosa	Delor L, Louzon M, Pelosi C, Michel E, Maillet G, Carronnier H.	Environmental pollution (Barking, Essex : 1987)	10.1016/j.envpol.2023.122221
Ecotoxicological effects of microplastics on aquatic organisms: a review	Vo HC, Pham MH.	Environmental science and pollution research international	10.1007/s11356-021-14982-4
Ecotoxicological effects of per- and polyfluoroalkyl substances (PFAS) and of a new PFAS adsorbing organoclay to immobilize PFAS in soils on earthworms and plants	Melo TM, Schauerte M, Bluhm A, Slaný M, Paller M, Bolan N, Bosch J, Fritzsche A, Rinklebe J.	Journal of hazardous materials	10.1016/j.jhazmat.2022.128771
Editorial: Is it time to stick it to PFAS?	Ulker OC, Banerjee P.	Frontiers in toxicology	10.3389/ftox.2023.1240563
Effect of endosulfan and bisphenol A on the expression of SUMO and UBC9	Yarahalli Jayaram V, Baggavalli S, Reddy D, Sistla S, Malempati R.	Drug and chemical toxicology	10.1080/01480545.2018.1526179
Effect of perfluorooctanesulfonate exposure on steroid hormone levels and steroidogenic enzyme activities in juvenile Silurana tropicalis	Fort DJ, Mathis MB, Fort CE, Fort HM, Fort TD, Guiney PD, Weeks JA.	Journal of applied toxicology : JAT	10.1002/jat.3794
Effect of perfluorooctanesulfonic acid (PFOS) on the liver lipid metabolism of the developing chicken embryo	Geng D, Musse AA, Wigh V, Carlsson C, Engwall M, Orešič M, Scherbak N, Hyötyläinen T.	Ecotoxicology and environmental safety	10.1016/j.ecoenv.2018.12.040
Effect of perfluorooctanoic acid on microbial activity in wheat soil under different fertilization conditions	Chen H, Wang Q, Cai Y, Yuan R, Wang F, Zhou B, Chen Z.	Environmental pollution (Barking, Essex : 1987)	10.1016/j.envpol.2020.114784
Effect of Perfluorooctanoic Acid on the Epigenetic and Tight Junction Genes of the Mouse Intestine	Rashid F, Ahmad S, Irudayaraj JMK.	Toxics	10.3390/toxics8030064
Effect of pH, surface charge and soil properties on the solid-solution partitioning of perfluoroalkyl substances (PFASs) in a wide range of temperate soils	Campos-Pereira H, Kleja DB, Ahrens L, Enell A, Kikuchi J, Pettersson M, Gustafsson JP.	Chemosphere	10.1016/j.chemosphere.2023.138133
Effect of prenatal exposure to per- and polyfluoroalkyl substances on childhood allergies and common infectious diseases in children up to age 7 years: The Hokkaido study on environment and children's health	Ait Bamai Y, Goudarzi H, Araki A, Okada E, Kashino I, Miyashita C, Kishi R.	Environment international	10.1016/j.envint.2020.105979
Effect of prenatal PFOS exposure on liver cell function in neonatal mice	Liang X, Xie G, Wu X, Su M, Yang B.	Environmental science and pollution research international	10.1007/s11356-019-05245-4
Effect of pretreatment with a synbiotic on Perfluorooctanoic acid-induced liver damage after sub-acute oral exposure in C57BL/6J mice	Soltani M, Pourfarzam M, Sharifabad AH, Neisiani AK, Mousavi MK, Aliomrani M.	Toxicology and applied pharmacology	10.1016/j.taap.2022.116360
Effect of solution chemistry on the transport of short-chain and long-chain perfluoroalkyl carboxylic acids (PFCAs) in saturated porous media	Qi L, Li R, Wu Y, Lin X, Chen G.	Chemosphere	10.1016/j.chemosphere.2022.135160
Effect-Directed Analysis Based on Transthyretin Binding Activity of Per- and Polyfluoroalkyl Substances in a Contaminated Sediment Extract	Langberg HA, Choyke S, Hale SE, Koekkoek J, Cenijn PH, Lamoree MH, Rundberget T, Jartun M, Breedveld GD, Jenssen BM, Higgins CP, Hamers T.	Environmental toxicology and chemistry	10.1002/etc.5777
Effective coordination, collaboration, communication, and partnering are needed to close the gaps for occupational PFAS exposure	Moore SM, Brown C, Kiederer M, Calkins MM, Burgess JL, D'Alessandro M, Davis R, Fenton SE, Morrison P, Reh CM.	American journal of industrial medicine	10.1002/ajim.23348
Effective PFAS degradation by electrochemical oxidation methods-recent progress and requirement	Mirabediny M, Sun J, Yu TT, Åkermark B, Das B, Kumar N.	Chemosphere	10.1016/j.chemosphere.2023.138109
Effects of an environmentally relevant PFAS mixture on dopamine and steroid hormone levels in exposed mice	Grønnestad R, Johanson SM, Müller MHB, Schlenk D, Tanabe P, Krøkje Å, Jaspers VLB, Jenssen BM, Ræder EM, Lyche JL, Shi Q, Arukwe A.	Toxicology and applied pharmacology	10.1016/j.taap.2021.115670
Effects of biofouling on the uptake of perfluorinated alkyl acids by organic-diffusive gradients in thin films passive samplers	Wang P, Challis JK, He ZX, Wong CS, Zeng EY.	Environmental science. Processes & impacts	10.1039/d1em00436k
Effects of chlorinated polyfluoroalkyl ether sulfonate in comparison with perfluoroalkyl acids on gene profiles and stemness in human mesenchymal stem cells	Pan Y, Qin H, Liu W, Zhang Q, Zheng L, Zhou C, Quan X.	Chemosphere	10.1016/j.chemosphere.2019.124402
Effects of combined exposure of PVC and PFOA on the physiology and biochemistry of Microcystis aeruginosa	Zhang W, Liu J, Li Q, Xiao Y, Zhang Y, Lei N, Wang Q.	Chemosphere	10.1016/j.chemosphere.2023.139476
Effects of co-occurrence of PFASs and chlorinated aliphatic hydrocarbons on microbial communities in groundwater: A field study	Tang Z, Song X, Xu M, Yao J, Ali M, Wang Q, Zeng J, Ding X, Wang C, Zhang Z, Liu X.	Journal of hazardous materials	10.1016/j.jhazmat.2022.128969
Effects of endocrine disrupting chemicals on the expression of RACK1 and LPS-induced THP-1 cell activation	Masi M, Maddalon A, Iulini M, Linciano P, Galbiati V, Marinovich M, Racchi M, Corsini E, Buoso E.	Toxicology	10.1016/j.tox.2022.153321
Effects of exposure to per- and polyfluoroalkyl substances on vaccine antibodies: A systematic review and meta-analysis based on epidemiological studies	Zhang X, Xue L, Deji Z, Wang X, Liu P, Lu J, Zhou R, Huang Z.	Environmental pollution (Barking, Essex : 1987)	10.1016/j.envpol.2022.119442
Effects of gestational exposure to perfluorooctane sulfonate on the lung development of offspring rats	Zhang H, Lu H, Yu L, Yuan J, Qin S, Li C, Ge RS, Chen H, Ye L.	Environmental pollution (Barking, Essex : 1987)	10.1016/j.envpol.2020.115535
Effects of gestational low dose perfluorooctanoic acid on maternal and "anxiety-like" behavior in dams	Merrill AK, Conrad K, Marvin E, Sobolewski M.	Frontiers in toxicology	10.3389/ftox.2022.971970
Effects of In Utero Exposure to Perfluorooctane Sulfonate on Placental Functions	Wan HT, Wong AY, Feng S, Wong CK.	Environmental science & technology	10.1021/acs.est.0c06569
Effects of in vitro exposure of perfluorooctanoic acid and monocrotophos on astroglia SVG p12 cells	Osemwegie O, Butler L, Subbiah S, Smith E.	Journal of applied toxicology : JAT	10.1002/jat.4129
Effects of long-term perfluorooctane sulfonate (PFOS) exposure on activated sludge performance, composition, and its microbial community	Lu B, Qian J, He F, Wang P, He Y, Tang S, Tian X.	Environmental pollution (Barking, Essex : 1987)	10.1016/j.envpol.2021.118684
Effects of maternal exposure to PFOA on testes of male offspring mice	Bao J, Zhang Y, Zhang L, Wang X.	Chemosphere	10.1016/j.chemosphere.2021.129585
Effects of per- and poly-fluorinated alkyl substances on pancreatic and endocrine differentiation of human pluripotent stem cells	Liu S, Yang R, Yin N, Faiola F.	Chemosphere	10.1016/j.chemosphere.2020.126709
Effects of Per- and Polyfluoroalkyl Substance Mixtures on the Susceptibility of Larval American Bullfrogs to Parasites	Lech ME, Choi YJ, Lee LS, Sepúlveda MS, Hoverman JT.	Environmental science & technology	10.1021/acs.est.2c04574
Effects of Perfluoralkyl Substances on a Multigenerational Scale: A Case Study with Chironomus riparius (Diptera, Chironomidae)	Marziali L, Rosignoli F, Valsecchi S, Polesello S, Stefani F.	Environmental toxicology and chemistry	10.1002/etc.4392
Effects of perfluoroalkyl substances (PFASs) and benzo[a]pyrene (BaP) co-exposure on phase I biotransformation in rainbow trout (Oncorhynchus mykiss)	Solan ME, Franco ME, Lavado R.	Fish physiology and biochemistry	10.1007/s10695-022-01093-1
Effects of perfluoroalkyl substances on root and rhizosphere bacteria: Phytotoxicity, phyto-microbial remediation, risk assessment	Liu H, Hu W, Li X, Hu F, Liu Y, Xie T, Liu B, Xi Y, Su Z, Zhang C.	Chemosphere	10.1016/j.chemosphere.2021.133137
Effects of perfluoroalkyl substances on soil respiration and enzymatic activity: differences in carbon chain-length dependence	Lv M, Xie Y, Yu H, Sun T, Song L, Wang F.	Journal of environmental science and health. Part. B, Pesticides, food contaminants, and agricultural wastes	10.1080/03601234.2022.2047563
Effects of perfluoroalkyl substances on the operational efficiency, microbial communities, and key metabolic pathways of constructed rapid infiltration system with coke as filler layer	Li X, Huang X, Fan S, Su C, Ding F, Wen S, Li D, Chen M.	Bioresource technology	10.1016/j.biortech.2023.128998
Effects of perfluorobutane sulfonate and perfluorooctane sulfonate on lipid homeostasis in mouse liver	Chen L, Liu Y, Mu H, Li H, Liu S, Zhu M, Bu Y, Wu B.	Environmental pollution (Barking, Essex : 1987)	10.1016/j.envpol.2022.120403
Effects of perfluorooctanoic acid (PFOA) on activated sludge microbial community under aerobic and anaerobic conditions	Huang D, Xu R, Sun X, Li Y, Xiao E, Xu Z, Wang Q, Gao P, Yang Z, Lin H, Sun W.	Environmental science and pollution research international	10.1007/s11356-022-18841-8
Effects of perfluorooctanoic acid (PFOA) on gene expression profiles via nuclear receptors in HepaRG cells: Comparative study with in vitro transactivation assays	Murase W, Kubota A, Ikeda-Araki A, Terasaki M, Nakagawa K, Shizu R, Yoshinari K, Kojima H.	Toxicology	10.1016/j.tox.2023.153577
Effects of perfluorooctanoic acid (PFOA) on the thyroid status, vitellogenin, and oxidant-antioxidant balance in the Murray River rainbowfish	Miranda AF, Trestrail C, Lekamge S, Nugegoda D.	Ecotoxicology (London, England)	10.1007/s10646-020-02161-z
Effects of perfluorooctanoic acid and perfluorooctane sulfonic acid on microbial community structure during anaerobic digestion	Choi G, Kan E.	Bioresource technology	10.1016/j.biortech.2023.129999
Effects of perfluorooctanoic acid on endoplasmic reticulum stress and lipid metabolism-related genes in human pancreatic cells	Abudayyak M, Karaman EF, Guler ZR, Ozden S.	Environmental toxicology and pharmacology	10.1016/j.etap.2023.104083
Effects of perfluorooctanoic acid on Microcystis aeruginosa: Stress and self-adaptation mechanisms	Hu J, Wang D, Zhang N, Tang K, Bai Y, Tian Y, Li Y, Zhang X.	Journal of hazardous materials	10.1016/j.jhazmat.2022.130396
Effects of perfluorooctanoic acid on stem Leydig cell functions in the rat	Lu H, Zhang H, Gao J, Li Z, Bao S, Chen X, Wang Y, Ge R, Ye L.	Environmental pollution (Barking, Essex : 1987)	10.1016/j.envpol.2019.03.120
Effects of PFOS, F-53B and OBS on locomotor behaviour, the dopaminergic system and mitochondrial function in developing zebrafish (Danio rerio)	Kalyn M, Lee H, Curry J, Tu W, Ekker M, Mennigen JA.	Environmental pollution (Barking, Essex : 1987)	10.1016/j.envpol.2023.121479
Effects of physicochemical properties and co-existing zinc agrochemicals on the uptake and phytotoxicity of PFOA and GenX in lettuce	Wang X, Zhang W, Lamichhane S, Dou F, Ma X.	Environmental science and pollution research international	10.1007/s11356-023-25435-5
Effects of short-chain per- and polyfluoroalkyl substances (PFAS) on human cytochrome P450 (CYP450) enzymes and human hepatocytes: An in vitro study	Solan ME, Lavado R.	Current research in toxicology	10.1016/j.crtox.2023.100116
Effects of short-chain per- and polyfluoroalkyl substances (PFAS) on toxicologically relevant gene expression profiles in a liver-on-a-chip model	Solan ME, Schackmuth B, Bruce ED, Pradhan S, Sayes CM, Lavado R.	Environmental pollution (Barking, Essex : 1987)	10.1016/j.envpol.2023.122610
Effects of single and combined exposure to BDE-47 and PFOA on distribution, bioaccumulation, and toxicity in blue mussel (Mytilus galloprovincialis)	Geng Q, Guo M, Wu H, Peng J, Zheng G, Liu X, Zhai Y, Tan Z.	Ecotoxicology and environmental safety	10.1016/j.ecoenv.2021.113014
Effects of subchronic exposure of perfluorooctane sulfonate on cognitive function of mice and its mechanism	Zhang H, Zhang C, Xu D, Wang Q, Xu D.	Environmental pollution (Barking, Essex : 1987)	10.1016/j.envpol.2023.121650
Efficient degradation of perfluorooctanoic acid by electrospun lignin-based bimetallic MOFs nanofibers composite membranes with peroxymonosulfate under solar light irradiation	Hou C, Chen W, Fu L, Zhang S, Liang C, Wang Y.	International journal of biological macromolecules	10.1016/j.ijbiomac.2021.01.184
Efficient photodegradation of PFOA using spherical BiOBr modified TiO(2) via hole-remained oxidation mechanism	Chen F, He A, Wang Y, Yu W, Chen H, Geng F, Li Z, Zhou Z, Liang Y, Fu J, Zhao L, Wang Y.	Chemosphere	10.1016/j.chemosphere.2022.134176
Efficient removal of PFOA with an In(2)O(3)/persulfate system under solar light via the combined process of surface radicals and photogenerated holes	Yuan Y, Feng L, He X, Liu X, Xie N, Ai Z, Zhang L, Gong J.	Journal of hazardous materials	10.1016/j.jhazmat.2021.127176
Efflux transport proteins of Tetrahymena thermophila play important roles in resistance to perfluorooctane sulfonate exposure	Wang M, Song B, Song T, Sun K, He J, Deng J, Fang L, Luan T, Lin L.	Journal of hazardous materials	10.1016/j.jhazmat.2023.132287
Electrocatalytic degradation of perfluoroocatane sulfonate (PFOS) on a 3D graphene-lead dioxide (3DG-PbO(2)) composite anode: Electrode characterization, degradation mechanism and toxicity	Duan X, Wang W, Wang Q, Sui X, Li N, Chang L.	Chemosphere	10.1016/j.chemosphere.2020.127587
Electrochemical adsorption of perfluorooctanoic acid on a novel reduced graphene oxide aerogel loaded with Cu nanoparticles and fluorine	Liu L, Liu Y, Che N, Gao B, Li C.	Journal of hazardous materials	10.1016/j.jhazmat.2021.125866
Electrochemical Advanced Oxidation of Perfluorooctanoic Acid: Mechanisms and Process Optimization with Kinetic Modeling	Chen Z, Wang X, Feng H, Chen S, Niu J, Di G, Kujawski D, Crittenden JC.	Environmental science & technology	10.1021/acs.est.2c02906
Electrochemical destruction and mobilization of perfluorooctanoic acid (PFOA) and perfluorooctane sulfonate (PFOS) in saturated soil	Hou J, Li G, Liu M, Chen L, Yao Y, Fallgren PH, Jin S.	Chemosphere	10.1016/j.chemosphere.2021.132205
Electrochemical Oxidation for Treatment of PFAS in Contaminated Water and Fractionated Foam-A Pilot-Scale Study	Smith SJ, Lauria M, Ahrens L, McCleaf P, Hollman P, Bjälkefur Seroka S, Hamers T, Arp HPH, Wiberg K.	ACS ES&T water	10.1021/acsestwater.2c00660
Electrochemical-based approaches for the treatment of forever chemicals: Removal of perfluoroalkyl and polyfluoroalkyl substances (PFAS) from wastewater	Sivagami K, Sharma P, Karim AV, Mohanakrishna G, Karthika S, Divyapriya G, Saravanathamizhan R, Kumar AN.	The Science of the total environment	10.1016/j.scitotenv.2022.160440
Electrooxidation of per- and polyfluoroalkyl substances in chloride-containing water on surface-fluorinated Ti(4)O(7) anodes: Mitigation and elimination of chlorate and perchlorate formation	Wang Y, Li L, Huang Q.	Chemosphere	10.1016/j.chemosphere.2022.135877
Elevated levels of per- and polyfluoroalkyl substances in Cape Fear River Striped Bass (Morone saxatilis) are associated with biomarkers of altered immune and liver function	Guillette TC, McCord J, Guillette M, Polera ME, Rachels KT, Morgeson C, Kotlarz N, Knappe DRU, Reading BJ, Strynar M, Belcher SM.	Environment international	10.1016/j.envint.2019.105358
Elevated Levels of Ultrashort- and Short-Chain Perfluoroalkyl Acids in US Homes and People	Zheng G, Eick SM, Salamova A.	Environmental science & technology	10.1021/acs.est.2c06715
Elucidating Key Characteristics of PFAS Binding to Human Peroxisome Proliferator-Activated Receptor Alpha: An Explainable Machine Learning Approach	Maeda K, Hirano M, Hayashi T, Iida M, Kurata H, Ishibashi H.	Environmental science & technology	10.1021/acs.est.3c06561
Elucidating the fate of perfluorooctanoate sulfonate using a rainbow trout (Oncorhynchus mykiss) physiologically-based toxicokinetic model	Vidal A, Babut M, Garric J, Beaudouin R.	The Science of the total environment	10.1016/j.scitotenv.2019.07.105
Elucidating the molecular mechanisms of perfluorooctanoic acid-serum protein interactions by structural mass spectrometry	Zhang W, Liu Z, Zhou Y, Lai C, Sun B, He M, Zhai Z, Wang J, Wang Q, Wang X, Wang F, Pan Y.	Chemosphere	10.1016/j.chemosphere.2021.132945
Embryonic ethanol exposure on zebrafish early development	Pinheiro-da-Silva J, Luchiari AC.	Brain and behavior	10.1002/brb3.2062
Embryonic exposure to PFAS causes long-term, compound-specific behavioral alterations in zebrafish	Hawkey AB, Mead M, Natarajan S, Gondal A, Jarrett O, Levin ED.	Neurotoxicology and teratology	10.1016/j.ntt.2023.107165
Emerging and Historical Contaminants Detected in Desert Rodents Collected Near a Low-Level Radioactive Waste Site	Cleary RS, Karnjanapiboonwong A, Thompson WA, Lasee SJ, Subbiah S, Kauble RK, Andraski BJ, Anderson TA.	Environmental toxicology and chemistry	10.1002/etc.4715
Emerging and legacy per- and polyfluoroalkyl substances in house dust from South China: Contamination status and human exposure assessment	Xu F, Chen D, Liu X, Guan Q, Tan H, Zhou D, Shi Y, Liu J, Hu Y.	Environmental research	10.1016/j.envres.2020.110243
Emerging Chlorinated Polyfluorinated Polyether Compounds Impacting the Waters of Southwestern New Jersey Identified by Use of Nontargeted Analysis	McCord JP, Strynar MJ, Washington JW, Bergman EL, Goodrow SM.	Environmental science & technology letters	10.1021/acs.estlett.0c00640
Emerging Contaminants: Fluorinated Alternatives to Existing PFAS	Ruan T, Field J, Cousins I, Lohmann R, Jiang G.	Environmental science & technology	10.1021/acs.est.2c03041
Emerging organic contaminants in the River Ganga and key tributaries in the middle Gangetic Plain, India: Characterization, distribution & controls	Richards LA, Guo S, Lapworth DJ, White D, Civil W, Wilson GJL, Lu C, Kumar A, Ghosh A, Khamis K, Krause S, Polya DA, Gooddy DC.	Environmental pollution (Barking, Essex : 1987)	10.1016/j.envpol.2023.121626
Emerging perfluoroalkyl substance impacts soil microbial community and ammonia oxidation	Ke Y, Chen J, Hu X, Tong T, Huang J, Xie S.	Environmental pollution (Barking, Essex : 1987)	10.1016/j.envpol.2019.113615
Emerging polyfluorinated compound Nafion by-product 2 disturbs intestinal homeostasis in zebrafish (Danio rerio)	Gui W, Guo H, Chen X, Wang J, Guo Y, Zhang H, Zhou X, Zhao Y, Dai J.	Ecotoxicology and environmental safety	10.1016/j.ecoenv.2022.114368
Emissions, Isomer-Specific Environmental Behavior, and Transformation of OBS from One Major Fluorochemical Manufacturing Facility in China	Hou M, Jin Q, Na G, Cai Y, Shi Y.	Environmental science & technology	10.1021/acs.est.2c01287
Endocrine disrupting chemicals and breast cancer: a systematic review of epidemiological studies	Wan MLY, Co VA, El-Nezami H.	Critical reviews in food science and nutrition	10.1080/10408398.2021.1903382
Endocrine disrupting chemicals: Impacts on human fertility and fecundity during the peri-conception period	Green MP, Harvey AJ, Finger BJ, Tarulli GA.	Environmental research	10.1016/j.envres.2020.110694
Endocrine Disruptor Potential of Short- and Long-Chain Perfluoroalkyl Substances (PFASs)-A Synthesis of Current Knowledge with Proposal of Molecular Mechanism	Mokra K.	International journal of molecular sciences	10.3390/ijms22042148
Endocrine Disruptors and Thyroid Health	Pearce EN.	Endocrine practice : official journal of the American College of Endocrinology and the American Association of Clinical Endocrinologists	10.1016/j.eprac.2023.11.002
Endocrine-Disrupting Chemicals and Breast Cancer: Disparities in Exposure and Importance of Research Inclusivity	Santaliz Casiano A, Lee A, Teteh D, Madak Erdogan Z, Treviño L.	Endocrinology	10.1210/endocr/bqac034
Endocrine-disrupting chemicals and male reproductive health	Mínguez-Alarcón L, Gaskins AJ, Meeker JD, Braun JM, Chavarro JE.	Fertility and sterility	10.1016/j.fertnstert.2023.10.008
Endocrine-disrupting chemicals and the risk of gestational diabetes mellitus: a systematic review and meta-analysis	Yan D, Jiao Y, Yan H, Liu T, Yan H, Yuan J.	Environmental health : a global access science source	10.1186/s12940-022-00858-8
Enhanced toxicity effects of iron particles together with PFOA in drinking water	Qin X, Zhuang Y, Ma J, Liu S, Shi B.	Environmental pollution (Barking, Essex : 1987)	10.1016/j.envpol.2022.119919
Enhancing Regulations to Reduce Exposure to PFAS - Federal Action on "Forever Chemicals"	Braun JM.	The New England journal of medicine	10.1056/NEJMp2303333
Enrichment of poly- and perfluoroalkyl substances (PFAS) in the surface microlayer and foam in synthetic and natural waters	Schaefer CE, Lemes MCS, Schwichtenberg T, Field JA.	Journal of hazardous materials	10.1016/j.jhazmat.2022.129782
Environment occurrence of perfluoroalkyl acids and associated human health risks near a major fluorochemical manufacturing park in southwest of China	Fang S, Sha B, Yin H, Bian Y, Yuan B, Cousins IT.	Journal of hazardous materials	10.1016/j.jhazmat.2020.122617
Environmental and health impacts of PFAS: Sources, distribution and sustainable management in North Carolina (USA)	Ehsan MN, Riza M, Pervez MN, Khyum MMO, Liang Y, Naddeo V.	The Science of the total environment	10.1016/j.scitotenv.2023.163123
Environmental and human relevant PFOS and PFOA doses alter human mesenchymal stem cell self-renewal, adipogenesis and osteogenesis	Liu S, Yang R, Yin N, Wang YL, Faiola F.	Ecotoxicology and environmental safety	10.1016/j.ecoenv.2018.11.064
Environmental Assessment of Various End-of-Life Pathways for Treating Per- and Polyfluoroalkyl Substances in Spent Fire-Extinguishing Waters	Maga D, Aryan V, Bruzzano S.	Environmental toxicology and chemistry	10.1002/etc.4803
Environmental chemicals change extracellular lipidome of mature human white adipocytes	Burkhardt P, Palma-Duran SA, Tuck ARR, Norgren K, Li X, Nikiforova V, Griffin JL, Munic Kos V.	Chemosphere	10.1016/j.chemosphere.2023.140852
Environmental explanation of prostate cancer progression based on the comprehensive analysis of perfluorinated compounds	Wei Y, He H, Han T, Wang B, Ji P, Wu X, Qian J, Shao P.	Ecotoxicology and environmental safety	10.1016/j.ecoenv.2023.115267
Environmental exposure and ecological risk of perfluorinated substances (PFASs) in the Shaying River Basin, China	Zhang YH, Ding TT, Huang ZY, Liang HY, Du SL, Zhang J, Li HX.	Chemosphere	10.1016/j.chemosphere.2023.139537
Environmental exposure and ecotoxicological properties of a new-generation fluorosurfactant (cC(6) O(4) ): A comparison with selected legacy perfluoroalkyl acids	Bizzotto E, Bonetto A, Marcomini A, Vighi M.	Integrated environmental assessment and management	10.1002/ieam.4794
Environmental exposure to legacy and emerging per- and polyfluoroalkyl substances and endometriosis in women of childbearing age	Ao J, Zhang R, Huo X, Zhu W, Zhang J.	The Science of the total environment	10.1016/j.scitotenv.2023.167838
Environmental exposure to per- and polyfluoroalkyl substances and sleep disturbance in pregnant women: A prospective cohort study	Huang Y, Nian M, Yu G, Tian Y, Zhang J, Jiang F, Zhang J; Shanghai Birth Cohort.	The Science of the total environment	10.1016/j.scitotenv.2022.156869
Environmental exposure to per- and polyfluoroalkyl substances mixture and male reproductive hormones	Luo K, Liu X, Nian M, Wang Y, Qiu J, Yu H, Chen X, Zhang J; Shanghai Birth Cohort.	Environment international	10.1016/j.envint.2021.106496
Environmental exposure to perfluoroalkyl substances in early pregnancy, maternal glucose homeostasis and the risk of gestational diabetes: A prospective cohort study	Yu G, Jin M, Huang Y, Aimuzi R, Zheng T, Nian M, Tian Y, Wang W, Luo Z, Shen L, Wang X, Du Q, Xu W, Zhang J; Shanghai Birth Cohort Study.	Environment international	10.1016/j.envint.2021.106621
Environmental Fate of Cl-PFPECAs: Accumulation of Novel and Legacy Perfluoroalkyl Compounds in Real-World Vegetation and Subsoils	Davis MJB, Evich MG, Goodrow SM, Washington JW.	Environmental science & technology	10.1021/acs.est.3c00665
Environmental Fate of Cl-PFPECAs: Predicting the Formation of PFAS Transformation Products in New Jersey Soils	Evich MG, Davis M, Weber EJ, Tebes-Stevens C, Acrey B, Henderson WM, Goodrow S, Bergman E, Washington JW.	Environmental science & technology	10.1021/acs.est.1c06126
Environmental impacts, exposure pathways, and health effects of PFOA and PFOS	Wee SY, Aris AZ.	Ecotoxicology and environmental safety	10.1016/j.ecoenv.2023.115663
Environmental Medicine: Exploring the Pollutome for Solutions to Chronic Diseases	Fine AM, Patrick L.	Physical medicine and rehabilitation clinics of North America	10.1016/j.pmr.2022.04.010
Environmental perfluoroalkyl acid exposures are associated with liver disease characterized by apoptosis and altered serum adipocytokines	Bassler J, Ducatman A, Elliott M, Wen S, Wahlang B, Barnett J, Cave MC.	Environmental pollution (Barking, Essex : 1987)	10.1016/j.envpol.2019.01.064
Environmental pollutant exposure associated with altered early-life gut microbiome: Results from a birth cohort study	Naspolini NF, Meyer A, Moreira JC, Sun H, Froes-Asmus CIR, Dominguez-Bello MG.	Environmental research	10.1016/j.envres.2021.112545
Environmental pollutants in blood donors: The multicentre Norwegian donor study	Averina M, Hervig T, Huber S, Kjaer M, Kristoffersen EK, Bolann B.	Transfusion medicine (Oxford, England)	10.1111/tme.12662
Environmental Risk Assessment Resulting from Sediment Contamination with Perfluoroalkyl Substances	Gałęzowska G, Rogowska J, Olkowska E, Ratajczyk W, Wolska L.	Molecules (Basel, Switzerland)	10.3390/molecules26010116
Environmental Source Tracking of Per- and Polyfluoroalkyl Substances within a Forensic Context: Current and Future Techniques	Charbonnet JA, Rodowa AE, Joseph NT, Guelfo JL, Field JA, Jones GD, Higgins CP, Helbling DE, Houtz EF.		10.1021/acs.est.0c08506
Environmental Sources, Chemistry, Fate, and Transport of Per- and Polyfluoroalkyl Substances: State of the Science, Key Knowledge Gaps, and Recommendations Presented at the August 2019 SETAC Focus Topic Meeting	Guelfo JL, Korzeniowski S, Mills MA, Anderson J, Anderson RH, Arblaster JA, Conder JM, Cousins IT, Dasu K, Henry BJ, Lee LS, Liu J, McKenzie ER, Willey J.	Environmental toxicology and chemistry	10.1002/etc.5182
Environmental toxicants and placental function	Bloom MS, Varde M, Newman RB.	Best practice & research. Clinical obstetrics & gynaecology	10.1016/j.bpobgyn.2022.09.003
Environmental toxicants in breast milk of Norwegian mothers and gut bacteria composition and metabolites in their infants at 1 month	Iszatt N, Janssen S, Lenters V, Dahl C, Stigum H, Knight R, Mandal S, Peddada S, González A, Midtvedt T, Eggesbø M.	Microbiome	10.1186/s40168-019-0645-2
Epidemiology Evidence for Health Effects of 150 per- and Polyfluoroalkyl Substances: A Systematic Evidence Map	Radke EG, Wright JM, Christensen K, Lin CJ, Goldstone AE, Lemeris C, Thayer KA.	Environmental health perspectives	10.1289/EHP11185
Epigenetic changes by per- and polyfluoroalkyl substances (PFAS)	Kim S, Thapar I, Brooks BW.	Environmental pollution (Barking, Essex : 1987)	10.1016/j.envpol.2021.116929
Epigenetic Modifications, and Alterations in Cell Cycle and Apoptosis Pathway in A549 Lung Carcinoma Cell Line upon Exposure to Perfluoroalkyl Substances	Jabeen M, Fayyaz M, Irudayaraj J.	Toxics	10.3390/toxics8040112
Epigenetic toxicity and cytotoxicity of perfluorooctanoic acid and its effects on gene expression in embryonic mouse hypothalamus cells	Kim H, Hong MW, Bae YH, Lee SJ.	Arhiv za higijenu rada i toksikologiju	10.2478/aiht-2021-72-3555
Epigenetic toxicity of PFOA and GenX in HepG2 cells and their role in lipid metabolism	Wen Y, Mirji N, Irudayaraj J.	Toxicology in vitro : an international journal published in association with BIBRA	10.1016/j.tiv.2020.104797
Epigenetics in the Anthropocene: an interview with Oskar Karlsson	Karlsson O.	Epigenomics	10.2217/epi-2022-0044
Establishing Chronic Toxicity Effect Levels for Zebrafish (Danio rerio) Exposed to Perfluorooctane Sulfonate	Pandelides Z, Arblaster J, Conder J.	Environmental toxicology and chemistry	10.1002/etc.5768
Estimated exposure to perfluoroalkyl substances during infancy and serum-adipokine concentrations in later childhood	Grandjean P, Shih YH, Jørgensen LH, Nielsen F, Weihe P, Budtz-Jørgensen E.	Pediatric research	10.1038/s41390-023-02665-4
EStimating Contaminants tRansfers Over Complex food webs (ESCROC): An innovative Bayesian method for estimating POP's biomagnification in aquatic food webs	Ballutaud M, Drouineau H, Carassou L, Munoz G, Chevillot X, Labadie P, Budzinski H, Lobry J.	The Science of the total environment	10.1016/j.scitotenv.2018.12.058
Estimating Environmental Hazard and Risks from Exposure to Per- and Polyfluoroalkyl Substances (PFASs): Outcome of a SETAC Focused Topic Meeting	Johnson MS, Buck RC, Cousins IT, Weis CP, Fenton SE.	Environmental toxicology and chemistry	10.1002/etc.4784
Estimating historical exposure to perfluoroalkyl acids in Security, Fountain, and Widefield Colorado: use of water-infrastructure blending and toxicokinetic models	Meeks J, Mass S, Adgate JL, Barton K, Singha K, McCray JE, Starling AP, Higgins CP.	Environmental science. Processes & impacts	10.1039/d2em00337f
Estimating the relative magnitudes of adsorption to solid-water and air/oil-water interfaces for per- and poly-fluoroalkyl substances	Brusseau ML.	Environmental pollution (Barking, Essex : 1987)	10.1016/j.envpol.2019.113102
Estimation of per- and polyfluoroalkyl substances (PFAS) half-lives in human studies: a systematic review and meta-analysis	Rosato I, Bonato T, Fletcher T, Batzella E, Canova C.	Environmental research	10.1016/j.envres.2023.117743
Estimation of the Half-Lives of Recently Detected Per- and Polyfluorinated Alkyl Ethers in an Exposed Community	Wallis DJ, Kotlarz N, Knappe DRU, Collier DN, Lea CS, Reif D, McCord J, Strynar M, DeWitt JC, Hoppin JA.	Environmental science & technology	10.1021/acs.est.2c08241
Estimation of Transport Parameters of Perfluoroalkyl Acids (PFAAs) in Unsaturated Porous Media: Critical Experimental and Modeling Improvements	Stults JF, Choi YJ, Schaefer CE, Illangasekare TH, Higgins CP.	Environmental science & technology	10.1021/acs.est.2c00819
Estrogenic Activity of Perfluoro Carboxylic and Sulfonic Acids in Rainbow Trout Estrogen Receptor Binding and Liver Slice Vtg mRNA Expression Assays	Tapper MA, Denny JS, Sheedy BR, Johnson B, Kolanczyk RC.	Applied in vitro toxicology	10.1089/aivt.2022.0013
EU need to protect its environment from toxic per- and polyfluoroalkyl substances	Sonne C, Jenssen BM, Rinklebe J, Lam SS, Hansen M, Bossi R, Gustavson K, Dietz R.	The Science of the total environment	10.1016/j.scitotenv.2023.162770
Evaluating maternal exposure to an environmental per and polyfluoroalkyl substances (PFAS) mixture during pregnancy: Adverse maternal and fetoplacental effects in a New Zealand White (NZW) rabbit model	Crute CE, Hall SM, Landon CD, Garner A, Everitt JI, Zhang S, Blake B, Olofsson D, Chen H, Murphy SK, Stapleton HM, Feng L.	The Science of the total environment	10.1016/j.scitotenv.2022.156499
Evaluating Neutral PFAS for Potential Dermal Absorption from the Gas Phase	Kissel JC, Titaley IA, Muensterman DJ, Field JA.	Environmental science & technology	10.1021/acs.est.2c08835
Evaluating the potential of KOH-modified composite biochar amendment to alleviate the ecotoxicity of perfluorooctanoic acid-contaminated sediment on Bellamya aeruginosa	Xiang J, Mi Y, Luo B, Gong S, Zhou Y, Ma T.	Ecotoxicology and environmental safety	10.1016/j.ecoenv.2021.112346
Evaluation of 147 perfluoroalkyl substances for immunotoxic and other (patho)physiological activities through phenotypic screening of human primary cells	Houck KA, Friedman KP, Feshuk M, Patlewicz G, Smeltz M, Clifton MS, Wetmore BA, Velichko S, Berenyi A, Berg EL.	ALTEX	10.14573/altex.2203041
Evaluation of 5-day In Vivo Rat Liver and Kidney With High-throughput Transcriptomics for Estimating Benchmark Doses of Apical Outcomes	Gwinn WM, Auerbach SS, Parham F, Stout MD, Waidyanatha S, Mutlu E, Collins B, Paules RS, Merrick BA, Ferguson S, Ramaiahgari S, Bucher JR, Sparrow B, Toy H, Gorospe J, Machesky N, Shah RR, Balik-Meisner MR, Mav D, Phadke DP, Roberts G, DeVito MJ.	Toxicological sciences : an official journal of the Society of Toxicology	10.1093/toxsci/kfaa081
Evaluation of Cyto-genotoxicity of Perfluorooctane Sulfonate (PFOS) to Allium cepa	Sivaram AK, Logeshwaran P, Surapaneni A, Shah K, Crosbie N, Rogers Z, Lee E, Venkatraman K, Kannan K, Naidu R, Megharaj M.	Environmental toxicology and chemistry	10.1002/etc.4905
Evaluation of Developmental Toxicity, Developmental Neurotoxicity, and Tissue Dose in Zebrafish Exposed to GenX and Other PFAS	Gaballah S, Swank A, Sobus JR, Howey XM, Schmid J, Catron T, McCord J, Hines E, Strynar M, Tal T.	Environmental health perspectives	10.1289/EHP5843
Evaluation of Different Extraction Methods for the Analysis of Per- and Polyfluoroalkyl Substances in Dried Blood Spots from the Florida Manatee (Trichechus manatus)	Griffin EK, Aristizabal-Henao JJ, Bowden JA.	Environmental toxicology and chemistry	10.1002/etc.5175
Evaluation of human biomonitoring data in a health risk based context: An updated analysis of population level data from the Canadian Health Measures Survey	Faure S, Noisel N, Werry K, Karthikeyan S, Aylward LL, St-Amand A.	International journal of hygiene and environmental health	10.1016/j.ijheh.2019.07.009
Evaluation of Maternal, Embryo, and Placental Effects in CD-1 Mice following Gestational Exposure to Perfluorooctanoic Acid (PFOA) or Hexafluoropropylene Oxide Dimer Acid (HFPO-DA or GenX)	Blake BE, Cope HA, Hall SM, Keys RD, Mahler BW, McCord J, Scott B, Stapleton HM, Strynar MJ, Elmore SA, Fenton SE.	Environmental health perspectives	10.1289/EHP6233
Evaluation of morpho-physiological traits and contaminant accumulation ability in Lemna minor L. treated with increasing perfluorooctanoic acid (PFOA) concentrations under laboratory conditions	Pietrini F, Passatore L, Fischetti E, Carloni S, Ferrario C, Polesello S, Zacchini M.	The Science of the total environment	10.1016/j.scitotenv.2019.133828
Evaluation of Neural Regulation and Microglial Responses to Brain Injury in Larval Zebrafish Exposed to Perfluorooctane Sulfonate	Paquette SE, Martin NR, Rodd A, Manz KE, Allen E, Camarillo M, Weller HI, Pennell K, Plavicki JS.	Environmental health perspectives	10.1289/EHP12861
Evaluation of per- and poly-fluorinated alkyl substances (PFAS) in livers of bottlenose dolphins (Tursiops truncatus) found stranded along the northern Adriatic Sea	Sciancalepore G, Pietroluongo G, Centelleghe C, Milan M, Bonato M, Corazzola G, Mazzariol S.	Environmental pollution (Barking, Essex : 1987)	10.1016/j.envpol.2021.118186
Evaluation of per- and polyfluoroalkyl substances (PFAS) in leachate, gas condensate, stormwater and groundwater at landfills	Chen Y, Zhang H, Liu Y, Bowden JA, Tolaymat TM, Townsend TG, Solo-Gabriele HM.	Chemosphere	10.1016/j.chemosphere.2023.137903
Evaluation of Per- and Polyfluoroalkyl Substances (PFAS) In Vitro Toxicity Testing for Developmental Neurotoxicity	Carstens KE, Freudenrich T, Wallace K, Choo S, Carpenter A, Smeltz M, Clifton MS, Henderson WM, Richard AM, Patlewicz G, Wetmore BA, Paul Friedman K, Shafer T.	Chemical research in toxicology	10.1021/acs.chemrestox.2c00344
Evaluation of potential sodium-iodide symporter (NIS) inhibitors using a secondary Fischer rat thyroid follicular cell (FRTL-5) radioactive iodide uptake (RAIU) assay	Buckalew AR, Wang J, Murr AS, Deisenroth C, Stewart WM, Stoker TE, Laws SC.	Archives of toxicology	10.1007/s00204-020-02664-y
Evaluation of Published Bioconcentration Factor (BCF) and Bioaccumulation Factor (BAF) Data for Per- and Polyfluoroalkyl Substances Across Aquatic Species	Burkhard LP.	Environmental toxicology and chemistry	10.1002/etc.5010
Evaluation of sealants to mitigate the release of per- and polyfluoroalkyl substances (PFAS) from AFFF-impacted concrete: Characterization and forecasting	Vo PHN, Key TA, Le TH, McDonough JT, Porman S, Fiorenza S, Nguyen HTM, Dao VTN, Mueller JF, Thai PK.	Water research X	10.1016/j.wroa.2023.100195
Evaluation of Single and Joint Toxicity of Perfluorinated Carboxylic Acids and Copper to Metal-Resistant Arthrobacter Strains	Cai Y, Chen H, Chen H, Li H, Yang S, Wang F.	International journal of environmental research and public health	10.3390/ijerph16010135
Evaluation of single and joint toxicity of perfluorooctanoic acid and arsenite to earthworm (Eisenia fetida): A multi-biomarker approach	Wang Z, Qi F, Shi Y, Zhang Z, Liu L, Li C, Meng L.	Chemosphere	10.1016/j.chemosphere.2021.132942
Evaluation of the developmental toxicity of perfluorooctanesulfonate in the Anuran, Silurana tropicalis	Fort DJ, Mathis MB, Guiney PD, Weeks JA.	Journal of applied toxicology : JAT	10.1002/jat.3727
Evaluation of the ecological impacts of short- and long-chain perfluoroalkyl acids on constructed wetland systems: Perfluorobutyric acid and perfluorooctanoic acid	Xiao J, Huang J, Wang Y, Qian X, Cao M.	Journal of hazardous materials	10.1016/j.jhazmat.2022.128863
Evaluation of the Effect of Perfluorohexane Sulfonate on the Proliferation of Human Liver Cells	Sim KH, Oh HS, Lee C, Eun H, Lee YJ.	International journal of environmental research and public health	10.3390/ijerph20196868
Evaluation of the Estrogenic/Antiestrogenic Activities of Perfluoroalkyl Substances and Their Interactions with the Human Estrogen Receptor by Combining In Vitro Assays and In Silico Modeling	Li J, Cao H, Feng H, Xue Q, Zhang A, Fu J.	Environmental science & technology	10.1021/acs.est.0c03468
Evaluation of the individual and combined toxicity of perfluoroalkyl substances to human liver cells using biomarkers of oxidative stress	Ojo AF, Xia Q, Peng C, Ng JC.	Chemosphere	10.1016/j.chemosphere.2021.130808
Evaluation of Transcriptomic Responses in Livers of Mice Exposed to the Short-Chain PFAS Compound HFPO-DA	Heintz MM, Chappell GA, Thompson CM, Haws LC.	Frontiers in toxicology	10.3389/ftox.2022.937168
Evidence of Air Dispersion: HFPO-DA and PFOA in Ohio and West Virginia Surface Water and Soil near a Fluoropolymer Production Facility	Galloway JE, Moreno AVP, Lindstrom AB, Strynar MJ, Newton S, May AA, Weavers LK.	Environmental science & technology	10.1021/acs.est.9b07384
Examining NTA performance and potential using fortified and reference house dust as part of EPA's Non-Targeted Analysis Collaborative Trial (ENTACT)	Newton SR, Sobus JR, Ulrich EM, Singh RR, Chao A, McCord J, Laughlin-Toth S, Strynar M.	Analytical and bioanalytical chemistry	10.1007/s00216-020-02658-w
Examining sorption of perfluoroalkyl substances (PFAS) in biochars and other carbon-rich materials	Fabregat-Palau J, Vidal M, Rigol A.	Chemosphere	10.1016/j.chemosphere.2022.134733
Examining the impact of nanoplastics and PFAS exposure on immune functions through inhibition of secretory immunoglobin A in human breast milk	Enyoh CE, Ovuoraye PE, Qingyue W, Wang W.	Journal of hazardous materials	10.1016/j.jhazmat.2023.132103
Examining the robustness and concentration dependency of PFAS air-water and NAPL-water interfacial adsorption coefficients	Brusseau ML.	Water research	10.1016/j.watres.2020.116778
Expanding Per- and Polyfluoroalkyl Substances Coverage in Nontargeted Analysis Using Data-Independent Analysis and IonDecon	Koelmel JP, Kummer M, Chevallier O, Hindle R, Hunt K, Camacho CG, Abril N, Gill EL, Beecher CWW, Garrett TJ, Yost RA, Townsend TG, Klein C, Rennie EE, Bowden JA, Godri Pollitt KJ.	Journal of the American Society for Mass Spectrometry	10.1021/jasms.3c00244
Expanding the applicability domain of QSPRs for predicting water solubility and vapor pressure of PFAS	Sosnowska A, Mudlaff M, Gorb L, Bulawska N, Zdybel S, Bakker M, Peijnenburg W, Puzyn T.	Chemosphere	10.1016/j.chemosphere.2023.139965
Exploration of the developmental toxicity of TCS and PFOS to zebrafish embryos by whole-genome gene expression analyses	Dong G, Zhang R, Huang H, Lu C, Xia Y, Wang X, Du G.	Environmental science and pollution research international	10.1007/s11356-021-14527-9
Exploring associations between prenatal exposure to multiple endocrine disruptors and birth weight with exposure continuum mapping	Pearce JL, Neelon B, Bloom MS, Buckley JP, Ananth CV, Perera F, Vena J, Hunt K; program collaborators for Environmental influences on Child Health Outcomes.	Environmental research	10.1016/j.envres.2021.111386
Exploring Community Psychosocial Stress Related to Per- and Poly-Fluoroalkyl Substances (PFAS) Contamination: Lessons Learned from a Qualitative Study	Calloway EE, Chiappone AL, Schmitt HJ, Sullivan D, Gerhardstein B, Tucker PG, Rayman J, Yaroch AL.	International journal of environmental research and public health	10.3390/ijerph17238706
Exploring open cheminformatics approaches for categorizing per- and polyfluoroalkyl substances (PFASs)	Sha B, Schymanski EL, Ruttkies C, Cousins IT, Wang Z.	Environmental science. Processes & impacts	10.1039/c9em00321e
Exploring Potential Carcinogenic Activity of Per- and Polyfluorinated Alkyl Substances Utilizing High-Throughput Toxicity Screening Data	Singh N, Hsieh CYJ.	International journal of toxicology	10.1177/10915818211010490
Exploring Route-Specific Pharmacokinetics of PFAS in Mice by Coupling in Vivo Tests and Physiologically Based Toxicokinetic Models	Zhu Y, Pan X, Jia Y, Yang X, Song X, Ding J, Zhong W, Feng J, Zhu L.	Environmental health perspectives	10.1289/EHP11969
Exploring the Accumulation Behavior and Heterogeneity of Perfluorooctanesulfonic Acid in Zebrafish Primary Organ Cells by Single-Cell Mass Cytometry	Deng J, Zeng X, He C, Zhong D, Wu Y, Liu N, Luan T, Yang Y.	Analytical chemistry	10.1021/acs.analchem.3c02398
Exploring the Effects of Metabolism-Disrupting Chemicals on Pancreatic α-Cell Viability, Gene Expression and Function: A Screening Testing Approach	Al-Abdulla R, Ferrero H, Boronat-Belda T, Soriano S, Quesada I, Alonso-Magdalena P.	International journal of molecular sciences	10.3390/ijms24021044
Exploring the Occurrence of Organic Contaminants in Human Semen through an Innovative LC-HRMS-Based Methodology Suitable for Target and Nontarget Analysis	Sánchez-Resino E, Marquès M, Gutiérrez-Martín D, Restrepo-Montes E, Martínez MÁ, Salas-Huetos A, Babio N, Salas-Salvadó J, Gil-Solsona R, Gago-Ferrero P.	Environmental science & technology	10.1021/acs.est.3c04347
Exposure characteristics of legacy and novel per- and polyfluoroalkyl substances in blood and association with hypertension among low-exposure population	Lin N, Zhang Y, Su S, Feng Y, Wang B, Li Z.	Journal of hazardous materials	10.1016/j.jhazmat.2023.132185
Exposure of Juncus effusus to seven perfluoroalkyl acids: Uptake, accumulation and phytotoxicity	Zhang W, Zhang D, Zagorevski DV, Liang Y.	Chemosphere	10.1016/j.chemosphere.2019.05.258
Exposure of Lemna minor (Common Duckweed) to Mixtures of Uranium and Perfluorooctanoic Acid (PFOA)	Gonzales AK, Donaher SE, Wattier BD, Martinez NE.	Environmental toxicology and chemistry	10.1002/etc.5720
Exposure of male mice to perfluorooctanoic acid induces anxiety-like behaviors by increasing corticotropin-releasing factor in the basolateral amygdala complex	Wang Y, Zhang Y, Shi Z, Di T, Yu W, Chen L.	Chemosphere	10.1016/j.chemosphere.2021.132170
Exposure of Swedish adolescents to elements, persistent organic pollutants (POPs), and rapidly excreted substances - The Riksmaten adolescents 2016-17 national survey	Pineda S, Lignell S, Gyllenhammar I, Lampa E, Benskin JP, Lundh T, Lindh C, Kiviranta H, Glynn A.	International journal of hygiene and environmental health	10.1016/j.ijheh.2023.114196
Exposure pathways and bioaccumulation of per- and polyfluoroalkyl substances in freshwater aquatic ecosystems: Key considerations	Lewis AJ, Yun X, Spooner DE, Kurz MJ, McKenzie ER, Sales CM.	The Science of the total environment	10.1016/j.scitotenv.2022.153561
Exposure routes, bioaccumulation and toxic effects of per- and polyfluoroalkyl substances (PFASs) on plants: A critical review	Li J, Sun J, Li P.	Environment international	10.1016/j.envint.2021.106891
Exposure to a mixture of legacy, alternative, and replacement per- and polyfluoroalkyl substances (PFAS) results in sex-dependent modulation of cholesterol metabolism and liver injury	Roth K, Yang Z, Agarwal M, Liu W, Peng Z, Long Z, Birbeck J, Westrick J, Liu W, Petriello MC.	Environment international	10.1016/j.envint.2021.106843
Exposure to a mixture of per-and polyfluoroalkyl substances modulates pulmonary expression of ACE2 and circulating hormones and cytokines	Yang Z, Roth K, Ding J, Kassotis CD, Mor G, Petriello MC.	Toxicology and applied pharmacology	10.1016/j.taap.2022.116284
Exposure to dust organophosphate and replacement brominated flame retardants during infancy and risk of subsequent adverse respiratory outcomes	Mendy A, Percy Z, Braun JM, Lanphear B, La Guardia MJ, Hale R, Yolton K, Chen A.	Environmental research	10.1016/j.envres.2023.116560
Exposure to Emerging and Legacy Polyfluoroalkyl Substances in the Sixth Total Diet Study - China, 2016-2019	Wang Y, Gao X, Liu J, Lyu B, Li J, Zhao Y, Wu Y.	China CDC weekly	10.46234/ccdcw2022.042
Exposure to endocrine disrupting chemicals (EDCs) and cardiometabolic indices during pregnancy: The HOME Study	Vuong AM, Braun JM, Sjödin A, Calafat AM, Yolton K, Lanphear BP, Chen A.	Environment international	10.1016/j.envint.2021.106747
Exposure to endocrine-disrupting chemicals and risk of gestational hypertension and preeclampsia: A systematic review and meta-analysis	Hirke A, Varghese B, Varade S, Adela R.	Environmental pollution (Barking, Essex : 1987)	10.1016/j.envpol.2022.120828
Exposure to Environmentally Relevant Levels of PFAS Causes Metabolic Changes in the Freshwater Amphipod Austrochiltonia subtenuis	Sinclair GM, Long SM, Singh N, Coggan TL, Askeland MPJ, Jones OAH.	Metabolites	10.3390/metabo12111135
Exposure to GenX and its novel analogs disrupts fatty acid metabolism in male mice	Guo H, Sheng N, Guo Y, Wu C, Xie W, Dai J.	Environmental pollution (Barking, Essex : 1987)	10.1016/j.envpol.2021.118202
Exposure to GenX and Its Novel Analogs Disrupts Hepatic Bile Acid Metabolism in Male Mice	Guo H, Chen J, Zhang H, Yao J, Sheng N, Li Q, Guo Y, Wu C, Xie W, Dai J.	Environmental science & technology	10.1021/acs.est.1c02471
Exposure to hexafluoropropylene oxide dimer acid (HFPO-DA) disturbs the gut barrier function and gut microbiota in mice	Xie X, Zhou J, Hu L, Shu R, Zhang M, Xiong Z, Wu F, Fu Z.	Environmental pollution (Barking, Essex : 1987)	10.1016/j.envpol.2021.117934
Exposure to high levels of PFAS through drinking water is associated with increased risk of type 2 diabetes-findings from a register-based study in Ronneby, Sweden	Xu Y, Jakobsson K, Harari F, Andersson EM, Li Y.	Environmental research	10.1016/j.envres.2023.115525
Exposure to legacy and novel perfluoroalkyl substance disturbs the metabolic homeostasis in pregnant women and fetuses: A metabolome-wide association study	Li Y, Lu X, Yu N, Li A, Zhuang T, Du L, Tang S, Shi W, Yu H, Song M, Wei S.	Environment international	10.1016/j.envint.2021.106627
Exposure to novel and legacy per- and polyfluoroalkyl substances (PFASs) and associations with type 2 diabetes: A case-control study in East China	Han X, Meng L, Zhang G, Li Y, Shi Y, Zhang Q, Jiang G.	Environment international	10.1016/j.envint.2021.106637
Exposure to per- and polyfluorinated alkyl substances in pregnant Brazilian women and its association with fetal growth	Souza MCO, Saraiva MCP, Honda M, Barbieri MA, Bettiol H, Barbosa F, Kannan K.	Environmental research	10.1016/j.envres.2020.109585
Exposure to per- and polyfluoroalkyl substances (PFAS) and type 2 diabetes risk	Roth K, Petriello MC.	Frontiers in endocrinology	10.3389/fendo.2022.965384
Exposure to per- and Polyfluoroalkyl Substances and Markers of Liver Injury: A Systematic Review and Meta-Analysis	Costello E, Rock S, Stratakis N, Eckel SP, Walker DI, Valvi D, Cserbik D, Jenkins T, Xanthakos SA, Kohli R, Sisley S, Vasiliou V, La Merrill MA, Rosen H, Conti DV, McConnell R, Chatzi L.	Environmental health perspectives	10.1289/EHP10092
Exposure to per- and polyfluoroalkyl substances in early pregnancy, risk of gestational diabetes mellitus, potential pathways, and influencing factors in pregnant women: A nested case-control study	Zang L, Liu X, Xie X, Zhou X, Pan Y, Dai J.	Environmental pollution (Barking, Essex : 1987)	10.1016/j.envpol.2023.121504
Exposure to perfluoroalkyl and polyfluoroalkyl substances and risk of stroke in adults: a meta-analysis	Chang MC, Chung SM, Kwak SG.	Reviews on environmental health	10.1515/reveh-2023-0021
Exposure to per-fluoroalkyl and polyfluoroalkyl substances leads to immunotoxicity: epidemiological and toxicological evidence	DeWitt JC, Blossom SJ, Schaider LA.	Journal of exposure science & environmental epidemiology	10.1038/s41370-018-0097-y
Exposure to Perfluoroalkyl Chemicals and Cardiovascular Disease: Experimental and Epidemiological Evidence	Meneguzzi A, Fava C, Castelli M, Minuz P.	Frontiers in endocrinology	10.3389/fendo.2021.706352
Exposure to perfluoroalkyl substances (PFAS) and association with thyroid hormones in adolescent males	Freire C, Vela-Soria F, Castiello F, Salamanca-Fernández E, Quesada-Jiménez R, López-Alados MC, Fernandez MF, Olea N.	International journal of hygiene and environmental health	10.1016/j.ijheh.2023.114219
Exposure to perfluoroalkyl substances and allergic outcomes in children: A systematic review and meta-analysis	Luo Y, Deji Z, Huang Z.	Environmental research	10.1016/j.envres.2020.110145
Exposure to perfluoroalkyl substances and longitudinal changes in bone mineral density in adolescents and young adults: A multi-cohort study	Beglarian E, Costello E, Walker DI, Wang H, Alderete TL, Chen Z, Valvi D, Baumert BO, Rock S, Rubbo B, Aung MT, Gilliland FD, Goran MI, Jones DP, McConnell R, Eckel SP, Conti DV, Goodrich JA, Chatzi L.	Environmental research	10.1016/j.envres.2023.117611
Exposure to Perfluoroalkyl Substances and Mortality for COVID-19: A Spatial Ecological Analysis in the Veneto Region (Italy)	Catelan D, Biggeri A, Russo F, Gregori D, Pitter G, Da Re F, Fletcher T, Canova C.	International journal of environmental research and public health	10.3390/ijerph18052734
Exposure to perfluoroalkyl substances and neurodevelopment in 2-year-old children: A prospective cohort study	Luo F, Chen Q, Yu G, Huo X, Wang H, Nian M, Tian Y, Xu J, Zhang J, Zhang J; Shanghai Birth Cohort.	Environment international	10.1016/j.envint.2022.107384
Exposure to Perfluoroalkyl Substances During Pregnancy and Fetal BDNF Level: A Prospective Cohort Study	Yu G, Luo F, Nian M, Li S, Liu B, Feng L, Zhang J.	Frontiers in endocrinology	10.3389/fendo.2021.653095
Exposure to Perfluoroalkyl Substances in a Cohort of Women Firefighters and Office Workers in San Francisco	Trowbridge J, Gerona RR, Lin T, Rudel RA, Bessonneau V, Buren H, Morello-Frosch R.	Environmental science & technology	10.1021/acs.est.9b05490
Exposure to perfluoroalkyl substances in early pregnancy and risk of sporadic first trimester miscarriage	Wikström S, Hussein G, Lingroth Karlsson A, Lindh CH, Bornehag CG.	Scientific reports	10.1038/s41598-021-82748-6
Exposure to perfluoroalkyl substances in early pregnancy and the risk of hypertensive disorders of pregnancy: A nested case-control study in Guangxi, China	Liu B, Wei B, Mo M, Song Y, Tang C, Tang P, Guo X, Tan C, Liu S, Huang D, Qiu X.	Chemosphere	10.1016/j.chemosphere.2021.132468
Exposure to perfluoroalkyl substances in waste recycling workers: Distributions in paired human serum and urine	Peng L, Xu W, Zeng Q, Sun F, Guo Y, Zhong S, Wang F, Chen D.	Environment international	10.1016/j.envint.2021.106963
Exposure to perfluorobutane sulfonate and perfluorooctanesulfonic acid disrupts the production of angiogenesis factors and stress responses in human placental syncytiotrophoblast	Pham A, Zhang J, Feng L.	Reproductive toxicology (Elmsford, N.Y.)	10.1016/j.reprotox.2020.10.013
Exposure to perfluorooctane sulfonate based on circadian rhythm changes the fecundity and expression of certain genes on the hypothalamic-pituitary-gonadal-liver axis of female zebrafish	Bao M, Huang W, Au WW, Zheng S, Liu C, Huang Y, Wu K.	Toxicology and applied pharmacology	10.1016/j.taap.2019.114715
Exposure to perfluorooctane sulfonate in vitro perturbs the quality of porcine oocytes via induction of apoptosis	Chen J, Miao Y, Gao Q, Cui Z, Xiong B.	Environmental pollution (Barking, Essex : 1987)	10.1016/j.envpol.2021.117508
Exposure to perfluorooctane sulfonate reduced cell viability and insulin release capacity of β cells	Qin W, Ren X, Zhao L, Guo L.	Journal of environmental sciences (China)	10.1016/j.jes.2021.07.004
Exposure to perfluorooctanesulfonate (PFOS) but not perflurorooctanoic acid (PFOA) at ppb concentration induces chronic toxicity in Daphnia carinata	Logeshwaran P, Sivaram AK, Surapaneni A, Kannan K, Naidu R, Megharaj M.	The Science of the total environment	10.1016/j.scitotenv.2020.144577
Exposure to perfluorooctanoic acid (PFOA) decreases neutrophil migration response to injury in zebrafish embryos	Pecquet AM, Maier A, Kasper S, Sumanas S, Yadav J.	BMC research notes	10.1186/s13104-020-05255-3
Exposure to Perfluorooctanoic Acid Induces Cognitive Deficits via Altering Gut Microbiota Composition, Impairing Intestinal Barrier Integrity, and Causing Inflammation in Gut and Brain	Shi L, Zheng J, Yan S, Li Y, Wang Y, Liu X, Xiao C.	Journal of agricultural and food chemistry	10.1021/acs.jafc.0c05834
Exposure to perfluorooctanoic acid leads to promotion of pancreatic cancer	Kamendulis LM, Hocevar JM, Stephens M, Sandusky GE, Hocevar BA.	Carcinogenesis	10.1093/carcin/bgac005
Exposure to PFAS and small for gestational age new-borns: A birth records study in Veneto Region (Italy)	Manea S, Salmaso L, Lorenzoni G, Mazzucato M, Russo F, Mantoan D, Martuzzi M, Fletcher T, Facchin P.	Environmental research	10.1016/j.envres.2020.109282
Exposure to PFAS is Associated with Telomere Length Dynamics and Demographic Responses of an Arctic Top Predator	Sebastiano M, Angelier F, Blévin P, Ribout C, Sagerup K, Descamps S, Herzke D, Moe B, Barbraud C, Bustnes JO, Gabrielsen GW, Chastel O.	Environmental science & technology	10.1021/acs.est.0c03099
Exposure to PFOA and its novel analogs disrupts lipid metabolism in zebrafish	Sun W, Zhang X, Qiao Y, Griffin N, Zhang H, Wang L, Liu H.	Ecotoxicology and environmental safety	10.1016/j.ecoenv.2023.115020
Exposure to select PFAS and PFAS mixtures alters response to platinum-based chemotherapy in endometrial cancer cell lines	Rickard BP, Overchuk M, Tulino J, Tan X, Ligler FS, Bae-Jump VL, Fenton SE, Rizvi I.	Environmental health : a global access science source	10.1186/s12940-023-01034-2
Exposure to serum perfluoroalkyl substances and biomarkers of liver function: The Korean national environmental health survey 2015-2017	Kim OJ, Kim S, Park EY, Oh JK, Jung SK, Park S, Hong S, Jeon HL, Kim HJ, Park B, Park B, Kim S, Kim B.	Chemosphere	10.1016/j.chemosphere.2023.138208
Exposure, health effects, sensing, and remediation of the emerging PFAS contaminants - Scientific challenges and potential research directions	Bell EM, De Guise S, McCutcheon JR, Lei Y, Levin M, Li B, Rusling JF, Lawrence DA, Cavallari JM, O'Connell C, Javidi B, Wang X, Ryu H.	The Science of the total environment	10.1016/j.scitotenv.2021.146399
Exposures to chemical mixtures during pregnancy and neonatal outcomes: The HOME study	Kalloo G, Wellenius GA, McCandless L, Calafat AM, Sjodin A, Romano ME, Karagas MR, Chen A, Yolton K, Lanphear BP, Braun JM.	Environment international	10.1016/j.envint.2019.105219
Exposures to perfluoroalkyl substances and asthma phenotypes in childhood: an investigation of the COPSAC2010 cohort	Sevelsted A, Pedersen CT, Gürdeniz G, Rasmussen MA, Schullehner J, Sdougkou K, Martin JW, Lasky-Su J, Morin A, Ober C, Schoos AM, Stokholm J, Bønnelykke K, Chawes B, Bisgaard H.	EBioMedicine	10.1016/j.ebiom.2023.104699
Extracellular Vesicles altered by a Per- and Polyfluoroalkyl Substance Mixture: In Vitro Dose-Dependent Release, Chemical Content, and MicroRNA Signatures involved in Liver Health	Carberry CK, Bangma J, Koval L, Keshava D, Hartwell HJ, Sokolsky M, Fry RC, Rager JE.	Toxicological sciences : an official journal of the Society of Toxicology	10.1093/toxsci/kfad108
F-53B and PFOS treatments skew human embryonic stem cell in vitro cardiac differentiation towards epicardial cells by partly disrupting the WNT signaling pathway	Yang R, Liu S, Liang X, Yin N, Ruan T, Jiang L, Faiola F.	Environmental pollution (Barking, Essex : 1987)	10.1016/j.envpol.2020.114153
Factors associated with exposure of pregnant women to perfluoroalkyl acids in North China and health risk assessment	Yang J, Wang H, Du H, Xu L, Liu S, Yi J, Qian X, Chen Y, Jiang Q, He G.	The Science of the total environment	10.1016/j.scitotenv.2018.11.042
Fetal bovine serum attenuating perfluorooctanoic acid-inducing toxicity to multiple human cell lines via albumin binding	Zhang R, Zhang H, Chen B, Luan T.	Journal of hazardous materials	10.1016/j.jhazmat.2020.122109
Fetal Glucocorticoid Mediates the Association between Prenatal Per- and Polyfluoroalkyl Substance Exposure and Neonatal Growth Index: Evidence from a Birth Cohort Study	Cai D, Li QQ, Mohammed Z, Chou WC, Huang J, Kong M, Xie Y, Yu Y, Hu G, Qi J, Zhou Y, Tan W, Lin L, Qiu R, Dong G, Zeng XW.	Environmental science & technology	10.1021/acs.est.2c08831
Field-Based Distribution and Bioaccumulation Factors for Cyclic and Aliphatic Per- and Polyfluoroalkyl Substances (PFASs) in an Urban Sedentary Waterbird Population	Szabo D, Moodie D, Green MP, Mulder RA, Clarke BO.	Environmental science & technology	10.1021/acs.est.2c01965
First report on per- and polyfluoroalkyl substances (PFASs) in coral communities from the Northern South China sea: Occurrence, seasonal variation, and interspecies differences	Xu L, Chen H, Han X, Yu K, Wang Y, Du B, Zeng L.	Environmental pollution (Barking, Essex : 1987)	10.1016/j.envpol.2022.120214
Flexible construct of N vacancies and hydrophobic sites on g-C(3)N(4) by F doping and their contribution to PFOA degradation in photocatalytic ozonation	Chen Z, Chen W, Liao G, Li X, Wang J, Tang Y, Li L.	Journal of hazardous materials	10.1016/j.jhazmat.2022.128222
Fluoro-cotton assisted non-targeted screening of organic fluorine compounds from rice (Oryza sativa L.) grown in perfluoroalkyl substance polluted soil	Xiao HM, Zhao S, Hussain D, Chen JL, Luo D, Wei F, Wang X.	Environmental research	10.1016/j.envres.2022.114801
FluoroMatch 2.0-making automated and comprehensive non-targeted PFAS annotation a reality	Koelmel JP, Stelben P, McDonough CA, Dukes DA, Aristizabal-Henao JJ, Nason SL, Li Y, Sternberg S, Lin E, Beckmann M, Williams AJ, Draper J, Finch JP, Munk JK, Deigl C, Rennie EE, Bowden JA, Godri Pollitt KJ.	Analytical and bioanalytical chemistry	10.1007/s00216-021-03392-7
Fluorotelomer Alcohols' Toxicology Correlates with Oxidative Stress and Metabolism	Yang Y, Meng K, Chen M, Xie S, Chen D.	Reviews of environmental contamination and toxicology	10.1007/398_2020_57
Food, Beverage, and Feedstock Processing Facility Wastewater: a Unique and Underappreciated Source of Contaminants to U.S. Streams	Hubbard LE, Kolpin DW, Givens CE, Blackwell BR, Bradley PM, Gray JL, Lane RF, Masoner JR, McCleskey RB, Romanok KM, Sandstrom MW, Smalling KL, Villeneuve DL.	Environmental science & technology	10.1021/acs.est.1c06821
Framework for risk assessment of PFAS utilizing experimental studies and in-silico models	Deepika D, Rovira J, Sabuz Ó, Balaguer J, Schuhmacher M, Domingo JL, Kumar V.	Environmental research	10.1016/j.envres.2022.112722
From Drinking Water to Individual Body Burden: Modeling Toxicokinetics of Four PFAS	Seltenrich N.	Environmental health perspectives	10.1289/EHP12514
From Waste Collection Vehicles to Landfills: Indication of Per- and Polyfluoroalkyl Substance (PFAS) Transformation	Liu Y, Robey NM, Bowden JA, Tolaymat TM, da Silva BF, Solo-Gabriele HM, Townsend TG.	Environmental science & technology letters	10.1021/acs.estlett.0c00819
Functional benefit and molecular mechanism of vitamin C against perfluorooctanesulfonate-associated leukemia	Li R, Guo C, Li Y, Liang X, Su M.	Chemosphere	10.1016/j.chemosphere.2020.128242
Functionalization strategies of metal-organic frameworks for biomedical applications and treatment of emerging pollutants: A review	Nguyen NTT, Nguyen TTT, Nguyen DTC, Tran TV.	The Science of the total environment	10.1016/j.scitotenv.2023.167295
Gastrodin attenuates perfluorooctanoic acid-induced liver injury by regulating gut microbiota composition in mice	Ma S, Sun Y, Zheng X, Yang Y.	Bioengineered	10.1080/21655979.2021.2009966
Gene-environment interactions in the associations of PFAS exposure with insulin sensitivity and beta-cell function in a Faroese cohort followed from birth to adulthood	Valvi D, Christiani DC, Coull B, Højlund K, Nielsen F, Audouze K, Su L, Weihe P, Grandjean P.	Environmental research	10.1016/j.envres.2023.115600
Genotoxicity assessment of per- and polyfluoroalkyl substances mixtures in human liver cells (HepG2)	Ojo AF, Peng C, Ng JC.	Toxicology	10.1016/j.tox.2022.153359
GenX induces fibroinflammatory gene expression in primary human hepatocytes	Robarts DR, Venneman KK, Gunewardena S, Apte U.	Toxicology	10.1016/j.tox.2022.153259
Gestational and childhood exposure to per- and polyfluoroalkyl substances and cardiometabolic risk at age 12 years	Li N, Liu Y, Papandonatos GD, Calafat AM, Eaton CB, Kelsey KT, Cecil KM, Kalkwarf HJ, Yolton K, Lanphear BP, Chen A, Braun JM.	Environment international	10.1016/j.envint.2020.106344
Gestational and childhood exposure to phthalates and child behavior	Li N, Papandonatos GD, Calafat AM, Yolton K, Lanphear BP, Chen A, Braun JM.	Environment international	10.1016/j.envint.2020.106036
Gestational exposure to GenX induces hepatic alterations by the gut-liver axis in maternal mice: A similar mechanism as PFOA	Xu LL, Chen YK, Zhang QY, Chen LJ, Zhang KK, Li JH, Liu JL, Wang Q, Xie XL.	The Science of the total environment	10.1016/j.scitotenv.2022.153281
Gestational exposure to perfluoroalkyl substances and congenital heart defects: A nested case-control pilot study	Ou Y, Zeng X, Lin S, Bloom MS, Han F, Xiao X, Wang H, Matala R, Li X, Qu Y, Nie Z, Dong G, Liu X.	Environment international	10.1016/j.envint.2021.106567
Gestational exposure to perfluoroalkyl substances is associated with placental DNA methylation and birth size	Wang H, Li W, Yang J, Wang Y, Du H, Han M, Xu L, Liu S, Yi J, Chen Y, Jiang Q, He G.	The Science of the total environment	10.1016/j.scitotenv.2022.159747
Gestational GenX and PFOA exposures induce hepatotoxicity, metabolic pathway, and microbiome shifts in weanling mice	Zhang QY, Xu LL, Zhong MT, Chen YK, Lai MQ, Wang Q, Xie XL.	The Science of the total environment	10.1016/j.scitotenv.2023.168059
Gestational hypertension, preeclampsia, and gestational diabetes mellitus after high exposure to perfluoroalkyl substances from drinking water in Ronneby, Sweden	Ebel M, Rylander L, Fletcher T, Jakobsson K, Nielsen C.	Environmental research	10.1016/j.envres.2023.117316
Gestational Perfluorooctanoic Acid Exposure Inhibits Placental Development by Dysregulation of Labyrinth Vessels and uNK Cells and Apoptosis in Mice	Jiang W, Deng Y, Song Z, Xie Y, Gong L, Chen Y, Kuang H.	Frontiers in physiology	10.3389/fphys.2020.00051
Global DNA methylation mediates the association between serum perfluorooctane sulfonate and carotid intima-media thickness in young and middle-aged Taiwanese populations	Lin CY, Lee HL, Chen CW, Wang C, Sung FC, Su TC.	Ecotoxicology and environmental safety	10.1016/j.ecoenv.2022.113782
Global occurrence and probabilistic environmental health hazard assessment of per- and polyfluoroalkyl substances (PFASs) in groundwater and surface waters	Sims JL, Stroski KM, Kim S, Killeen G, Ehalt R, Simcik MF, Brooks BW.	The Science of the total environment	10.1016/j.scitotenv.2021.151535
Global ocean contamination of per- and polyfluoroalkyl substances: A review of seabird exposure	Sun J, Xing L, Chu J.	Chemosphere	10.1016/j.chemosphere.2023.138721
Graphene oxide chronic exposure enhanced perfluorooctane sulfonate mediated toxicity through oxidative stress generation in freshwater clam Corbicula fluminea	Bi C, Junaid M, Liu Y, Guo W, Jiang X, Pan B, Li Z, Xu N.	Chemosphere	10.1016/j.chemosphere.2022.134242
Grouping of PFAS for human health risk assessment: Findings from an independent panel of experts	Anderson JK, Brecher RW, Cousins IT, DeWitt J, Fiedler H, Kannan K, Kirman CR, Lipscomb J, Priestly B, Schoeny R, Seed J, Verner M, Hays SM.	Regulatory toxicology and pharmacology : RTP	10.1016/j.yrtph.2022.105226
Guidance on PFAS Exposure, Testing, and Clinical Follow-Up	National Academies of Sciences, Engineering, and Medicine; Health and Medicine Division; Division on Earth and Life Studies; Board on Population Health and Public Health Practice; Board on Environmental Studies and Toxicology; Committee on the Guidance on PFAS Testing and Health Outcomes.		10.17226/26156
Guided optimization of ToxPi model weights using a Semi-Automated approach	Fleming JF, House JS, Chappel JR, Motsinger-Reif AA, Reif DM.	Computational toxicology (Amsterdam, Netherlands)	10.1016/j.comtox.2023.100294
Gut Microbiome-Host Metabolome Homeostasis upon Exposure to PFOS and GenX in Male Mice	Rashid F, Dubinkina V, Ahmad S, Maslov S, Irudayaraj JMK.	Toxics	10.3390/toxics11030281
Hair determination of per- and polyfluoroalkyl substances (PFAS) in the Italian population	Piva E, Giorgetti A, Ioime P, Morini L, Freni F, Faro FL, Pirani F, Montisci M, Fais P, Pascali JP.	Toxicology	10.1016/j.tox.2021.152849
Harmonized human biomonitoring in European children, teenagers and adults: EU-wide exposure data of 11 chemical substance groups from the HBM4EU Aligned Studies (2014-2021)	Govarts E, Gilles L, Rodriguez Martin L, Santonen T, Apel P, Alvito P, Anastasi E, Andersen HR, Andersson AM, Andryskova L, Antignac JP, Appenzeller B, Barbone F, Barnett-Itzhaki Z, Barouki R, Berman T, Bil W, Borges T, Buekers J, Cañas-Portilla A, Covaci A, Csako Z, Den Hond E, Dvorakova D, Fabelova L, Fletcher T, Frederiksen H, Gabriel C, Ganzleben C, Göen T, Halldorsson TI, Haug LS, Horvat M, …	International journal of hygiene and environmental health	10.1016/j.ijheh.2023.114119
Harnessing electronic health records to study emerging environmental disasters: a proof of concept with perfluoroalkyl substances (PFAS)	Boland MR, Davidson LM, Canelón SP, Meeker J, Penning T, Holmes JH, Moore JH.	NPJ digital medicine	10.1038/s41746-021-00494-5
Harnessing Semi-Supervised Machine Learning to Automatically Predict Bioactivities of Per- and Polyfluoroalkyl Substances (PFASs)	Kwon H, Ali ZA, Wong BM.	Environmental science & technology letters	10.1021/acs.estlett.2c00530
Hazard screening of contaminants of emerging concern (CECs) in Sweden's three largest lakes and their associated rivers	Malnes D, Waara S, Figuière R, Ahrens L, Wiberg K, Köhler SJ, Golovko O.	Journal of hazardous materials	10.1016/j.jhazmat.2023.131376
Health impacts of artificial turf: Toxicity studies, challenges, and future directions	Murphy M, Warner GR.	Environmental pollution (Barking, Essex : 1987)	10.1016/j.envpol.2022.119841
Health Risk Exposure Assessment of Migration of Perfluorooctane Sulfonate and Perfluorooctanoic Acid from Paper and Cardboard in Contact with Food under Temperature Variations	You SH, Yu CC.	Foods (Basel, Switzerland)	10.3390/foods12091764
Health-related toxicity of emerging per- and polyfluoroalkyl substances: Comparison to legacy PFOS and PFOA	Jane L Espartero L, Yamada M, Ford J, Owens G, Prow T, Juhasz A.	Environmental research	10.1016/j.envres.2022.113431
Hepatic and ovarian effects of perfluorooctanoic acid exposure differ in lean and obese adult female mice	González-Alvarez ME, Keating AF.	Toxicology and applied pharmacology	10.1016/j.taap.2023.116614
Hepatic carboxylesterases are differentially regulated in PPARα-null mice treated with perfluorooctanoic acid	Wen X, Baker AA, Klaassen CD, Corton JC, Richardson JR, Aleksunes LM.	Toxicology	10.1016/j.tox.2019.01.014
Hepatic Fatty Acid Profiles Associated with Exposure to Emerging and Legacy Halogenated Contaminants in Two Harbor Seal Populations across the North Atlantic	Sun J, Zhang L, Zhou F, Shaw S, Roos A, Berger M, Bäcklin BM, Huang Y, Zheng X, Wang X, Chen D.	Environmental science & technology	10.1021/acs.est.1c06512
Hepatic Transcriptome Comparative In Silico Analysis Reveals Similar Pathways and Targets Altered by Legacy and Alternative Per- and Polyfluoroalkyl Substances in Mice	Robarts DR, Dai J, Lau C, Apte U, Corton JC.	Toxics	10.3390/toxics11120963
Hepatoprotective benefits of vitamin C against perfluorooctane sulfonate-induced liver damage in mice through suppressing inflammatory reaction and ER stress	Su M, Liang X, Xu X, Wu X, Yang B.	Environmental toxicology and pharmacology	10.1016/j.etap.2018.12.004
Hepatotoxic response of perfluorooctane sulfonamide (PFOSA) in early life stage zebrafish (Danio rerio) is greater than perfluorooctane sulfonate (PFOS)	Xuan R, Qiu X, Wang J, Liu S, Magnuson JT, Xu B, Qiu W, Zheng C.	Journal of hazardous materials	10.1016/j.jhazmat.2023.132552
Hepatotoxicity of perfluorooctanoic acid and two emerging alternatives based on a 3D spheroid model	Sun S, Guo H, Wang J, Dai J.	Environmental pollution (Barking, Essex : 1987)	10.1016/j.envpol.2018.12.065
Hexafluoropropylene oxide dimer acid (HFPO-DA) induced developmental cardiotoxicity and hepatotoxicity in hatchling chickens: Roles of peroxisome proliferator activated receptor alpha	Xu X, Ni H, Guo Y, Lin Y, Ji J, Jin C, Yuan F, Feng M, Ji N, Zheng Y, Jiang Q.	Environmental pollution (Barking, Essex : 1987)	10.1016/j.envpol.2021.118112
Hexafluoropropylene oxide trimer acid (HFPO-TA) disturbs embryonic liver and biliary system development in zebrafish	Sun S, Li X, Zhang L, Zhong Z, Chen C, Zuo Y, Chen Y, Hu H, Liu F, Xiong G, Lu H, Chen J, Dai J.	The Science of the total environment	10.1016/j.scitotenv.2022.160087
Hexafluoropropylene oxide trimer acid, a perfluorooctanoic acid alternative, induces cardiovascular toxicity in zebrafish embryos	Sun S, Zhang L, Li X, Zang L, Huang L, Zeng J, Cao Z, Liao X, Zhong Z, Lu H, Chen J.	Journal of environmental sciences (China)	10.1016/j.jes.2023.05.009
Hexafluoropropylene oxide-dimer acid (HFPO-DA or GenX) alters maternal and fetal glucose and lipid metabolism and produces neonatal mortality, low birthweight, and hepatomegaly in the Sprague-Dawley rat	Conley JM, Lambright CS, Evans N, McCord J, Strynar MJ, Hill D, Medlock-Kakaley E, Wilson VS, Gray LE Jr.	Environment international	10.1016/j.envint.2020.106204
High in Utero Exposure to Perfluoroalkyl Substances from Drinking Water and Birth Weight: A Cohort Study among Infants in Ronneby, Sweden	Engström K, Axmon A, Nielsen C, Rignell-Hydbom A.	International journal of environmental research and public health	10.3390/ijerph19042385
High resolution mass spectrometric suspect screening, wide-scope target analysis of emerging contaminants and determination of legacy pollutants in adult black-tailed godwit Limosa limosa limosa in the Netherlands - A pilot study	Movalli P, Biesmeijer K, Gkotsis G, Alygizakis N, Nika MC, Vasilatos K, Kostakis M, Thomaidis NS, Oswald P, Oswaldova M, Slobodnik J, Glowacka N, Hooijmeijer JCEW, Howison RA, Dekker RWRJ, van den Brink N, Piersma T.	Chemosphere	10.1016/j.chemosphere.2023.138145
High-content analysis shows synergistic effects of low perfluorooctanoic acid (PFOS) and perfluorooctane sulfonic acid (PFOA) mixture concentrations on human breast epithelial cell carcinogenesis	Pierozan P, Kosnik M, Karlsson O.	Environment international	10.1016/j.envint.2023.107746
High-content screening in zebrafish identifies perfluorooctanesulfonamide as a potent developmental toxicant	Dasgupta S, Reddam A, Liu Z, Liu J, Volz DC.	Environmental pollution (Barking, Essex : 1987)	10.1016/j.envpol.2019.113550
Higher free thyroxine associated with PFAS exposure in first trimester. The Odense Child Cohort	Jensen RC, Glintborg D, Timmermann CAG, Nielsen F, Boye H, Madsen JB, Bilenberg N, Grandjean P, Jensen TK, Andersen MS.	Environmental research	10.1016/j.envres.2022.113492
Higher plasma oxidative damage and lower plasma antioxidant defences in an Arctic seabird exposed to longer perfluoroalkyl acids	Costantini D, Blévin P, Herzke D, Moe B, Gabrielsen GW, Bustnes JO, Chastel O.	Environmental research	10.1016/j.envres.2018.10.003
High-throughput screening and chemotype-enrichment analysis of ToxCast phase II chemicals evaluated for human sodium-iodide symporter (NIS) inhibition	Wang J, Hallinger DR, Murr AS, Buckalew AR, Lougee RR, Richard AM, Laws SC, Stoker TE.	Environment international	10.1016/j.envint.2019.02.024
High-Throughput Screening of ToxCast PFAS Chemical Library for Potential Inhibitors of the Human Sodium Iodide Symporter	Stoker TE, Wang J, Murr AS, Bailey JR, Buckalew AR.	Chemical research in toxicology	10.1021/acs.chemrestox.2c00339
High-Throughput Transcriptomic Analysis of Human Primary Hepatocyte Spheroids Exposed to Per- and Polyfluoroalkyl Substances as a Platform for Relative Potency Characterization	Rowan-Carroll A, Reardon A, Leingartner K, Gagné R, Williams A, Meier MJ, Kuo B, Bourdon-Lacombe J, Moffat I, Carrier R, Nong A, Lorusso L, Ferguson SS, Atlas E, Yauk C.	Toxicological sciences : an official journal of the Society of Toxicology	10.1093/toxsci/kfab039
Hippocampal Proteomics Reveals the Role of Glutamatergic Synapse Activation in the Depression Induced by Perfluorooctane Sulfonate	An Z, Yang J, Xiao F, Lv J, Xing X, Liu H, Wang L, Liu Y, Zhang Z, Guo H.	Journal of agricultural and food chemistry	10.1021/acs.jafc.3c01344
Historical Trend of Exposure to Perfluoroalkyl Surfactants PFOA, ADV, and cC6O4 and its Management in Two Perfluoroalkyl Polymers Plants, Italy	Fustinoni S, Consonni D.	Annals of work exposures and health	10.1093/annweh/wxac095
Hormesis and bone marrow stem cells: Enhancing cell proliferation, differentiation and resilience to inflammatory stress	Calabrese EJ.	Chemico-biological interactions	10.1016/j.cbi.2021.109730
How do different arsenic species affect the joint toxicity of perfluorooctanoic acid and arsenic to earthworm Eisenia fetida: A multi-biomarker approach	Wang Z, Xue W, Qi F, Zhang Z, Li C, Cao X, Cui X, Wang N, Cui Z.	Ecotoxicology and environmental safety	10.1016/j.ecoenv.2023.114528
How the Structure of Per- and Polyfluoroalkyl Substances (PFAS) Influences Their Binding Potency to the Peroxisome Proliferator-Activated and Thyroid Hormone Receptors-An In Silico Screening Study	Kowalska D, Sosnowska A, Bulawska N, Stępnik M, Besselink H, Behnisch P, Puzyn T.	Molecules (Basel, Switzerland)	10.3390/molecules28020479
How to destroy 'forever chemicals': cheap method breaks down PFAS	Guglielmi G.	Nature	10.1038/d41586-022-02247-0
How to investigate human health effects related to exposure to mixtures of per- and polyfluoroalkyl substances: A systematic review of statistical methods	Rosato I, Zare Jeddi M, Ledda C, Gallo E, Fletcher T, Pitter G, Batzella E, Canova C.	Environmental research	10.1016/j.envres.2021.112565
Human Biomonitoring (HBM)-I values for perfluorooctanoic acid (PFOA) and perfluorooctane sulfonic acid (PFOS) - Description, derivation and discussion	Hölzer J, Lilienthal H, Schümann M.	Regulatory toxicology and pharmacology : RTP	10.1016/j.yrtph.2021.104862
Human biomonitoring (HBM)-II values for perfluorooctanoic acid (PFOA) and perfluorooctane sulfonic acid (PFOS) - Description, derivation and discussion	Schümann M, Lilienthal H, Hölzer J.	Regulatory toxicology and pharmacology : RTP	10.1016/j.yrtph.2021.104868
Human Evidence of Perfluorooctanoic Acid (PFOA) Exposure on Hepatic Disease: A Systematic Review and Meta-Analysis	Choi J, Kim JY, Lee HJ.	International journal of environmental research and public health	10.3390/ijerph191811318
Human exposure pathways to poly- and perfluoroalkyl substances (PFAS) from indoor media: A systematic review	DeLuca NM, Minucci JM, Mullikin A, Slover R, Cohen Hubal EA.	Environment international	10.1016/j.envint.2022.107149
Human exposure pathways to poly- and perfluoroalkyl substances (PFAS) from indoor media: A systematic review protocol	DeLuca NM, Angrish M, Wilkins A, Thayer K, Cohen Hubal EA.	Environment international	10.1016/j.envint.2020.106308
Human exposure to F-53B in China and the evaluation of its potential toxicity: An overview	He Y, Lv D, Li C, Liu X, Liu W, Han W.	Environment international	10.1016/j.envint.2022.107108
Human exposure to per- and polyfluoroalkyl substances (PFAS) through drinking water: A review of the recent scientific literature	Domingo JL, Nadal M.	Environmental research	10.1016/j.envres.2019.108648
Human Health and Ocean Pollution	Landrigan PJ, Stegeman JJ, Fleming LE, Allemand D, Anderson DM, Backer LC, Brucker-Davis F, Chevalier N, Corra L, Czerucka D, Bottein MD, Demeneix B, Depledge M, Deheyn DD, Dorman CJ, Fénichel P, Fisher S, Gaill F, Galgani F, Gaze WH, Giuliano L, Grandjean P, Hahn ME, Hamdoun A, Hess P, Judson B, Laborde A, McGlade J, Mu J, Mustapha A, Neira M, Noble RT, Pedrotti ML, Reddy C, Rocklöv J, Scharler …	Annals of global health	10.5334/aogh.2831
Human risk associated with exposure to mixtures of antiandrogenic chemicals evaluated using in vitro hazard and human biomonitoring data	Ma Y, Taxvig C, Rodríguez-Carrillo A, Mustieles V, Reiber L, Kiesow A, Löbl NM, Fernández MF, Hansen TVA, Valente MJ, Kolossa-Gehring M, David M, Vinggaard AM.	Environment international	10.1016/j.envint.2023.107815
Hydrolytically Stable Ionic Fluorogels for High-Performance Remediation of Per- and Polyfluoroalkyl Substances (PFAS) from Natural Water	Manning IM, Guan Pin Chew N, Macdonald HP, Miller KE, Strynar MJ, Coronell O, Leibfarth FA.	Angewandte Chemie (International ed. in English)	10.1002/anie.202208150
Icariin attenuates perfluorooctane sulfonate-induced testicular toxicity by alleviating Sertoli cell injury and downregulating the p38MAPK/MMP9 pathway	Zhang Y, Wu X, Zhu K, Liu S, Yang Y, Yuan D, Wang T, He Y, Dun Y, Wu J, Zhang C, Zhao H.	Food & function	10.1039/d1fo04135e
Ideal versus Nonideal Transport of PFAS in Unsaturated Porous Media	Brusseau ML, Guo B, Huang D, Yan N, Lyu Y.	Water research	10.1016/j.watres.2021.117405
Identification and classification of commercially relevant per- and poly-fluoroalkyl substances (PFAS)	Buck RC, Korzeniowski SH, Laganis E, Adamsky F.	Integrated environmental assessment and management	10.1002/ieam.4450
Identification of an Analytical Method Interference for Perfluorobutanoic Acid in Biological Samples	Bangma JT, Reiner J, Fry RC, Manuck T, McCord J, Strynar MJ.	Environmental science & technology letters	10.1021/acs.estlett.1c00901
Identification of Branched and Linear Forms of PFOA and Potential Precursors: A User-Friendly SMILES Structure-based Approach	Richard AM, Hidle H, Patlewicz G, Williams AJ.	Frontiers in environmental science	10.3389/fenvs.2022.865488
Identification of key features relating to the coexistence mechanisms of trace elements and per- and polyfluoroalkyl substances (PFASs) in marine mammals	Liu Y, Wang Q, Ma L, Jin L, Zhang K, Tao D, Wang WX, Lam PKS, Ruan Y.	Environment international	10.1016/j.envint.2023.108099
Identification of molecular initiating events and key events leading to endocrine disrupting effects of PFOA: Integrated molecular dynamic, transcriptomic, and proteomic analyses	Guan R, Luan F, Li N, Qiu Z, Liu W, Cui Z, Zhao C, Li X.	Chemosphere	10.1016/j.chemosphere.2022.135881
Identifying and Managing Aqueous Film-Forming Foam-Derived Per- and Polyfluoroalkyl Substances in the Environment	Leeson A, Thompson T, Stroo HF, Anderson RH, Speicher J, Mills MA, Willey J, Coyle C, Ghosh R, Lebrón C, Patton C.	Environmental toxicology and chemistry	10.1002/etc.4894
Identifying environmental factors that influence immune response to SARS-CoV-2: Systematic evidence map protocol	Rayasam SDG, Aung MT, Cooper C, Kwiatkowski C, Germolec DR, Rooney AA, Walker VR, Forte C, Woodruff TJ, Chartres N.	Environment international	10.1016/j.envint.2022.107230
Identifying Human Specific Adverse Outcome Pathways of Per- and Polyfluoroalkyl Substances Using Liver-Chimeric Humanized Mice	Robarts DR, Paine-Cabrera D, Kotulkar M, Venneman KK, Gunewardena S, Corton JC, Lau C, Foquet L, Bial G, Apte U.		10.1101/2023.02.01.526711
Identifying priority PBT-like compounds from emerging PFAS by nontargeted analysis and machine learning models	Han BC, Liu JS, Bizimana A, Zhang BX, Kateryna S, Zhao Z, Yu LP, Shen ZZ, Meng XZ.	Environmental pollution (Barking, Essex : 1987)	10.1016/j.envpol.2023.122663
Identifying Risk Factors for Levels of Per- and Polyfluoroalkyl Substances (PFAS) in the Placenta in a High-Risk Pregnancy Cohort in North Carolina	Bangma J, Eaves LA, Oldenburg K, Reiner JL, Manuck T, Fry RC.	Environmental science & technology	10.1021/acs.est.9b07102
Identifying the link between chemical exposures and breast cancer in African American women via integrated in vitro and exposure biomarker data	Polemi KM, Nguyen VK, Heidt J, Kahana A, Jolliet O, Colacino JA.	Toxicology	10.1016/j.tox.2021.152964
Immune response to COVID-19 vaccination in a population with a history of elevated exposure to per- and polyfluoroalkyl substances (PFAS) through drinking water	Bailey JM, Wang L, McDonald JM, Gray JS, Petrie JG, Martin ET, Savitz DA, Karrer TA, Fisher KA, Geiger MJ, Wasilevich EA.	Journal of exposure science & environmental epidemiology	10.1038/s41370-023-00564-8
Immunometabolism-modulation and immunotoxicity evaluation of perfluorooctanoic acid in macrophage	Tian J, Hong Y, Li Z, Yang Z, Lei B, Liu J, Cai Z.	Ecotoxicology and environmental safety	10.1016/j.ecoenv.2021.112128
Immunomodulation and exposure to per- and polyfluoroalkyl substances: an overview of the current evidence from animal and human studies	Antoniou E, Colnot T, Zeegers M, Dekant W.	Archives of toxicology	10.1007/s00204-022-03303-4
Immunotoxicity and allergenic potential induced by topical application of perfluorooctanoic acid (PFOA) in a murine model	Shane HL, Baur R, Lukomska E, Weatherly L, Anderson SE.	Food and chemical toxicology : an international journal published for the British Industrial Biological Research Association	10.1016/j.fct.2020.111114
Immunotoxicity and Transcriptome Analyses of Zebrafish (Danio rerio) Embryos Exposed to 6:2 FTSA	Zhang J, Ren Z, Chen M.	Toxics	10.3390/toxics11050459
Immunotoxicity mechanisms of perfluorinated compounds PFOA and PFOS	Liang L, Pan Y, Bin L, Liu Y, Huang W, Li R, Lai KP.	Chemosphere	10.1016/j.chemosphere.2021.132892
Immunotoxicity of an Electrochemically Fluorinated Aqueous Film-Forming Foam	McDonough CA, Ward C, Hu Q, Vance S, Higgins CP, DeWitt JC.	Toxicological sciences : an official journal of the Society of Toxicology	10.1093/toxsci/kfaa138
Immunotoxicity of F53B, an alternative to PFOS, on zebrafish (Danio rerio) at different early life stages	Liu S, Lai H, Wang Q, Martínez R, Zhang M, Liu Y, Huang J, Deng M, Tu W.	The Science of the total environment	10.1016/j.scitotenv.2021.148165
Immunotoxicity of Per- and Polyfluoroalkyl Substances: Insights into Short-Chain PFAS Exposure	Woodlief T, Vance S, Hu Q, DeWitt J.	Toxics	10.3390/toxics9050100
Immunotoxicity of Perfluorooctanoic Acid to the Marine Bivalve Species Ruditapes philippinarum	Li F, Liu Z, Yao L, Jiang Y, Qu M, Yu Y, Gong X, Tan Z, Li Z.	Environmental toxicology and chemistry	10.1002/etc.5263
Immunotoxicological effects of perfluorooctanesulfonic acid on European seabass are reduced by polyethylene microplastics	Espinosa-Ruiz C, González-Fernández C, Cormier B, Keiter SH, Vieira LR, Guilhermino L, Clérandeau C, Cachot J, Esteban MA, Cuesta A.	Fish & shellfish immunology	10.1016/j.fsi.2023.108793
Impact of a hexafluoropropylene oxide trimer acid (HFPO-TA) exposure on impairing the gut microbiota in mice	Hu L, Sun L, Zhou J, Wu F, Fu Z, Xie X.	Chemosphere	10.1016/j.chemosphere.2022.134951
Impact of a Hydrocarbon Surfactant on the Retention and Transport of Perfluorooctanoic Acid in Saturated and Unsaturated Porous Media	Ji Y, Yan N, Brusseau ML, Guo B, Zheng X, Dai M, Liu H, Li X.	Environmental science & technology	10.1021/acs.est.1c01919
Impact of Contaminants on Microbiota: Linking the Gut-Brain Axis with Neurotoxicity	Balaguer-Trias J, Deepika D, Schuhmacher M, Kumar V.	International journal of environmental research and public health	10.3390/ijerph19031368
Impact of exposure to per- and polyfluoroalkyl substances on fecal microbiota composition in mother-infant dyads	Lamichhane S, Härkönen T, Vatanen T, Hyötyläinen T, Knip M, Orešič M.	Environment international	10.1016/j.envint.2023.107965
Impact of Firefighting Aqueous Film-Forming Foams on Human Cell Proliferation and Cellular Mortality	Kafkoutsou AL, Yang YP, Zeynaloo E, Deo SK, Solle NS, Kobetz EN, Daunert S, Caban-Martinez AJ.	Journal of occupational and environmental medicine	10.1097/JOM.0000000000002527
Impact of Hurricane Maria on Drinking Water Quality in Puerto Rico	Lin Y, Sevillano-Rivera M, Jiang T, Li G, Cotto I, Vosloo S, Carpenter CMG, Larese-Casanova P, Giese RW, Helbling DE, Padilla IY, Rosario-Pabón Z, Vélez Vega C, Cordero JF, Alshawabkeh AN, Pinto A, Gu AZ.	Environmental science & technology	10.1021/acs.est.0c01655
Impact of matrix diffusion on the migration of groundwater plumes for Perfluoroalkyl acids (PFAAs) and other non-degradable compounds	Farhat SK, Newell CJ, Lee SA, Looney BB, Falta RW.	Journal of contaminant hydrology	10.1016/j.jconhyd.2022.103987
Impact of perfluoroalkyl substances (PFAS) and PFAS mixtures on lipid metabolism in differentiated HepaRG cells as a model for human hepatocytes	Sadrabadi F, Alarcan J, Sprenger H, Braeuning A, Buhrke T.	Archives of toxicology	10.1007/s00204-023-03649-3
Impact of perfluorooctanoic acid (PFOA) and perfluorooctane sulfonic acid (PFOS) on secondary sludge microorganisms: removal, potential toxicity, and their implications on existing wastewater treatment regulations in Canada	Ilieva Z, Hania P, Suehring R, Gilbride K, Hamza R.	Environmental science. Processes & impacts	10.1039/d3em00202k
Impact of PFAS exposure on prevalence of immune-mediated diseases in adults in the Czech Republic	Rudzanova B, Vlaanderen J, Kalina J, Piler P, Zvonar M, Klanova J, Blaha L, Adamovsky O.	Environmental research	10.1016/j.envres.2023.115969
Impact of phosphate addition on PFAS treatment performance for drinking water	Haupert LM, Redding A, Gray JM, Civardi J, Datsov B, Sanan TT, Mills MA, Speth TF, Burkhardt JB.	AWWA water science	10.1002/aws2.1361
Impacts of PFOA(C8), GenX(C6), and their mixtures on zebrafish developmental toxicity and gene expression provide insight about tumor-related disease	Liu H, Chen Y, Hu W, Luo Y, Zhu P, You S, Li Y, Jiang Z, Wu X, Li X.	The Science of the total environment	10.1016/j.scitotenv.2022.160085
Impacts of Sex and Exposure Duration on Gene Expression in Zebrafish Following Perfluorooctane Sulfonate Exposure	Khazaee M, Guardian MGE, Aga DS, Ng CA.	Environmental toxicology and chemistry	10.1002/etc.4628
Impaired gross motor development in infants with higher PFAS concentrations	Varsi K, Torsvik IK, Huber S, Averina M, Brox J, Bjørke-Monsen AL.	Environmental research	10.1016/j.envres.2021.112392
Impairment of bile acid metabolism by perfluorooctanoic acid (PFOA) and perfluorooctanesulfonic acid (PFOS) in human HepaRG hepatoma cells	Behr AC, Kwiatkowski A, Ståhlman M, Schmidt FF, Luckert C, Braeuning A, Buhrke T.	Archives of toxicology	10.1007/s00204-020-02732-3
Impairment of human dopaminergic neurons at different developmental stages by perfluoro-octanoic acid (PFOA) and differential human brain areas accumulation of perfluoroalkyl chemicals	Di Nisio A, Pannella M, Vogiatzis S, Sut S, Dall'Acqua S, Rocca MS, Antonini A, Porzionato A, De Caro R, Bortolozzi M, Toni L, Foresta C.	Environment international	10.1016/j.envint.2021.106982
Implementation of Zebrafish Ontologies for Toxicology Screening	Thessen AE, Marvel S, Achenbach JC, Fischer S, Haendel MA, Hayward K, Klüver N, Könemann S, Legradi J, Lein P, Leong C, Mylroie JE, Padilla S, Perone D, Planchart A, Prieto RM, Muriana A, Quevedo C, Reif D, Ryan K, Stinckens E, Truong L, Vergauwen L, Vom Berg C, Wilbanks M, Yaghoobi B, Hamm J.	Frontiers in toxicology	10.3389/ftox.2022.817999
Implementing the EU Chemicals Strategy for Sustainability: The case of food contact chemicals of concern	Zimmermann L, Scheringer M, Geueke B, Boucher JM, Parkinson LV, Groh KJ, Muncke J.	Journal of hazardous materials	10.1016/j.jhazmat.2022.129167
Implications of PFAS definitions using fluorinated pharmaceuticals	Hammel E, Webster TF, Gurney R, Heiger-Bernays W.	iScience	10.1016/j.isci.2022.104020
Improved Tandem Mass Spectrometry Detection and Resolution of Low Molecular Weight Perfluoroalkyl Ether Carboxylic Acid Isomers	Miller KE, Strynar MJ.	Environmental science & technology letters	10.1021/acs.estlett.2c00509
Improvement of α-amylase to the metabolism adaptions of soil bacteria against PFOS exposure	Zheng T, Li J, Liu C.	Ecotoxicology and environmental safety	10.1016/j.ecoenv.2020.111770
In silico analysis decodes transthyretin (TTR) binding and thyroid disrupting effects of per- and polyfluoroalkyl substances (PFAS)	Dharpure R, Pramanik S, Pradhan A.	Archives of toxicology	10.1007/s00204-022-03434-8
In Situ Insight into the Availability and Desorption Kinetics of Per- and Polyfluoroalkyl Substances in Soils with Diffusive Gradients in Thin Films	Huang YR, Liu SS, Zi JX, Cheng SM, Li J, Ying GG, Chen CE.	Environmental science & technology	10.1021/acs.est.2c09348
In utero exposure to per-/polyfluoroalkyl substances (PFASs): Preeclampsia in pregnancy and low birth weight for neonates	Tian Y, Zhou Q, Zhang L, Li W, Yin S, Li F, Xu C.	Chemosphere	10.1016/j.chemosphere.2022.137490
In utero exposure to perfluoroalkyl and polyfluoroalkyl substances and attention and executive function in the offspring: A study in the Danish National Birth Cohort	Bach CC, Liew Z, Matthiesen NB, Henriksen TB, Bech BH, Nøhr EA, Bonefeld-Jørgensen EC, Olsen J.	Environmental research	10.1016/j.envres.2022.113262
In utero exposure to perfluoroalkyl substances and early childhood BMI trajectories: A mediation analysis with neonatal metabolic profiles	Zeng X, Chen T, Cui Y, Zhao J, Chen Q, Yu Z, Zhang Y, Han L, Chen Y, Zhang J; Shanghai Birth Cohort Study.	The Science of the total environment	10.1016/j.scitotenv.2023.161504
In utero exposure to poly- and perfluoroalkyl substances (PFASs) and subsequent breast cancer	Cohn BA, La Merrill MA, Krigbaum NY, Wang M, Park JS, Petreas M, Yeh G, Hovey RC, Zimmermann L, Cirillo PM.	Reproductive toxicology (Elmsford, N.Y.)	10.1016/j.reprotox.2019.06.012
In utero exposure to poly- and perfluoroalkyl substances and children respiratory health in the three first years of life	Philippat C, Coiffier O, Lyon-Caen S, Boudier A, Jovanovic N, Quentin J, Gioria Y, Haug LS, Thomsen C, Bayat S, Slama R, Siroux V.	Environmental research	10.1016/j.envres.2023.116544
In vitro activity of a panel of per- and polyfluoroalkyl substances (PFAS), fatty acids, and pharmaceuticals in peroxisome proliferator-activated receptor (PPAR) alpha, PPAR gamma, and estrogen receptor assays	Evans N, Conley JM, Cardon M, Hartig P, Medlock-Kakaley E, Gray LE Jr.	Toxicology and applied pharmacology	10.1016/j.taap.2022.116136
In Vitro and In Silico Evaluations of Binding Affinities of Perfluoroalkyl Substances to Baikal Seal and Human Peroxisome Proliferator-Activated Receptor α	Ishibashi H, Hirano M, Kim EY, Iwata H.	Environmental science & technology	10.1021/acs.est.8b07273
In Vitro Assays to Identify Metabolism-Disrupting Chemicals with Diabetogenic Activity in a Human Pancreatic β-Cell Model	Dos Santos RS, Medina-Gali RM, Babiloni-Chust I, Marroqui L, Nadal A.	International journal of molecular sciences	10.3390/ijms23095040
In vitro binding analysis of legacy-linear and new generation-cyclic perfluoro-alkyl substances on sex hormone binding globulin and albumin, suggests low impact on serum hormone kinetics of testosterone	Pavan A, Cendron L, Di Nisio A, Pedrucci F, Sabovic I, Scarso A, Ferlin A, Angelini A, Foresta C, De Toni L.	Toxicology	10.1016/j.tox.2023.153664
In vitro human cell-based TTR-TRβ CALUX assay indicates thyroid hormone transport disruption of short-chain, medium-chain, and long-chain chlorinated paraffins	Sprengel J, Behnisch PA, Besselink H, Brouwer A, Vetter W.	Archives of toxicology	10.1007/s00204-021-02994-5
In vitro modeling of the post-ingestion bioaccessibility of per- and polyfluoroalkyl substances sorbed to soil and house dust	Parker BA, Valentini E, Graham SE, Starr JM.	Toxicological sciences : an official journal of the Society of Toxicology	10.1093/toxsci/kfad098
In vitro screening of per- and polyfluorinated substances (PFAS) for interference with seven thyroid hormone system targets across nine assays	Degitz SJ, Olker JH, Denny JS, Degoey PP, Hartig PC, Cardon MC, Eytcheson SA, Haselman JT, Mayasich SA, Hornung MW.	Toxicology in vitro : an international journal published in association with BIBRA	10.1016/j.tiv.2023.105762
In vitro and in silico modeling of perfluoroalkyl substances mixture toxicity in an amphibian fibroblast cell line	Hoover G, Kar S, Guffey S, Leszczynski J, Sepúlveda MS.	Chemosphere	10.1016/j.chemosphere.2019.05.065
Incidence of ocular conditions associated with perfluoroalkyl substances exposure: Isomers of C8 Health Project in China	Zeeshan M, Yang Y, Zhou Y, Huang W, Wang Z, Zeng XY, Liu RQ, Yang BY, Hu LW, Zeng XW, Sun X, Yu Y, Dong GH.	Environment international	10.1016/j.envint.2020.105555
Increased apoptosis, reduced Wnt/β-catenin signaling, and altered tail development in zebrafish embryos exposed to a human-relevant chemical mixture	Smirnova A, Mentor A, Ranefall P, Bornehag CG, Brunström B, Mattsson A, Jönsson M.	Chemosphere	10.1016/j.chemosphere.2020.128467
Increased Cardiovascular Risk Associated with Chemical Sensitivity to Perfluoro-Octanoic Acid: Role of Impaired Platelet Aggregation	De Toni L, Radu CM, Sabovic I, Di Nisio A, Dall'Acqua S, Guidolin D, Spampinato S, Campello E, Simioni P, Foresta C.	International journal of molecular sciences	10.3390/ijms21020399
Increased levels of perfluorooctanesulfonic acid (PFOS) during Hurricane Dorian on the east coast of Florida	Martinez B, Da Silva BF, Aristizabal-Henao JJ, Denslow ND, Osborne TZ, Morrison ES, Bianchi TS, Bowden JA.	Environmental research	10.1016/j.envres.2021.112635
Increased toxicity and retention of perflourooctane sulfonate (PFOS) in humanized CYP2B6-Transgenic mice compared to Cyp2b-null mice is relieved by a high-fat diet (HFD)	Hamilton MC, Heintz MM, Pfohl M, Marques E, Ford L, Slitt AL, Baldwin WS.	Food and chemical toxicology : an international journal published for the British Industrial Biological Research Association	10.1016/j.fct.2021.112175
Induction of aggression and anxiety-like responses by perfluorooctanoic acid is accompanied by modulation of cholinergic- and purinergic signaling-related parameters in adult zebrafish	Adedara IA, Souza TP, Canzian J, Olabiyi AA, Borba JV, Biasuz E, Sabadin GR, Gonçalves FL, Costa FV, Schetinger MRC, Farombi EO, Rosemberg DB.	Ecotoxicology and environmental safety	10.1016/j.ecoenv.2022.113635
Induction of hepatic miR-34a by perfluorooctanoic acid regulates metabolism-related genes in mice	Cui R, Li C, Wang J, Dai J.	Environmental pollution (Barking, Essex : 1987)	10.1016/j.envpol.2018.10.061
Inflammation and cardiometabolic diseases induced by persistent organic pollutants and nutritional interventions: Effects of multi-organ interactions	Wang Z, Zhou Y, Xiao X, Liu A, Wang S, Preston RJS, Zaytseva YY, He G, Xiao W, Hennig B, Deng P.	Environmental pollution (Barking, Essex : 1987)	10.1016/j.envpol.2023.122756
Inflammatory bowel disease and biomarkers of gut inflammation and permeability in a community with high exposure to perfluoroalkyl substances through drinking water	Xu Y, Li Y, Scott K, Lindh CH, Jakobsson K, Fletcher T, Ohlsson B, Andersson EM.	Environmental research	10.1016/j.envres.2019.108923
Influence of maternal endocrine disrupting chemicals exposure on adverse pregnancy outcomes: A systematic review and meta-analysis	Liu B, Lu X, Jiang A, Lv Y, Zhang H, Xu B.	Ecotoxicology and environmental safety	10.1016/j.ecoenv.2023.115851
Influence of perfluoroalkyl acids and other parameters on circulating thyroid hormones and immune-related microRNA expression in free-ranging nestling peregrine falcons	Sun J, Letcher RJ, Waugh CA, Jaspers VLB, Covaci A, Fernie KJ.	The Science of the total environment	10.1016/j.scitotenv.2021.145346
Influence of Residual Nonaqueous-Phase Liquids (NAPLs) on the Transport and Retention of Perfluoroalkyl Substances	Liao S, Arshadi M, Woodcock MJ, Saleeba ZSSL, Pinchbeck D, Liu C, Cápiro NL, Abriola LM, Pennell KD.	Environmental science & technology	10.1021/acs.est.2c00858
Influence of Water Resource Recovery Facility Effluents on the Presence of Selected Trace Organic Contaminants (TOrCs) in the Reedy River, South Carolina	Fahr DJ, Hinz FO, Reisinger AJ, Huddleston GM 3rd, Bisesi JH, Wilson PC.	Bulletin of environmental contamination and toxicology	10.1007/s00128-021-03365-7
Information Requirements under the Essential-Use Concept: PFAS Case Studies	Glüge J, London R, Cousins IT, DeWitt J, Goldenman G, Herzke D, Lohmann R, Miller M, Ng CA, Patton S, Trier X, Wang Z, Scheringer M.	Environmental science & technology	10.1021/acs.est.1c03732
Inhibition of human sulfotransferases (SULTs) by per- and polyfluoroalkyl substances (PFASs) and structure-activity relationship	Liu YZ, Yang K, Zhang W, Zhang Q, Liu TF, Xu T, Li Y, Ran RX, Yang K, Cao YF, Fang ZZ.	Food and chemical toxicology : an international journal published for the British Industrial Biological Research Association	10.1016/j.fct.2023.113664
Innovate beyond PFAS	Scheringer M.	Science (New York, N.Y.)	10.1126/science.adj7475
Insight into the binding model of per- and polyfluoroalkyl substances to proteins and membranes	Zhao L, Teng M, Zhao X, Li Y, Sun J, Zhao W, Ruan Y, Leung KMY, Wu F.	Environment international	10.1016/j.envint.2023.107951
Insight into the defluorination ability of per- and polyfluoroalkyl substances based on machine learning and quantum chemical computations	Cao H, Peng J, Zhou Z, Sun Y, Wang Y, Liang Y.	The Science of the total environment	10.1016/j.scitotenv.2021.151018
Insight into the mechanisms of neuroendocrine toxicity induced by 6:2FTCA via thyroid hormone disruption	Wu L, Gu J, Duan X, Ge F, Ye H, Kong L, Liu W, Gao R, Jiao J, Chen H, Ji G.	Chemosphere	10.1016/j.chemosphere.2023.140031
Insights from metabolomics and transcriptomics studies on Perfluorohexanesulfonic acid (PFHxS) exposed zebrafish embryos	Ulhaq ZS, Boncan DAT, Chan TF, Tse WKF.	The Science of the total environment	10.1016/j.scitotenv.2023.166833
Insights into the effects of salinity on the sorption and desorption of legacy and emerging per-and polyfluoroalkyl substances (PFASs) on marine sediments	Yin C, Pan CG, Xiao SK, Wu Q, Tan HM, Yu K.	Environmental pollution (Barking, Essex : 1987)	10.1016/j.envpol.2022.118957
Insights into the impacts of bioturbation by multiple benthic organisms on the bioavailability and toxic effects of perfluorooctane sulfonate in sediment	Wu Z, Li R, Zhang Y, Zhu L.	Journal of hazardous materials	10.1016/j.jhazmat.2021.126675
Insights into the mechanisms of organic pollutant toxicity to earthworms: Advances and perspectives	Zhao W, Teng M, Zhang J, Wang K, Zhang J, Xu Y, Wang C.	Environmental pollution (Barking, Essex : 1987)	10.1016/j.envpol.2022.119120
In-situ fabrication of a spherical-shaped Zn-Al hydrotalcite with BiOCl and study on its enhanced photocatalytic mechanism for perfluorooctanoic acid removal performed with a response surface methodology	Yang Y, Zheng Z, Yang M, Chen J, Li C, Zhang C, Zhang X.	Journal of hazardous materials	10.1016/j.jhazmat.2020.123070
Integrated analysis of physiological, transcriptomics and metabolomics provides insights into detoxication disruption of PFOA exposure in Mytilus edulis	Li F, Yu Y, Guo M, Lin Y, Jiang Y, Qu M, Sun X, Li Z, Zhai Y, Tan Z.	Ecotoxicology and environmental safety	10.1016/j.ecoenv.2021.112081
Integrated multi-omics analysis reveals the underlying molecular mechanism for developmental neurotoxicity of perfluorooctanesulfonic acid in zebrafish	Lee H, Sung EJ, Seo S, Min EK, Lee JY, Shim I, Kim P, Kim TY, Lee S, Kim KT.	Environment international	10.1016/j.envint.2021.106802
Integration of metabolomics and proteomics reveals the underlying hepatotoxic mechanism of perfluorooctane sulfonate (PFOS) and 6:2 chlorinated polyfluoroalkyl ether sulfonic acid (6:2 Cl-PFESA) in primary human hepatocytes	Li C, Jiang L, Qi Y, Zhang D, Liu X, Han W, Ma W, Xu L, Jin Y, Luo J, Zhao K, Yu D.	Ecotoxicology and environmental safety	10.1016/j.ecoenv.2022.114361
Integration of target, suspect, and nontarget screening with risk modeling for per- and polyfluoroalkyl substances prioritization in surface waters	Hu J, Lyu Y, Chen H, Cai L, Li J, Cao X, Sun W.	Water research	10.1016/j.watres.2023.119735
Integration of Toxicogenomics and Physiologically Based Pharmacokinetic Modeling in Human Health Risk Assessment of Perfluorooctane Sulfonate	Chen Q, Chou WC, Lin Z.	Environmental science & technology	10.1021/acs.est.1c06479
Integrative Computational Approaches to Inform Relative Bioaccumulation Potential of Per- and Polyfluoroalkyl Substances Across Species	Cheng W, Doering JA, LaLone C, Ng C.	Toxicological sciences : an official journal of the Society of Toxicology	10.1093/toxsci/kfab004
Integrative multi-omics reveals analogous developmental neurotoxicity mechanisms between perfluorobutanesulfonic acid and perfluorooctanesulfonic acid in zebrafish	Min EK, Lee H, Sung EJ, Seo SW, Song M, Wang S, Kim SS, Bae MA, Kim TY, Lee S, Kim KT.	Journal of hazardous materials	10.1016/j.jhazmat.2023.131714
Integrative omics analyses uncover the mechanism underlying the immunotoxicity of perfluorooctanesulfonate in human lymphocytes	Li R, Guo C, Lin X, Chan TF, Lai KP, Chen J.	Chemosphere	10.1016/j.chemosphere.2020.127062
Integrative omics analysis reveals the protective role of vitamin C on perfluorooctanoic acid-induced hepatoxicity	Li R, Guo C, Lin X, Chan TF, Su M, Zhang Z, Lai KP.	Journal of advanced research	10.1016/j.jare.2021.04.003
Interaction between environmental pollutants and cancer drug efficacy: Bisphenol A, Bisphenol A diglycidyl ether and Perfluorooctanoic acid reduce vincristine cytotoxicity in acute lymphoblastic leukemia cells	Lagunas-Rangel FA, Liu W, Schiöth HB.	Journal of applied toxicology : JAT	10.1002/jat.4398
Interaction between perfluorooctanoic acid and aerobic granular sludge	Yang G, Zhang N, Yang J, Fu Q, Wang Y, Wang D, Tang L, Xia J, Liu X, Li X, Yang Q, Liu Y, Wang Q, Ni BJ.	Water research	10.1016/j.watres.2019.115249
Interaction of Per- and Polyfluoroalkyl Substances and Allostatic Load among Adults in Various Occupations	Bashir T, Obeng-Gyasi E.	Diseases (Basel, Switzerland)	10.3390/diseases10020026
Interactions between Lemna minor (common duckweed) and PFAS intermediates: Perfluorooctanesulfonamide (PFOSA) and 6:2 fluorotelomer sulfonate (6:2 FTSA)	Zhang W, Liang Y.	Chemosphere	10.1016/j.chemosphere.2021.130165
Interactions of perfluorooctanoic acid with acyl-CoA thioesterase 1 (Acot1)	Liu H, Cheng J, Zhou Y, Liu F, Griffin N, Faulkner S, Wang L.	Comparative biochemistry and physiology. Toxicology & pharmacology : CBP	10.1016/j.cbpc.2021.109159
Internal exposure to perfluoroalkyl substances (PFAS) in vegans and omnivores	Menzel J, Abraham K, Dietrich S, Fromme H, Völkel W, Schwerdtle T, Weikert C.	International journal of hygiene and environmental health	10.1016/j.ijheh.2021.113808
Internal exposure to perfluoroalkyl substances (PFASs) and biological markers in 101 healthy 1-year-old children: associations between levels of perfluorooctanoic acid (PFOA) and vaccine response	Abraham K, Mielke H, Fromme H, Völkel W, Menzel J, Peiser M, Zepp F, Willich SN, Weikert C.	Archives of toxicology	10.1007/s00204-020-02715-4
Internal extractive electrospray ionization mass spectrometry for investigating the phospholipid dysregulation induced by perfluorooctanoic acid in Nile tilapia	Liu J, Lu H, Ning Y, Hua X, Pan W, Gu Y, Dong D, Liang D.	The Analyst	10.1039/d2an00820c
Internal relative potency factors based on immunotoxicity for the risk assessment of mixtures of per- and polyfluoroalkyl substances (PFAS) in human biomonitoring	Bil W, Ehrlich V, Chen G, Vandebriel R, Zeilmaker M, Luijten M, Uhl M, Marx-Stoelting P, Halldorsson TI, Bokkers B.	Environment international	10.1016/j.envint.2022.107727
Internal Relative Potency Factors for the Risk Assessment of Mixtures of Per- and Polyfluoroalkyl Substances (PFAS) in Human Biomonitoring	Bil W, Zeilmaker MJ, Bokkers BGH.	Environmental health perspectives	10.1289/EHP10009
Interspecies differences in perfluoroalkyl substances (PFAS) toxicokinetics and application to health-based criteria	Pizzurro DM, Seeley M, Kerper LE, Beck BD.	Regulatory toxicology and pharmacology : RTP	10.1016/j.yrtph.2019.05.008
Intestinal environmental disorders associate with the tissue damages induced by perfluorooctane sulfonate exposure	Wang G, Sun S, Wu X, Yang S, Wu Y, Zhao J, Zhang H, Chen W.	Ecotoxicology and environmental safety	10.1016/j.ecoenv.2020.110590
Intrauterine exposure to per- and polyfluoroalkyl substances may harm children's lung function development	Kung YP, Lin CC, Chen MH, Tsai MS, Hsieh WS, Chen PC.	Environmental research	10.1016/j.envres.2020.110178
Intrauterine exposure to perfluorinated compounds and overweight at age 4: A case-control study	Martinsson M, Nielsen C, Björk J, Rylander L, Malmqvist E, Lindh C, Rignell-Hydbom A.	PloS one	10.1371/journal.pone.0230137
Inulin alleviates perfluorooctanoic acid-induced intestinal injury in mice by modulating the PI3K/AKT/mTOR signaling pathway	Zhang QY, Zhong MT, Gi M, Chen YK, Lai MQ, Liu JY, Liu YM, Wang Q, Xie XL.	Environmental pollution (Barking, Essex : 1987)	10.1016/j.envpol.2023.123090
Investigating fatty liver disease-associated adverse outcome pathways of perfluorooctane sulfonate using a systems toxicology approach	Kim M, Kim SH, Choi JY, Park YJ.	Food and chemical toxicology : an international journal published for the British Industrial Biological Research Association	10.1016/j.fct.2023.113781
Investigating Molecular Mechanisms of Immunotoxicity and the Utility of ToxCast for Immunotoxicity Screening of Chemicals Added to Food	Naidenko OV, Andrews DQ, Temkin AM, Stoiber T, Uche UI, Evans S, Perrone-Gray S.	International journal of environmental research and public health	10.3390/ijerph18073332
Investigating the cytotoxic redox mechanism of PFOS within Hep G2 by hyperspectral-assisted scanning electrochemical microscopy	Goines S, Dick JE.	The Analyst	10.1039/d2an00904h
Investigating the cytotoxicity of per- and polyfluoroalkyl substances in HepG2 cells: A structure-activity relationship approach	Amstutz VH, Cengo A, Gehres F, Sijm DTHM, Vrolijk MF.	Toxicology	10.1016/j.tox.2022.153312
Investigating the Predictive Power of Three Potential Sublethal Endpoints for the Fathead Minnow Fish Embryo Toxicity Test: Snout-Vent Length, Eye Size, and Pericardial Edema	Krzykwa JC, King SM, Sellin Jeffries MK.	Environmental science & technology	10.1021/acs.est.1c00837
Investigating Three Classification Methods for Per/Poly-Fluoroalkyl Substance (PFAS) Exposure from Electronic Health Records And Potential for Bias	Davidson LM, Boland MR.	AMIA Joint Summits on Translational Science proceedings. AMIA Joint Summits on Translational Science
Investigation of the Binding Fraction of PFAS in Human Plasma and Underlying Mechanisms Based on Machine Learning and Molecular Dynamics Simulation	Cao H, Peng J, Zhou Z, Yang Z, Wang L, Sun Y, Wang Y, Liang Y.	Environmental science & technology	10.1021/acs.est.2c04400
Investigation of the Interaction Mechanism of Perfluoroalkyl Carboxylic Acids with Human Serum Albumin by Spectroscopic Methods	Chen H, Wang Q, Cai Y, Yuan R, Wang F, Zhou B.	International journal of environmental research and public health	10.3390/ijerph17041319
Investigations on the phytotoxicity of perfluorooctanoic acid in Arabidopsis thaliana	Fan L, Tang J, Zhang D, Ma M, Wang Y, Han Y.	Environmental science and pollution research international	10.1007/s11356-019-07018-5
Invited Perspective: Long-Term Effects of Gestational PFAS Exposures on Adiposity-Time for Solutions	Buckley JP, Braun JM.	Environmental health perspectives	10.1289/EHP13966
Invited Perspective: PFAS and Dyslipidemia-The Perimenopausal Period as a Critical Time Window	Chatzi L, Baumert BO.	Environmental health perspectives	10.1289/EHP13195
Invited Perspective: PFAS and Liver Disease: Bringing All the Evidence Together	Ducatman A, Fenton SE.	Environmental health perspectives	10.1289/EHP11149
Invited Perspective: PFAS and the Childhood Obesity Phenotype-Challenges and Opportunities	Stratakis N, Vrijheid M.	Environmental health perspectives	10.1289/EHP12713
Invited Perspective: PFAS Effects on Brain Development-Are Microglia the Missing Link?	Plunk EC, Majewska AK.	Environmental health perspectives	10.1289/EHP13845
Iron-activated persulfate oxidation degrades aqueous Perfluorooctanoic acid (PFOA) at ambient temperature	Tran T, Abrell L, Brusseau ML, Chorover J.	Chemosphere	10.1016/j.chemosphere.2021.130824
Is HFPO-DA (GenX) a suitable substitute for PFOA? A comprehensive degradation comparison of PFOA and GenX via electrooxidation	Yang LH, Yang WJ, Lv SH, Zhu TT, Adeel Sharif HM, Yang C, Du J, Lin H.	Environmental research	10.1016/j.envres.2021.111995
Is Mixtures' Additivity Supported by Empirical Data? A Case Study of Developmental Toxicity of PFOS and 6:2 FTS in Wildtype Zebrafish Embryos	Fey ME, Goodrum PE, Razavi NR, Whipps CM, Fernando S, Anderson JK.	Toxics	10.3390/toxics10080418
Is PFOA a renal carcinogen?	Fenner A.	Nature reviews. Urology	10.1038/s41585-020-00388-3
Issues in the hazard and risk assessment of perfluoroalkyl substance mixtures	Colnot T, Dekant W.	Toxicology letters	10.1016/j.toxlet.2021.10.005
iTRAQ-based quantitative proteomics analysis of Sprague-Dawley rats liver reveals perfluorooctanoic acid-induced lipid metabolism and urea cycle dysfunction	Liu H, Sun W, Zhou Y, Griffin N, Faulkner S, Wang L.	Toxicology letters	10.1016/j.toxlet.2021.12.016
Joint effects of CuO nanoparticles and perfluorooctanoic acid on cabbage (Brassica pekinensis L.)	Zhang J, Wang Q, Wang Y, Xu Y, Du W, Guo H.	Environmental science and pollution research international	10.1007/s11356-023-26862-0
Joint effects of per- and polyfluoroalkyl substance alternatives and heavy metals on renal health: A community-based population study in China	Liang LX, Dong P, Zhou Y, Zhang L, Qian Z, Geiger SD, Bingheim E, Tang X, Wu Y, Lv J, Lin LZ, Zeeshan M, Zeng XW, Feng W, Dong GH.	Environmental research	10.1016/j.envres.2022.115057
Joint toxicity mechanisms of binary emerging PFAS mixture on algae (Chlorella pyrenoidosa) at environmental concentration	Liu X, Zheng X, Zhang L, Li J, Li Y, Huang H, Fan Z.	Journal of hazardous materials	10.1016/j.jhazmat.2022.129355
Joint toxicity mechanisms of perfluorooctanoic acid and sulfadiazine on submerged macrophytes and periphytic biofilms	Zhang W, Li Q, Yang Y, Yu Y, Li S, Liu J, Xiao Y, Wen Y, Wang Q, Lei N, Gu P.	Journal of hazardous materials	10.1016/j.jhazmat.2023.131910
Key Considerations for Accurate Exposures in Ecotoxicological Assessments of Perfluorinated Carboxylates and Sulfonates	Rewerts JN, Christie EC, Robel AE, Anderson TA, McCarthy C, Salice CJ, Field JA.	Environmental toxicology and chemistry	10.1002/etc.4667
Kinetics and toxicity of an environmentally relevant mixture of halogenated organic compounds in zebrafish embryo	Lindqvist D, Wincent E.	Aquatic toxicology (Amsterdam, Netherlands)	10.1016/j.aquatox.2022.106311
Kinetics of Excretion of the Perfluoroalkyl Surfactant cC(6)O(4) in Humans	Fustinoni S, Mercadante R, Lainati G, Cafagna S, Consonni D.	Toxics	10.3390/toxics11030284
Lack of interaction of the fluorosurfactant C6O4 with human renal transporters: In vitro/in silico analysis	Bruno S, Bersani M, Astore S, Chiabotto G, Barge A, Binello A, Spyrakis F.	Toxicology	10.1016/j.tox.2022.153257
Lactic acid bacteria alleviate liver damage caused by perfluorooctanoic acid exposure via antioxidant capacity, biosorption capacity and gut microbiota regulation	Shi L, Pan R, Lin G, Liang X, Zhao J, Zhang H, Chen W, Wang G.	Ecotoxicology and environmental safety	10.1016/j.ecoenv.2021.112515
Large-scale assessment of exposure to legacy and emerging per- and polyfluoroalkyl substances in China's shorebirds	Sun J, Cheng Y, Song Z, Ma S, Xing L, Wang K, Huang C, Li D, Chu J, Liu Y.	Environmental research	10.1016/j.envres.2023.115946
Large-scale assessment of PFAS compounds in drinking water sources using machine learning	Fernandez N, Nejadhashemi AP, Loveall C.	Water research	10.1016/j.watres.2023.120307
Latent, sex-specific metabolic health effects in CD-1 mouse offspring exposed to PFOA or HFPO-DA (GenX) during gestation	Cope HA, Blake BE, Love C, McCord J, Elmore SA, Harvey JB, Chappell VA, Fenton SE.	Emerging contaminants	10.1016/j.emcon.2021.10.004
Leaching and Transformation of Perfluoroalkyl Acids and Polyfluoroalkyl Phosphate Diesters in Unsaturated Soil Column Studies	Weidemann E, Lämmer R, Stahl T, Göckener B, Bücking M, Breuer J, Kowalczyk J, Just H, Boeddinghaus RS, Gassmann M.	Environmental toxicology and chemistry	10.1002/etc.5417
Leaching of Perfluoroalkyl Acids during Unsaturated Zone Flushing at a Field Site Impacted with Aqueous Film Forming Foam	Schaefer CE, Lavorgna GM, Lippincott DR, Nguyen D, Schaum A, Higgins CP, Field J.	Environmental science & technology	10.1021/acs.est.2c06903
Legacy and emerging per- and polyfluoroalkyl substances suppress the neutrophil respiratory burst	Phelps DW, Palekar AI, Conley HE, Ferrero G, Driggers JH, Linder KE, Kullman SW, Reif DM, Sheats MK, DeWitt JC, Yoder JA.	Journal of immunotoxicology	10.1080/1547691X.2023.2176953
Legacy and Emerging Per- and Polyfluoroalkyl Substances: Analytical Techniques, Environmental Fate, and Health Effects	Brase RA, Mullin EJ, Spink DC.	International journal of molecular sciences	10.3390/ijms22030995
Legacy and Emerging Perfluoroalkyl and Polyfluoroalkyl Substances Regulate Steroidogenesis in the Male Gonad	Daugherty S, Mulabagal V, Hayworth J, Akingbemi BT.	Endocrinology	10.1210/endocr/bqad142
Legacy and Novel Per- and Polyfluoroalkyl Substances in Juvenile Seabirds from the U.S. Atlantic Coast	Robuck AR, Cantwell MG, McCord JP, Addison LM, Pfohl M, Strynar MJ, McKinney R, Katz DR, Wiley DN, Lohmann R.	Environmental science & technology	10.1021/acs.est.0c01951
Legacy per- and polyfluoroalkyl substances (PFASs) and alternatives (short-chain analogues, F-53B, GenX and FC-98) in residential soils of China: Present implications of replacing legacy PFASs	Li J, He J, Niu Z, Zhang Y.	Environment international	10.1016/j.envint.2019.105419
Lethal and sublethal toxicity of perfluorooctanoic acid (PFOA) in chronic tests with Hyalella azteca (amphipod) and early-life stage tests with Pimephales promelas (fathead minnow)	Bartlett AJ, De Silva AO, Schissler DM, Hedges AM, Brown LR, Shires K, Miller J, Sullivan C, Spencer C, Parrott JL.	Ecotoxicology and environmental safety	10.1016/j.ecoenv.2020.111250
Leveraging DOM UV absorbance and fluorescence to accurately predict and monitor short-chain PFAS removal by fixed-bed carbon adsorbers	Aung MT, Shimabuku KK, Soares-Quinete N, Kearns JP.	Water research	10.1016/j.watres.2022.118146
Life-course Exposure to Perfluoroalkyl Substances in Relation to Markers of Glucose Homeostasis in Early Adulthood	Valvi D, Højlund K, Coull BA, Nielsen F, Weihe P, Grandjean P.	The Journal of clinical endocrinology and metabolism	10.1210/clinem/dgab267
Life-Time Environmental Chemical Exposure and Obesity: Review of Epidemiological Studies Using Human Biomonitoring Methods	Mohanto NC, Ito Y, Kato S, Kamijima M.	Frontiers in endocrinology	10.3389/fendo.2021.778737
Limited reproductive impairment in a passerine bird species exposed along a perfluoroalkyl acid (PFAA) pollution gradient	Groffen T, Lasters R, Lopez-Antia A, Prinsen E, Bervoets L, Eens M.	The Science of the total environment	10.1016/j.scitotenv.2018.10.273
Linking field and laboratory studies: Reproductive effects of perfluorinated substances on avian populations	Custer CM.	Integrated environmental assessment and management	10.1002/ieam.4394
Linking microbiomes with per- and poly-fluoroalkyl substances (PFASs) in soil ecosystems: Microbial community assembly, stability, and trophic phylosymbiosis	Wu JY, Ding FG, Shen ZW, Hua ZL, Gu L.	Chemosphere	10.1016/j.chemosphere.2022.135403
Lipid accumulation responses in the liver of Rana nigromaculata induced by perfluorooctanoic acid (PFOA)	Zhang H, He J, Li N, Gao N, Du Q, Chen B, Chen F, Shan X, Ding Y, Zhu W, Wu Y, Tang J, Jia X.	Ecotoxicology and environmental safety	10.1016/j.ecoenv.2018.09.120
Lipid metabolism disorders effects of 6:2 chlorinated polyfluorinated ether sulfonate through Hsa-miRNA-532-3p/Acyl-CoA oxidase 1(ACOX1) pathway	Li C, Jiang L, Jin Y, Zhang D, Chen J, Qi Y, Fan R, Luo J, Xu L, Ma W, Zhao K, Yu D.	Ecotoxicology and environmental safety	10.1016/j.ecoenv.2021.113011
Lipidomic Profiling of PFOA-Exposed Mouse Liver by Multi-Modal Mass Spectrometry Analysis	Stoffels CBA, Angerer TB, Robert H, Poupin N, Lakhal L, Frache G, Mercier-Bonin M, Audinot JN.	Analytical chemistry	10.1021/acs.analchem.2c05470
Liposome-mediated delivery of challenging chemicals to aid environmental assessment of Bioaccumulative (B) and Toxic (T) properties	Castro M, Lindqvist D.	Scientific reports	10.1038/s41598-020-66694-3
Liquid Chromatographic Tandem Mass Spectrometric (LC-MS/MS) Determination of Perfluorooctane Sulfonate (PFOS) and Perfluorooctanoic Acid (PFOA) in the Yolk of Poultry Eggs in Malaysia	Tahziz A, Mohamad Haron DE, Aziz MY.	Molecules (Basel, Switzerland)	10.3390/molecules25102335
Liver function biomarkers disorder is associated with exposure to perfluoroalkyl acids in adults: Isomers of C8 Health Project in China	Nian M, Li QQ, Bloom M, Qian ZM, Syberg KM, Vaughn MG, Wang SQ, Wei Q, Zeeshan M, Gurram N, Chu C, Wang J, Tian YP, Hu LW, Liu KK, Yang BY, Liu RQ, Feng D, Zeng XW, Dong GH.	Environmental research	10.1016/j.envres.2019.02.013
LncRNA MEG3 alleviates PFOS induced placental cell growth inhibition through its derived miR-770 targeting PTX3	Li J, Quan X, Lei S, Chen G, Hong J, Huang Z, Wang Q, Song W, Yang X.	Environmental pollution (Barking, Essex : 1987)	10.1016/j.envpol.2021.118542
Locomotion and brain gene expression exhibit sex-specific non-monotonic dose-response to HFPO-DA during Drosophila melanogaster lifespan	Vu JP, McLamb F, Feng Z, Griffin L, Gong S, Shea D, Szuch MA, Scott S, Gersberg RM, Bozinovic G.	Neurotoxicology	10.1016/j.neuro.2023.05.005
Long term toxicities following developmental exposure to perfluorooctanoic acid: Roles of peroxisome proliferation activated receptor alpha	Ni H, Yuan J, Ji J, Guo Y, Zhong S, Lin Y, Zheng Y, Jiang Q.	Environmental pollution (Barking, Essex : 1987)	10.1016/j.envpol.2022.120722
Long-chain perfluoroalkyl carboxylates induce cytoskeletal abnormalities and activate epithelial-mesenchymal transition in both renal cell carcinoma 3D cultures and Caki-1 xenografted mouse model	Lee BS, Kim Y, Park H, Im WJ, Han HY, Kim YB, Lim S, Yoo MH.	Environment international	10.1016/j.envint.2023.108093
Longitudinal analysis reveals early-pregnancy associations between perfluoroalkyl sulfonates and thyroid hormone status in a Canadian prospective birth cohort	Reardon AJF, Khodayari Moez E, Dinu I, Goruk S, Field CJ, Kinniburgh DW, MacDonald AM, Martin JW; APrON Study.	Environment international	10.1016/j.envint.2019.04.023
Longitudinal trajectories and determinants of plasma per- and polyfluoroalkyl substance (PFAS) levels from birth to early childhood and metabolomic associations: A pilot study in the Boston Birth Cohort	Zhang M, Yu CH, Wang G, Buckley JP, Hong X, Pearson C, Adams WG, Fan ZT, Wang X.	Precision nutrition
Long-Term Trends of Per- and Polyfluoroalkyl Substances (PFAS) in Suspended Particular Matter from German Rivers Using the Direct Total Oxidizable Precursor (dTOP) Assay	Göckener B, Fliedner A, Rüdel H, Badry A, Koschorreck J.	Environmental science & technology	10.1021/acs.est.1c04165
Low concentrations of perfluoroalkyl acids (PFAAs) in municipal drinking water associated with serum PFAA concentrations in Swedish adolescents	Nyström-Kandola J, Ahrens L, Glynn A, Johanson G, Benskin JP, Gyllenhammar I, Lignell S, Vogs C.	Environment international	10.1016/j.envint.2023.108166
Low concentrations of perfluorooctane sulfonate repress osteogenic and enhance adipogenic differentiation of human mesenchymal stem cells	Liu W, Qin H, Pan Y, Luo F, Zhang Z.	Toxicology and applied pharmacology	10.1016/j.taap.2019.02.001
Low dose PFDA induces DNA damage and DNA repair inhibition by promoting nuclear cGAS accumulation in ovarian epithelial cells	Qin Y, Yuan X, Cui Z, Chen W, Xu S, Chen K, Wang F, Zheng F, Ni H, Shen HM, Wu Y, Xia D.	Ecotoxicology and environmental safety	10.1016/j.ecoenv.2023.115503
Low Doses of PFOA Promote Prostate and Breast Cancer Cells Growth through Different Pathways	Charazac A, Hinault C, Dolfi B, Hautier S, Decondé Le Butor C, Bost F, Chevalier N.	International journal of molecular sciences	10.3390/ijms23147900
Low temperature destruction of gas-phase per- and polyfluoroalkyl substances using an alumina-based catalyst	Shields EP, Wallace MAG.	Journal of the Air & Waste Management Association (1995)	10.1080/10962247.2023.2210103
Low Temperature Thermal Treatment of Gas-Phase Fluorotelomer Alcohols by Calcium Oxide	Riedel TP, Wallace MAG, Shields EP, Ryan JV, Lee CW, Linak WP.	Chemosphere	10.1016/j.chemosphere.2021.129859
Low transplacental transfer of PFASs in the small-for-gestational-age (SGA) new-borns: Evidence from a Chinese birth cohort	Fan Y, Guo L, Wang R, Xu J, Fang Y, Wang W, Lv J, Tang W, Wang H, Xu DX, Tao L, Huang Y.	Chemosphere	10.1016/j.chemosphere.2023.139964
Low-Dose Metronomic Topotecan and Pazopanib (TOPAZ) in Children with Relapsed or Refractory Solid Tumors: A C17 Canadian Phase I Clinical Trial	Manji A, Samson Y, Deyell RJ, Johnston DL, Lewis VA, Zorzi AP, Berman JN, Brodeur-Robb K, Morrison E, Kee L, Kumar S, Baruchel S, Whitlock JA, Morgenstern DA.	Cancers	10.3390/cancers14122985
Low-dose perfluorooctanoic acid stimulates steroid hormone synthesis in Leydig cells: Integrated proteomics and metabolomics evidence	Huang Q, Luo L, Han X, Li F, Zhang X, Tian M.	Journal of hazardous materials	10.1016/j.jhazmat.2021.127656
Machine learning based texture analysis of patella from X-rays for detecting patellofemoral osteoarthritis	Bayramoglu N, Nieminen MT, Saarakkala S.	International journal of medical informatics	10.1016/j.ijmedinf.2021.104627
Machine Learning-based Prediction of HBV-related Hepatocellular Carcinoma and Detection of Key Candidate Biomarkers	Kucukakcali Z, Akbulut S, Colak C.	Medeniyet medical journal	10.4274/MMJ.galenos.2022.39049
Male reproductive toxicity involved in spermatogenesis induced by perfluorooctane sulfonate and perfluorooctanoic acid in Caenorhabditis elegans	Yin J, Jian Z, Zhu G, Yu X, Pu Y, Yin L, Wang D, Bu Y, Liu R.	Environmental science and pollution research international	10.1007/s11356-020-10530-8
Male reproductive toxicity of perfluorooctanoate (PFOA): Rodent studies	Wang Z, Zhang T, Wu J, Wei X, Xu A, Wang S, Wang Z.	Chemosphere	10.1016/j.chemosphere.2020.128608
Management of PFAS with the aid of chemical product registries-an indispensable tool for future control of hazardous substances	Steindal EH, Grung M.	Integrated environmental assessment and management	10.1002/ieam.4380
Managing health risks of perfluoroalkyl acids in aquatic food from a river-estuary-sea environment affected by fluorochemical industry	Wang P, Lu Y, Su H, Su C, Johnson AC, Yu L, Jenkins A.	Environment international	10.1016/j.envint.2020.105621
Mapping the distribution of perfluoroalkyl substances in zebrafishes by liquid extraction surface analysis mass spectrometry	Xiao Y, Deng J, Fang L, Tu L, Luan T.	Talanta	10.1016/j.talanta.2021.122377
Marine pollutant exposures and human milk extracellular vesicle-microRNAs in a mother-infant cohort from the Faroe Islands	Kupsco A, Lee JJ, Prada D, Valvi D, Hu L, Petersen MS, Coull BA, Weihe P, Grandjean P, Baccarelli AA.	Environment international	10.1016/j.envint.2021.106986
Marks and Mechanisms: Unraveling Potential Health Impacts of PFAS via DNA Methylation	Schmidt S.	Environmental health perspectives	10.1289/EHP11287
Mass-Based, Field-Scale Demonstration of PFAS Retention within AFFF-Associated Source Areas	Adamson DT, Nickerson A, Kulkarni PR, Higgins CP, Popovic J, Field J, Rodowa A, Newell C, DeBlanc P, Kornuc JJ.	Environmental science & technology	10.1021/acs.est.0c04472
Mass-Labeled Fluorotelomer Alcohol Fragmentation Gives "False Positive" for Nonlabeled Fluorotelomer Alcohols with Implications for Consumer Product Analysis	Cahuas L, Titaley IA, Field JA.	Journal of the American Society for Mass Spectrometry	10.1021/jasms.1c00332
Maternal and child biomonitoring strategies and levels of exposure in western Canada during the past seventeen years: The Alberta Biomonitoring Program: 2005-2021	MacDonald AM, Gabos S, Braakman S, Cheperdak L, Lee B, Hrudey SE, Le XC, Li XF, Mandal R, Martin JW, Schopflocher D, Lyon ME, Cheung PY, Ackah F, Graydon JA, Reichert M, Lyon AW, Jarrell J, Benadé G, Charlton C, Huang D, Bennett MJ, Kinniburgh DW.	International journal of hygiene and environmental health	10.1016/j.ijheh.2022.113990
Maternal co-exposure to mercury and perfluoroalkyl acid isomers and their associations with child neurodevelopment in a Canadian birth cohort	Reardon AJF, Hajihosseini M, Dinu I, Field CJ, Kinniburgh DW, MacDonald AM, Dewey D, England-Mason G, Martin JW; APrON Study.	Environment international	10.1016/j.envint.2023.108087
Maternal exposure causes mitochondrial dysfunction in brain, liver, and heart of mouse fetus: An explanation for perfluorooctanoic acid induced abortion and developmental toxicity	Salimi A, Nikoosiar Jahromi M, Pourahmad J.	Environmental toxicology	10.1002/tox.22760
Maternal Exposure to Per- and Polyfluoroalkyl Substances (PFAS) and Male Reproductive Function in Young Adulthood: Combined Exposure to Seven PFAS	Hærvig KK, Petersen KU, Hougaard KS, Lindh C, Ramlau-Hansen CH, Toft G, Giwercman A, Høyer BB, Flachs EM, Bonde JP, Tøttenborg SS.	Environmental health perspectives	10.1289/EHP10285
Maternal exposure to perfluoroalkyl chemicals and anogenital distance in the offspring: A Faroese cohort study	Christensen JVR, Bangash KK, Weihe P, Grandjean P, Nielsen F, Jensen TK, Petersen MS.	Reproductive toxicology (Elmsford, N.Y.)	10.1016/j.reprotox.2021.06.016
Maternal exposure to perfluorobutane sulfonate (PFBS) during pregnancy: evidence of adverse maternal and fetoplacental effects in New Zealand White (NZW) rabbits	Crute CE, Landon CD, Garner A, Hall SM, Everitt JI, Zhang S, Blake B, Olofsson D, Chen H, Stapleton HM, Murphy SK, Feng L.	Toxicological sciences : an official journal of the Society of Toxicology	10.1093/toxsci/kfac126
Maternal exposure to perfluorooctanoic acid (PFOA) causes liver toxicity through PPAR-α pathway and lowered histone acetylation in female offspring mice	Li D, Zhang L, Zhang Y, Guan S, Gong X, Wang X.	Environmental science and pollution research international	10.1007/s11356-019-05258-z
Maternal levels of perfluoroalkyl substances (PFASs) during pregnancy and childhood allergy and asthma related outcomes and infections in the Norwegian Mother and Child (MoBa) cohort	Impinen A, Longnecker MP, Nygaard UC, London SJ, Ferguson KK, Haug LS, Granum B.	Environment international	10.1016/j.envint.2018.12.041
Maternal per- and poly-fluoroalkyl substances exposure and child adiposity measures: A birth cohort study	Song X, Wu J, Ji H, Liang H, Chen Y, Yang L, Yuan W, Tu X, Miao M.	Ecotoxicology and environmental safety	10.1016/j.ecoenv.2023.114684
Maternal preconception PFOS exposure of Drosophila melanogaster alters reproductive capacity, development, morphology and nutrient regulation	Kim JH, Barbagallo B, Annunziato K, Farias-Pereira R, Doherty JJ, Lee J, Zina J, Tindal C, McVey C, Aresco R, Johnstone M, Sant KE, Timme-Laragy A, Park Y, Clark JM.	Food and chemical toxicology : an international journal published for the British Industrial Biological Research Association	10.1016/j.fct.2021.112153
Maternal serum perfluoroalkyl substance mixtures and thyroid hormone concentrations in maternal and cord sera: The HOME Study	Lebeaux RM, Doherty BT, Gallagher LG, Zoeller RT, Hoofnagle AN, Calafat AM, Karagas MR, Yolton K, Chen A, Lanphear BP, Braun JM, Romano ME.	Environmental research	10.1016/j.envres.2020.109395
Measurement of Novel, Drinking Water-Associated PFAS in Blood from Adults and Children in Wilmington, North Carolina	Kotlarz N, McCord J, Collier D, Lea CS, Strynar M, Lindstrom AB, Wilkie AA, Islam JY, Matney K, Tarte P, Polera ME, Burdette K, DeWitt J, May K, Smart RC, Knappe DRU, Hoppin JA.	Environmental health perspectives	10.1289/EHP6837
Mechanism of immunosuppression in zebrafish (Danio rerio) spleen induced by environmentally relevant concentrations of perfluorooctanoic acid	Zhong Y, Shen L, Ye X, Zhou D, He Y, Zhang H.	Chemosphere	10.1016/j.chemosphere.2020.126200
Mechanistic Insight for Disinfection Byproduct Formation Potential of Peracetic Acid and Performic Acid in Halide-Containing Water	Wang J, Xu J, Kim J, Huang CH.	Environmental science & technology	10.1021/acs.est.3c00670
Mechanistic Middle-Out Physiologically Based Toxicokinetic Modeling of Transporter-Dependent Disposition of Perfluorooctanoic Acid in Humans	Lin J, Chin SY, Tan SPF, Koh HC, Cheong EJY, Chan ECY, Chan JCY.	Environmental science & technology	10.1021/acs.est.2c05642
Mediating effect of endocrine hormones on association between per- and polyfluoroalkyl substances exposure and birth size: Findings from sheyang mini birth cohort study	Wang Z, Zhang J, Dai Y, Zhang L, Guo J, Xu S, Chang X, Wu C, Zhou Z.	Environmental research	10.1016/j.envres.2023.115658
Membrane-Water Partition Coefficients to Aid Risk Assessment of Perfluoroalkyl Anions and Alkyl Sulfates	Droge STJ.	Environmental science & technology	10.1021/acs.est.8b05052
Meta-Analysis Comparing Nominal and Measured Concentrations of Perfluorooctanoic Acid and Perfluorooctane Sulfonate in Aquatic Toxicity Studies Across Various Experimental Conditions	Jarvis AL, Justice JR, Schnitker B, Gallagher K.	Environmental toxicology and chemistry	10.1002/etc.5733
META-ANALYSIS OF DOLPHIN AND HUMAN PERIPHERAL BLOOD MONONUCLEAR CELLS REVEALS INFLAMMATORY SIGNATURES ASSOCIATED WITH EXPOSURE TO HIGH LEVELS OF PERFLUOROALKYL SUBSTANCES	Wolf BJ, Kamen DL, Fair P, Hardiman G.	International journal of advances in science, engineering and technology
Metabolic Perturbations Associated with an Exposure Mixture of Per- and Polyfluoroalkyl Substances in the Atlanta African American Maternal-Child Cohort	Liang D, Taibl KR, Dunlop AL, Barr DB, Ryan PB, Everson T, Huels A, Tan Y, Panuwet P, Kannan K, Marsit C, Jones DP, Eick SM.	Environmental science & technology	10.1021/acs.est.3c04561
Metabolic perturbations in pregnant rats exposed to low-dose perfluorooctanesulfonic acid: An integrated multi-omics analysis	Yu G, Wang J, Liu Y, Luo T, Meng X, Zhang R, Huang B, Sun Y, Zhang J.	Environment international	10.1016/j.envint.2023.107851
Metabolic profiling in human SH-SY5Y neuronal cells exposed to perfluorooctanoic acid (PFOA)	Souders CL 2nd, Sanchez CL, Malphurs W, Aristizabal-Henao JJ, Bowden JA, Martyniuk CJ.	Neurotoxicology	10.1016/j.neuro.2021.05.009
Metabolic Signatures of Youth Exposure to Mixtures of Per- and Polyfluoroalkyl Substances: A Multi-Cohort Study	Goodrich JA, Walker DI, He J, Lin X, Baumert BO, Hu X, Alderete TL, Chen Z, Valvi D, Fuentes ZC, Rock S, Wang H, Berhane K, Gilliland FD, Goran MI, Jones DP, Conti DV, Chatzi L.	Environmental health perspectives	10.1289/EHP11372
Metabolites of De Novo Purine Synthesis: Metabolic Regulators and Cytotoxic Compounds	Souckova O, Skopova V, Baresova V, Sedlak D, Bleyer AJ, Kmoch S, Zikanova M.	Metabolites	10.3390/metabo12121210
Metabolomic analysis reveals metabolic alterations of human peripheral blood lymphocytes by perfluorooctanoic acid	Li R, Guo C, Tse WKF, Su M, Zhang X, Lai KP.	Chemosphere	10.1016/j.chemosphere.2019.124810
Metabolomic responses to pre-chlorinated and final effluent wastewater with the addition of a sub-lethal persistent contaminant in Daphnia magna	Wagner ND, Helm PA, Simpson AJ, Simpson MJ.	Environmental science and pollution research international	10.1007/s11356-019-04318-8
Metabolomic, Lipidomic, Transcriptomic, and Metagenomic Analyses in Mice Exposed to PFOS and Fed Soluble and Insoluble Dietary Fibers	Deng P, Durham J, Liu J, Zhang X, Wang C, Li D, Gwag T, Ma M, Hennig B.	Environmental health perspectives	10.1289/EHP11360
Metabolomics analysis of the 3D L-02 cell cultures revealing the key role of metabolism of amino acids in ameliorating hepatotoxicity of perfluorooctanoic acid	Zhang R, Lu W, Yao Y, Tu L, Yu T, Luan T, Chen B.	The Science of the total environment	10.1016/j.scitotenv.2021.150438
Metabolomics of childhood exposure to perfluoroalkyl substances: a cross-sectional study	Kingsley SL, Walker DI, Calafat AM, Chen A, Papandonatos GD, Xu Y, Jones DP, Lanphear BP, Pennell KD, Braun JM.	Metabolomics : Official journal of the Metabolomic Society	10.1007/s11306-019-1560-z
Metagenomic analysis of soil microbial community under PFOA and PFOS stress	Cai Y, Chen H, Yuan R, Wang F, Chen Z, Zhou B.	Environmental research	10.1016/j.envres.2020.109838
Metals and per- and polyfluoroalkyl substances mixtures and birth outcomes in the New Hampshire Birth Cohort Study: Beyond single-class mixture approaches	Yim G, McGee G, Gallagher L, Baker E, Jackson BP, Calafat AM, Botelho JC, Gilbert-Diamond D, Karagas MR, Romano ME, Howe CG.	Chemosphere	10.1016/j.chemosphere.2023.138644
Metals and PFAS in stormwater and surface runoff in a semi-arid Canadian city subject to large variations in temperature among seasons	Codling G, Yuan H, Jones PD, Giesy JP, Hecker M.	Environmental science and pollution research international	10.1007/s11356-020-08070-2
Metastatic effects of perfluorooctanoic acid (PFOA) on Drosophila melanogaster with metabolic reprogramming and dysrhythmia in a multigenerational exposure scenario	Fangninou FF, Yu Z, Li W, Xue L, Yin D.	The Science of the total environment	10.1016/j.scitotenv.2023.169305
Method development for thermal desorption-gas chromatography-tandem mass spectrometry (TD-GC-MS/MS) analysis of trace level fluorotelomer alcohols emitted from consumer products	Robbins ZG, Liu X, Schumacher BA, Smeltz MG, Liberatore HK.	Journal of chromatography. A	10.1016/j.chroma.2023.464204
Method Validation for Quantification of PFOS and PFOA in Human Plasma and a Pilot Study in Blood Donors from Thai Red Cross Society	Lertassavakorn T, Pholphana N, Rangkadilok N, Suriyo T, Teeyapant P, Satayavivad J.	Toxics	10.3390/toxics11121015
Microcosm experiment to test bacterial responses to perfluorooctanoate exposure	Guo C, Ahrens L, Bertilsson S, Coolen MJL, Tang J.	The Science of the total environment	10.1016/j.scitotenv.2022.159685
Microfluidic Chip-Based Modeling of Three-Dimensional Intestine-Vessel-Liver Interactions in Fluorotelomer Alcohol Biotransformation	Xu N, Lin H, Lin JM, Cheng J, Wang P, Lin L.	Analytical chemistry	10.1021/acs.analchem.3c03892
MicroRNAs and Xenobiotic Toxicity: An Overview	Balasubramanian S, Gunasekaran K, Sasidharan S, Jeyamanickavel Mathan V, Perumal E.	Toxicology reports	10.1016/j.toxrep.2020.04.010
Minimal risk of PFOS residues in eel to Māori consumers	Shaw IC, King-Hudson TR.	The New Zealand medical journal
Mitochondrial iron overload mediated by cooperative transfer of plasma membrane ATP5B and TFR2 to mitochondria triggers hepatic insulin resistance under PFOS exposure	Wang J, Wang J, Qiu T, Wu J, Sun X, Jiang L, Liu X, Yang G, Cao J, Yao X.	Ecotoxicology and environmental safety	10.1016/j.ecoenv.2023.114662
Mixture effects of prenatal exposure to per- and polyfluoroalkyl substances and polybrominated diphenyl ethers on maternal and newborn telomere length	Eick SM, Goin DE, Cushing L, DeMicco E, Park JS, Wang Y, Smith S, Padula AM, Woodruff TJ, Morello-Frosch R.	Environmental health : a global access science source	10.1186/s12940-021-00765-4
Mixture of environmental pollutants in breast milk from a Spanish cohort of nursing mothers	Rovira J, Martínez MÁ, Mari M, Cunha SC, Fernandes JO, Marmelo I, Marques A, Haug LS, Thomsen C, Nadal M, Domingo JL, Schuhmacher M.	Environment international	10.1016/j.envint.2022.107375
Mixtures of environmental contaminants and diabetes	Lind L, Salihovic S, Lind PM.	The Science of the total environment	10.1016/j.scitotenv.2022.159993
Mixtures of per- and poly-fluoroalkyl substances (PFAS) reduce the in vitro activation of human T cells and basophils	Maddalon A, Pierzchalski A, Kretschmer T, Bauer M, Zenclussen AC, Marinovich M, Corsini E, Herberth G.	Chemosphere	10.1016/j.chemosphere.2023.139204
Mixtures of persistent organic pollutants are found in vital organs of late gestation human fetuses	Björvang RD, Vinnars MT, Papadogiannakis N, Gidlöf S, Mamsen LS, Mucs D, Kiviranta H, Rantakokko P, Ruokojärvi P, Lindh CH, Andersen CY, Damdimopoulou P.	Chemosphere	10.1016/j.chemosphere.2021.131125
Mixtures of persistent organic pollutants increase ovarian granulosa tumor cell line migration and spheroid invasion by upregulating MMP2 expression and activity via IGF1R	Gogola-Mruk J, Hoffmann-Młodzianowska M, Kamińska K, Ptak A.	Toxicology	10.1016/j.tox.2021.152715
Modeled prenatal exposure to per- and polyfluoroalkyl substances in association with child autism spectrum disorder: A case-control study	Shin HM, Bennett DH, Calafat AM, Tancredi D, Hertz-Picciotto I.	Environmental research	10.1016/j.envres.2020.109514
Modeling a well-characterized perfluorooctane sulfonate (PFOS) source and plume using the REMChlor-MD model to account for matrix diffusion	Kulkarni PR, Adamson DT, Popovic J, Newell CJ.	Journal of contaminant hydrology	10.1016/j.jconhyd.2022.103986
Modeling micropollutant removal by nanofiltration and reverse osmosis membranes: considerations and challenges	Castaño Osorio S, Biesheuvel PM, Spruijt E, Dykstra JE, van der Wal A.	Water research	10.1016/j.watres.2022.119130
Modeling PFAS Fate and Transport in Groundwater, with and Without Precursor Transformation	Gefell MJ, Huang H, Opdyke D, Gustafson K, Vlassopoulos D, McCray JE, Best S, Carey M.	Ground water	10.1111/gwat.13152
Modeling PFAS Removal Using Granular Activated Carbon for Full-Scale System Design	Burkhardt JB, Burns N, Mobley D, Pressman JG, Magnuson ML, Speth TF.	Journal of environmental engineering (New York, N.Y.)	10.1061/(asce)ee.1943-7870.0001964
Modeling the kinetics of perfluorooctanoic and perfluorooctane sulfonic acid biodegradation by Acidimicrobium sp. Strain A6 during the feammox process	Sima MW, Huang S, Jaffé PR.	Journal of hazardous materials	10.1016/j.jhazmat.2023.130903
Modeling the Partitioning of Anionic Carboxylic and Perfluoroalkyl Carboxylic and Sulfonic Acids to Octanol and Membrane Lipid	Torralba-Sanchez TL, Di Toro DM, Dmitrenko O, Murillo-Gelvez J, Tratnyek PG.	Environmental toxicology and chemistry	10.1002/etc.5716
Modeling the transplacental transfer of small molecules using machine learning: a case study on per- and polyfluorinated substances (PFAS)	Abrahamsson D, Siddharth A, Robinson JF, Soshilov A, Elmore S, Cogliano V, Ng C, Khan E, Ashton R, Chiu WA, Fung J, Zeise L, Woodruff TJ.	Journal of exposure science & environmental epidemiology	10.1038/s41370-022-00481-2
Modified linear solvation energy relationships for adsorption of perfluorocarboxylic acids by polystyrene microplastics	Hatinoglu MD, Perreault F, Apul OG.	The Science of the total environment	10.1016/j.scitotenv.2022.160524
Modulation of Neuro-Dopamine Homeostasis in Juvenile Female Atlantic Cod ( Gadus morhua) Exposed to Polycyclic Aromatic Hydrocarbons and Perfluoroalkyl Substances	Khan EA, Bertotto LB, Dale K, Lille-Langøy R, Yadetie F, Karlsen OA, Goksøyr A, Schlenk D, Arukwe A.	Environmental science & technology	10.1021/acs.est.9b00637
Molecular and genetic analyses revealed the phytotoxicity of perfluorobutane sulfonate	Sun L, Zhang P, Liu F, Ju Q, Xu J.	Environment international	10.1016/j.envint.2022.107646
Molecular and phenotypic responses of male crucian carp (Carassius auratus) exposed to perfluorooctanoic acid	Dong H, Lu G, Yan Z, Liu J, Ji Y.	The Science of the total environment	10.1016/j.scitotenv.2018.11.017
Molecular Screening and Toxicity Estimation of 260,000 Perfluoroalkyl and Polyfluoroalkyl Substances (PFASs) through Machine Learning	Lai TT, Kuntz D, Wilson AK.	Journal of chemical information and modeling	10.1021/acs.jcim.2c00374
Monitoring the nitrous oxide emissions and biological nutrient removal from wastewater treatment: Impact of perfluorooctanoic acid	Chen H, Zou M, Zhou Y, Zeng L, Yang X.	Journal of hazardous materials	10.1016/j.jhazmat.2020.123469
Morphological evidence of neurotoxic effects in chicken embryos after exposure to perfluorooctanoic acid (PFOA) and inorganic cadmium	Kmecick M, Vieira da Costa MC, Oliveira Ribeiro CA, Ortolani-Machado CF.	Toxicology	10.1016/j.tox.2019.152286
Morphological plasticity in Chlamydomonas reinhardtii and acclimation to micropollutant stress	Cheloni G, Slaveykova VI.	Aquatic toxicology (Amsterdam, Netherlands)	10.1016/j.aquatox.2020.105711
Morphometric signatures of exposure to endocrine disrupting chemicals in zebrafish eleutheroembryos	Martínez R, Herrero-Nogareda L, Van Antro M, Campos MP, Casado M, Barata C, Piña B, Navarro-Martín L.	Aquatic toxicology (Amsterdam, Netherlands)	10.1016/j.aquatox.2019.105232
Multicompartment occurrence and partitioning of alternative and legacy per- and polyfluoroalkyl substances in an impacted river in China	Gao L, Liu J, Bao K, Chen N, Meng B.	The Science of the total environment	10.1016/j.scitotenv.2020.138753
Multigenerational Effects of a Complex Human-Relevant Exposure during Folliculogenesis and Preimplantation Embryo Development: The FEDEXPO Study	El Fouikar S, Duranthon V, Helies V, Jammes H, Couturier-Tarrade A, Gayrard V, Van Acker N, Frenois FX, Archilla C, Rousseau-Ralliard D, Gatimel N, Léandri R.	Toxics	10.3390/toxics11050425
Multilayered glycoproteomic analysis reveals the hepatotoxic mechanism in perfluorooctane sulfonate (PFOS) exposure mice	Li D, Jiang L, Hong Y, Cai Z.	Environmental pollution (Barking, Essex : 1987)	10.1016/j.envpol.2020.115774
Multi-parameter risk assessment of forty-one selected substances with endocrine disruptive properties in surface waters worldwide	Grobin A, Roškar R, Trontelj J.	Chemosphere	10.1016/j.chemosphere.2021.132195
Multiple toxicity evaluations of perfluorooctane sulfonate on intact planarian Dugesia japonica	Sun J, Shao X, Huang J, Gong M, Zhang J, Yuan Z.	Environmental science and pollution research international	10.1007/s11356-023-26842-4
Municipal solid waste incineration (MSWI) ash co-disposal: Influence on per- and polyfluoroalkyl substances (PFAS) concentration in landfill leachate	Liu Y, Mendoza-Perilla P, Clavier KA, Tolaymat TM, Bowden JA, Solo-Gabriele HM, Townsend TG.	Waste management (New York, N.Y.)	10.1016/j.wasman.2022.03.009
N-acetyl cysteine abates hepatorenal toxicities induced by perfluorooctanoic acid exposure in male rats	Owumi S, Bello T, Oyelere AK.	Environmental toxicology and pharmacology	10.1016/j.etap.2021.103667
Nanopore sensing of γ-cyclodextrin induced host-guest interaction to reverse the binding of perfluorooctanoic acid to human serum albumin	Wei X, Wang Q, Liu C.	Proteomics	10.1002/pmic.202100058
Nanoremediation technologies for sustainable remediation of contaminated environments: Recent advances and challenges	Ganie AS, Bano S, Khan N, Sultana S, Rehman Z, Rahman MM, Sabir S, Coulon F, Khan MZ.	Chemosphere	10.1016/j.chemosphere.2021.130065
Native mass spectrometry for the design and selection of protein bioreceptors for perfluorinated compounds	Daems E , Moro G , Berghmans H , Moretto LM , Dewilde S , Angelini A , Sobott F , De Wael K .	The Analyst	10.1039/d0an02005b
Natural and engineered clays and clay minerals for the removal of poly- and perfluoroalkyl substances from water: State-of-the-art and future perspectives	Mukhopadhyay R, Sarkar B, Palansooriya KN, Dar JY, Bolan NS, Parikh SJ, Sonne C, Ok YS.	Advances in colloid and interface science	10.1016/j.cis.2021.102537
Neonatal and juvenile exposure to perfluorooctanoate (PFOA) and perfluorooctane sulfonate (PFOS): Advance puberty onset and kisspeptin system disturbance in female rats	Du G, Hu J, Huang Z, Yu M, Lu C, Wang X, Wu D.	Ecotoxicology and environmental safety	10.1016/j.ecoenv.2018.10.025
Neonatal per- and polyfluoroalkyl substance exposure in relation to retinoblastoma	Chen Y, Paul KC, Walker DI, Jones DP, Wang X, Ritz BR, Heck JE.	Environmental research	10.1016/j.envres.2023.117435
Nephrotoxicity of perfluorooctane sulfonate (PFOS)-effect on transcription and epigenetic factors	Wen Y, Rashid F, Fazal Z, Singh R, Spinella MJ, Irudayaraj J.	Environmental epigenetics	10.1093/eep/dvac010
Neurodevelopmental and Metabolomic Responses from Prenatal Coexposure to Perfluorooctanesulfonate (PFOS) and Methylmercury (MeHg) in Sprague-Dawley Rats	Reardon AJF, Karathra J, Ribbenstedt A, Benskin JP, MacDonald AM, Kinniburgh DW, Hamilton TJ, Fouad K, Martin JW.	Chemical research in toxicology	10.1021/acs.chemrestox.9b00192
Neuroprotective effects of blueberry anthocyanins against perfluorooctanoic sulfonate on planarian Dugesia japonica	Shao X, Zhao B, Wang B, Zhao B, Zhu Y, Yuan Z, Zhang J.	Ecotoxicology and environmental safety	10.1016/j.ecoenv.2019.03.023
Neurotoxic effects of lactational exposure to perfluorooctane sulfonate on learning and memory in adult male mouse	Mshaty A, Haijima A, Takatsuru Y, Ninomiya A, Yajima H, Kokubo M, Khairinisa MA, Miyazaki W, Amano I, Koibuchi N.	Food and chemical toxicology : an international journal published for the British Industrial Biological Research Association	10.1016/j.fct.2020.111710
Neurotoxic effects of perfluoroalkyl acids: Neurobehavioral deficit and its molecular mechanism	Wang Y, Wang L, Chang W, Zhang Y, Zhang Y, Liu W.	Toxicology letters	10.1016/j.toxlet.2019.01.012
Neurotransmission Targets of Per- and Polyfluoroalkyl Substance Neurotoxicity: Mechanisms and Potential Implications for Adverse Neurological Outcomes	Brown-Leung JM, Cannon JR.	Chemical research in toxicology	10.1021/acs.chemrestox.2c00072
Neutral Per- and Polyfluoroalkyl Substances, Butyl Carbitol, and Organic Corrosion Inhibitors in Aqueous Film-Forming Foams: Implications for Vapor Intrusion and the Environment	Titaley IA, Khattak J, Dong J, Olivares CI, DiGuiseppi B, Lutes CC, Field JA.	Environmental science & technology	10.1021/acs.est.2c02349
New approach methodologies: A quantitative in vitro to in vivo extrapolation case study with PFASs	Fragki S, Louisse J, Bokkers B, Luijten M, Peijnenburg A, Rijkers D, Piersma AH, Zeilmaker MJ.	Food and chemical toxicology : an international journal published for the British Industrial Biological Research Association	10.1016/j.fct.2022.113559
New compounds, old problems. The case of C6O4 - a substitute of PFOA - and its effects to the clam Ruditapes philippinarum	Fabrello J, Ciscato M, Masiero L, Finos L, Valsecchi S, Polesello S, Bernardini I, Rovere GD, Bargelloni L, Massimo M, Patarnello T, Marin MG, Matozzo V.	Journal of hazardous materials	10.1016/j.jhazmat.2021.126689
New insights into the degradation mechanism and risk assessment of HFPO-DA by advanced oxidation processes based on activated persulfate in aqueous solutions	Zhang C, Xu Y, Liu W, Zhou H, Zhang N, Fang Z, Gao J, Sun X, Feng D, Sun X.	Ecotoxicology and environmental safety	10.1016/j.ecoenv.2023.115298
Next generation per- and poly-fluoroalkyl substances: Status and trends, aquatic toxicity, and risk assessment	Mahoney H, Xie Y, Brinkmann M, Giesy JP.	Eco-Environment & Health	10.1016/j.eehl.2022.05.002
Next-generation PFAS 6:2 fluorotelomer sulfonate reduces plaque formation in exposed white-footed mice	Bohannon ME, Narizzano AM, Guigni BA, East AG, Quinn MJ.	Toxicological sciences : an official journal of the Society of Toxicology	10.1093/toxsci/kfad006
Nitro-Oxidative Stress and Mitochondrial Dysfunction in Human Cell Lines Exposed to the Environmental Contaminants PFOA and BPA	Magnifico MC, Xhani M, Sprovera B, Buttari B, Abballe G, Desideri F, Panieri E, Saso L, Arese M.	Frontiers in bioscience (Landmark edition)	10.31083/j.fbl2710292
No association between maternal and child PFAS concentrations and repeated measures of ADHD symptoms at age 2½ and 5 years in children from the Odense Child Cohort	Dalsager L, Jensen TK, Nielsen F, Grandjean P, Bilenberg N, Andersen HR.	Neurotoxicology and teratology	10.1016/j.ntt.2021.107031
Nonlethal detection of PFAS bioaccumulation and biomagnification within fishes in an urban- and wastewater-dominant Great Lakes watershed	George SE, Baker TR, Baker BB.	Environmental pollution (Barking, Essex : 1987)	10.1016/j.envpol.2023.121123
Non-target screening of micropollutants and transformation products for assessing AOP-BAC treatment in groundwater	Tisler S, Tüchsen PL, Christensen JH.	Environmental pollution (Barking, Essex : 1987)	10.1016/j.envpol.2022.119758
Nontarget Screening of Per- and Polyfluoroalkyl Substances Binding to Human Liver Fatty Acid Binding Protein	Yang D, Han J, Hall DR, Sun J, Fu J, Kutarna S, Houck KA, LaLone CA, Doering JA, Ng CA, Peng H.	Environmental science & technology	10.1021/acs.est.0c00049
Nontargeted Identification and Temporal Trends of Per- and Polyfluoroalkyl Substances in a Fluorochemical Industrial Zone and Adjacent Taihu Lake	Yao J, Sheng N, Guo Y, Yeung LWY, Dai J, Pan Y.	Environmental science & technology	10.1021/acs.est.2c00891
Nontargeted identification of per- and polyfluoroalkyl substances in human follicular fluid and their blood-follicle transfer	Kang Q, Gao F, Zhang X, Wang L, Liu J, Fu M, Zhang S, Wan Y, Shen H, Hu J.	Environment international	10.1016/j.envint.2020.105686
Nontargeted mass-spectral detection of chloroperfluoropolyether carboxylates in New Jersey soils	Washington JW, Rosal CG, McCord JP, Strynar MJ, Lindstrom AB, Bergman EL, Goodrow SM, Tadesse HK, Pilant AN, Washington BJ, Davis MJ, Stuart BG, Jenkins TM.	Science (New York, N.Y.)	10.1126/science.aba7127
Non-targeted metabolomics of multiple human cells revealing differential toxic effects of perfluorooctanoic acid	Zhang R, Yao Y, Tu L, Luan T, Chen B.	Journal of hazardous materials	10.1016/j.jhazmat.2020.125017
Nontargeted screening reveals fluorotelomer ethoxylates in indoor dust and industrial wastewater	Steeves KL, Bissram MJ, Kleywegt S, Stevens D, Dorman FL, Simpson AJ, Simpson MJ, Cahill LS, Jobst KJ.	Environment international	10.1016/j.envint.2022.107634
Novel In Vitro Intestinal Microbiome Model to Study Lipidomic and Metabolomic Adaptations Due to Exposure to Glyphosate, Perfluorooctanoic Acid, and Docusate Sodium	Aristizabal-Henao JJ, Bowden JA.	Chemical research in toxicology	10.1021/acs.chemrestox.3c00091
Novel niobium-doped titanium oxide towards electrochemical destruction of forever chemicals	Ko JS, Le NQ, Schlesinger DR, Zhang D, Johnson JK, Xia Z.	Scientific reports	10.1038/s41598-021-97596-7
Novel perfluoroalkyl substances (PFAS) discovered in whole blood using automated non-targeted analysis of dried blood spots	Koelmel JP, Lin EZ, Parry E, Stelben P, Rennie EE, Godri Pollitt KJ.	The Science of the total environment	10.1016/j.scitotenv.2023.163579
Novel PFOS alternative OBS inhibits body growth of developing zebrafish by triggering thyroid function disorder and osteoclast differentiation	Wang Q, Liu Y, Zhang M, Liu S, Wan N, Li M, Tu W.	Chemosphere	10.1016/j.chemosphere.2023.140068
Ny-Ålesund-oriented organic pollutants in sewage effluent and receiving seawater in the Arctic region of Kongsfjorden	Choi Y, Kim K, Kim D, Moon HB, Jeon J.	Environmental pollution (Barking, Essex : 1987)	10.1016/j.envpol.2019.113792
Observed and predicted embryotoxic and teratogenic effects of organic and inorganic environmental pollutants and their mixtures in zebrafish (Danio rerio)	Nilén G, Obamwonyi OS, Liem-Nguyen V, Engwall M, Larsson M, Keiter SH.	Aquatic toxicology (Amsterdam, Netherlands)	10.1016/j.aquatox.2022.106175
Occurrence and Bioaccumulation Patterns of Per- and Polyfluoroalkyl Substances (PFAS) in the Marine Environment	Khan B, Burgess RM, Cantwell MG.	ACS ES&T water	10.1021/acsestwater.2c00296
Occurrence and contamination profile of legacy and emerging per- and polyfluoroalkyl substances (PFAS) in Belgian wastewater using target, suspect and non-target screening approaches	Jeong Y, Da Silva KM, Iturrospe E, Fuiji Y, Boogaerts T, van Nuijs ALN, Koelmel J, Covaci A.	Journal of hazardous materials	10.1016/j.jhazmat.2022.129378
Occurrence and dietary intake of Perfluoroalkyl substances in foods of the residents in Beijing, China	Wang X, Wang Y, Li J, Liu J, Zhao Y, Wu Y.	Food additives & contaminants. Part B, Surveillance	10.1080/19393210.2020.1821098
Occurrence and implications of per and polyfluoroalkyl substances in animal feeds used in laboratory toxicity testing	Choi YJ, Lee LS, Hoskins TD, Gharehveran MM, Sepúlveda MS.	The Science of the total environment	10.1016/j.scitotenv.2023.161583
Occurrence and pattern of legacy and emerging per- and Poly-FluoroAlkyl substances (PFAS) in eggs of loggerhead turtle Caretta caretta from western Mediterranean	Moretti S, Brambilla G, Maffucci F, Barola C, Bucaletti E, Hochscheid S, Canzanella S, Galarini R, Esposito M.	Environmental pollution (Barking, Essex : 1987)	10.1016/j.envpol.2023.123257
Occurrence and tissue distribution of perfluoroalkyl substances (PFASs) in sharks and rays from the eastern Mediterranean Sea	Zafeiraki E, Gebbink WA, van Leeuwen SPJ, Dassenakis E, Megalofonou P.	Environmental pollution (Barking, Essex : 1987)	10.1016/j.envpol.2019.05.120
Occurrence and toxicity mechanisms of perfluorobutanoic acid (PFBA) and perfluorobutane sulfonic acid (PFBS) in fish	Ivantsova E, Lu A, Martyniuk CJ.	Chemosphere	10.1016/j.chemosphere.2023.140815
Occurrence of legacy and alternative per- and polyfluoroalkyl substances in serum from high exposure population and their disrupting effects on serum lipids and thyroid function	Liu J, Song L, Zhan J, Zhong Y, Shi Z.	The Science of the total environment	10.1016/j.scitotenv.2023.162988
Occurrence of Per- and Polyfluoroalkyl Substance Contamination of Food Sources and Aquaculture Organisms Used in Aquatic Laboratory Experiments	Rushing R, Schmokel C, Brooks BW, Simcik MF.	Environmental toxicology and chemistry	10.1002/etc.5624
Occurrence of per- and polyfluoroalkyl substances (PFASs) in raw milk and feed from nine Chinese provinces and human exposure risk assessment	Liu Y, Zhang Q, Li Y, Hao Y, Li J, Zhang L, Wang P, Yin Y, Zhang S, Li T, Wang Y, Dong S, Wei S, Zhang W, Su X, Li X.	Chemosphere	10.1016/j.chemosphere.2022.134521
Occurrence of per- and polyfluoroalkyl substances (PFASs) in wastewater of major cities across China in 2014 and 2016	Lu Y, Gao J, Nguyen HT, Vijayasarathy S, Du P, Li X, Yao H, Mueller JF, Thai PK.	Chemosphere	10.1016/j.chemosphere.2021.130590
Occurrence of perfluoroalkyl substances in selected Victorian rivers and estuaries: An historical snapshot	Allinson M, Yamashita N, Taniyasu S, Yamazaki E, Allinson G.	Heliyon	10.1016/j.heliyon.2019.e02472
Occurrence of persistent and mobile chemicals and other contaminants of emerging concern in Spanish and Portuguese wastewater treatment plants, transnational river basins and coastal water	Montes R, Méndez S, Cobas J, Carro N, Neuparth T, Alves N, Santos MM, Quintana JB, Rodil R.	The Science of the total environment	10.1016/j.scitotenv.2023.163737
Occurrence of regulated pollutants in populated Mediterranean basins: Ecotoxicological risk and effects on biological quality	Llorens E, Ginebreda A, la Farré M, Insa S, González-Trujillo JD, Munné A, Solà C, Flò M, Villagrasa M, Barceló D, Sabater S.	The Science of the total environment	10.1016/j.scitotenv.2020.141224
Occurrence, profiles, and ecotoxicity of poly- and perfluoroalkyl substances and their alternatives in global apex predators: A critical review	Chen Y, Fu J, Ye T, Li X, Gao K, Xue Q, Lv J, Zhang A, Fu J.	Journal of environmental sciences (China)	10.1016/j.jes.2021.03.036
Omics approach reveals perturbation of metabolism and phenotype in Caenorhabditis elegans triggered by perfluorinated compounds	Kim HM, Long NP, Yoon SJ, Anh NH, Kim SJ, Park JH, Kwon SW.	The Science of the total environment	10.1016/j.scitotenv.2019.135500
On the Ability of Perfluorohexane Sulfonate (PFHxS) Bioaccumulation by Two Pseudomonas sp. Strains Isolated from PFAS-Contaminated Environmental Matrices	Presentato A, Lampis S, Vantini A, Manea F, Daprà F, Zuccoli S, Vallini G.	Microorganisms	10.3390/microorganisms8010092
On the swelling behavior of poly(N-Isopropylacrylamide) hydrogels exposed to perfluoroalkyl acids	Savage DT, Briot NJ, Hilt JZ, Dziubla TD.	Journal of polymer science (2020)	10.1002/pol.20200805
Optimizing Chemicals Management in the United States and Canada through the Essential-Use Approach	Bǎlan SA, Andrews DQ, Blum A, Diamond ML, Fernández SR, Harriman E, Lindstrom AB, Reade A, Richter L, Sutton R, Wang Z, Kwiatkowski CF.	Environmental science & technology	10.1021/acs.est.2c05932
Optimizing the physiological pharmacokinetic model to rank the risks of persistent organic pollutants towards fish on the Tibetan Plateau	Zhou Y, Zhuoga S, Chen Y, Wang X, Fu J, Zhou W, Gao S.	The Science of the total environment	10.1016/j.scitotenv.2023.164774
Orally Administered 6:2 Chlorinated Polyfluorinated Ether Sulfonate (F-53B) Causes Thyroid Dysfunction in Rats	Hong SH, Lee SH, Yang JY, Lee JH, Jung KK, Seok JH, Kim SH, Nam KT, Jeong J, Lee JK, Oh JH.	Toxics	10.3390/toxics8030054
ORD Human Health Toxicity Value for Perfluoropropanoic Acid (CASRN 422-64-0|DTXSID8059970)	Lambert JC, Lizarraga L, Owens EO, Shirke A, Cai C, Radke EG.
Organic anion transporting polypeptide 3a1 is a novel influx pump for Perfluorooctane sulfonate in Sertoli cells and contributes to its reproductive toxicity	Li T, Jiang L, Zheng S, Qiu C, Zhao N, Lin X, Ren H, Huang J, Wang H, Qiu L.	Chemosphere	10.1016/j.chemosphere.2023.140428
Organic contaminants sorbed to microplastics affect marine medaka fish early life stages development	Le Bihanic F, Clérandeau C, Cormier B, Crebassa JC, Keiter SH, Beiras R, Morin B, Bégout ML, Cousin X, Cachot J.	Marine pollution bulletin	10.1016/j.marpolbul.2020.111059
Organohalogen compounds of emerging concern in Baltic Sea biota: Levels, biomagnification potential and comparisons with legacy contaminants	de Wit CA, Bossi R, Dietz R, Dreyer A, Faxneld S, Garbus SE, Hellström P, Koschorreck J, Lohmann N, Roos A, Sellström U, Sonne C, Treu G, Vorkamp K, Yuan B, Eulaers I.	Environment international	10.1016/j.envint.2020.106037
Organophosphate Flame Retardants, Highly Fluorinated Chemicals, and Biomarkers of Placental Development and Disease During Mid-Gestation	Varshavsky JR, Robinson JF, Zhou Y, Puckett KA, Kwan E, Buarpung S, Aburajab R, Gaw SL, Sen S, Gao S, Smith SC, Park JS, Zakharevich I, Gerona RR, Fisher SJ, Woodruff TJ.	Toxicological sciences : an official journal of the Society of Toxicology	10.1093/toxsci/kfab028
Oxidative stress and Cx43-mediated apoptosis are involved in PFOS-induced nephrotoxicity	Tang L, Yu J, Zhuge S, Chen H, Zhang L, Jiang G.	Toxicology	10.1016/j.tox.2022.153283
Oysters for legacy and emerging per- and polyfluoroalkyl substances (PFASs) monitoring in estuarine and coastal waters: Phase distribution and bioconcentration profile	Wang Q, Ruan Y, Jin L, Lu G, Ma L, Yeung LWY, Wang WX, Lam PKS.	The Science of the total environment	10.1016/j.scitotenv.2022.157453
Pachypodol attenuates Perfluorooctane sulphonate-induced testicular damage by reducing oxidative stress	Umar Ijaz M, Rauf A, Mustafa S, Ahmed H, Ashraf A, Al-Ghanim K, Swamy Mruthinti S, Mahboob S.	Saudi journal of biological sciences	10.1016/j.sjbs.2021.12.012
Paints: A Source of Volatile PFAS in Air─Potential Implications for Inhalation Exposure	Cahuas L, Muensterman DJ, Kim-Fu ML, Reardon PN, Titaley IA, Field JA.	Environmental science & technology	10.1021/acs.est.2c04864
Paired Liver:Plasma PFAS Concentration Ratios from Adolescents in the Teen-LABS Study and Derivation of Empirical and Mass Balance Models to Predict and Explain Liver PFAS Accumulation	Baumert BO, Fischer FC, Nielsen F, Grandjean P, Bartell S, Stratakis N, Walker DI, Valvi D, Kohli R, Inge T, Ryder J, Jenkins T, Sisley S, Xanthakos S, Rock S, La Merrill MA, Conti D, McConnell R, Chatzi L.	Environmental science & technology	10.1021/acs.est.3c02765
Parental exposure to 6:2 chlorinated polyfluorinated ether sulfonate (F-53B) induced transgenerational thyroid hormone disruption in zebrafish	Shi G, Wang J, Guo H, Sheng N, Cui Q, Pan Y, Guo Y, Sun Y, Dai J.	The Science of the total environment	10.1016/j.scitotenv.2019.02.198
Participant Reactions to Medical Screening: A Survey of Satisfaction With the C8 (PFOA) Health Project	Malone C, Çığ G, Brown P, Ducatman A.	New solutions : a journal of environmental and occupational health policy : NS	10.1177/1048291119850109
Pathology in Ecological Research With Implications for One Health: Session Summary	Haschek WM, Berenbaum M, Hinton DE, Cora M, Chernoff N, Travlos G, Liu CW, Lu K, Law M.	Toxicologic pathology	10.1177/0192623319880530
Patterns in Serum Toxicokinetics in Peromyscus Exposed to Per- and Polyfluoroalkyl Substances	Narizzano AM, Bohannon ME, East AG, McDonough C, Choyke S, Higgins CP, Quinn MJ Jr.	Environmental toxicology and chemistry	10.1002/etc.5151
PBTK modeled perfluoroalkyl acid kinetics in zebrafish eleutheroembryos suggests impacts on bioconcentrations by chorion porosity dynamics	Billat PA, Vogs C, Blassiau C, Brochot C, Wincent E, Brion F, Beaudouin R.	Toxicology in vitro : an international journal published in association with BIBRA	10.1016/j.tiv.2023.105588
Per- and perfluoroalkyl substances alternatives, mixtures and liver function in adults: A community-based population study in China	Liu JJ, Cui XX, Tan YW, Dong PX, Ou YQ, Li QQ, Chu C, Wu LY, Liang LX, Qin SJ, Zeeshan M, Zhou Y, Hu LW, Liu RQ, Zeng XW, Dong GH, Zhao XM.	Environment international	10.1016/j.envint.2022.107179
Per- and polyfluoroalkyl mixtures toxicity assessment "Proof-of-Concept" illustration for the hazard index approach	Mumtaz MM, Buser MC, Pohl HR.	Journal of toxicology and environmental health. Part A	10.1080/15287394.2021.1901251
Per- and polyfluoroalkyl substance (PFAS) exposure, maternal metabolomic perturbation, and fetal growth in African American women: A meet-in-the-middle approach	Chang CJ, Barr DB, Ryan PB, Panuwet P, Smarr MM, Liu K, Kannan K, Yakimavets V, Tan Y, Ly V, Marsit CJ, Jones DP, Corwin EJ, Dunlop AL, Liang D.	Environment international	10.1016/j.envint.2021.106964
Per- and Polyfluoroalkyl Substance Exposure Combined with High-Fat Diet Supports Prostate Cancer Progression	Imir OB, Kaminsky AZ, Zuo QY, Liu YJ, Singh R, Spinella MJ, Irudayaraj J, Hu WY, Prins GS, Madak Erdogan Z.	Nutrients	10.3390/nu13113902
Per- and Polyfluoroalkyl Substance Toxicity and Human Health Review: Current State of Knowledge and Strategies for Informing Future Research	Fenton SE, Ducatman A, Boobis A, DeWitt JC, Lau C, Ng C, Smith JS, Roberts SM.	Environmental toxicology and chemistry	10.1002/etc.4890
Per- and poly-fluoroalkyl substances (PFAS) and female reproductive outcomes: PFAS elimination, endocrine-mediated effects, and disease	Rickard BP, Rizvi I, Fenton SE.	Toxicology	10.1016/j.tox.2021.153031
Per and poly-fluoroalkyl substances (PFAS) as a contaminant of emerging concern in surface water: A transboundary review of their occurrences and toxicity effects	Podder A, Sadmani AHMA, Reinhart D, Chang NB, Goel R.	Journal of hazardous materials	10.1016/j.jhazmat.2021.126361
Per- and polyfluoroalkyl substances (PFAS) augment adipogenesis and shift the proteome in murine 3T3-L1 adipocytes	Modaresi SMS, Wei W, Emily M, DaSilva NA, Slitt AL.	Toxicology	10.1016/j.tox.2021.153044
Per- and polyfluoroalkyl substances (PFAS) determination in shellfish by liquid chromatography coupled to accurate mass spectrometry	Piva E, Ioime P, Dall'Ara S, Fais P, Pascali JP.	Drug testing and analysis	10.1002/dta.3282
Per- and polyfluoroalkyl substances (PFAS) distribution in landfill gas collection systems: leachate and gas condensate partitioning	Smallwood TJ, Robey NM, Liu Y, Bowden JA, Tolaymat TM, Solo-Gabriele HM, Townsend TG.	Journal of hazardous materials	10.1016/j.jhazmat.2023.130926
Per- and polyfluoroalkyl substances (PFAS) exposure might be a risk factor for thyroid cancer	Jing L, Shi Z.	EBioMedicine	10.1016/j.ebiom.2023.104866
Per- and polyfluoroalkyl substances (PFAS) exposure through munitions in the Russia-Ukraine conflict	Koban LA, Pfluger AR.	Integrated environmental assessment and management	10.1002/ieam.4672
Per- and polyfluoroalkyl substances (PFAS) in Australia: Current levels and estimated population reference values for selected compounds	Toms LML, Bräunig J, Vijayasarathy S, Phillips S, Hobson P, Aylward LL, Kirk MD, Mueller JF.	International journal of hygiene and environmental health	10.1016/j.ijheh.2019.03.004
Per- and polyfluoroalkyl substances (PFAS) in breast milk and infant formula: A global issue	LaKind JS, Naiman J, Verner MA, Lévêque L, Fenton S.	Environmental research	10.1016/j.envres.2022.115042
Per- and Polyfluoroalkyl Substances (PFAS) in Facemasks: Potential Source of Human Exposure to PFAS with Implications for Disposal to Landfills	Muensterman DJ, Cahuas L, Titaley IA, Schmokel C, De la Cruz FB, Barlaz MA, Carignan CC, Peaslee GF, Field JA.	Environmental science & technology letters	10.1021/acs.estlett.2c00019
Per- and Polyfluoroalkyl Substances (PFAS) in Integrated Crop-Livestock Systems: Environmental Exposure and Human Health Risks	Jha G, Kankarla V, McLennon E, Pal S, Sihi D, Dari B, Diaz D, Nocco M.	International journal of environmental research and public health	10.3390/ijerph182312550
Per- and polyfluoroalkyl substances (PFAS) in livestock and game species: A review	Death C, Bell C, Champness D, Milne C, Reichman S, Hagen T.	The Science of the total environment	10.1016/j.scitotenv.2020.144795
Per- and polyfluoroalkyl substances (PFAS) in mixtures show additive effects on transcriptomic points of departure in human liver spheroids	Addicks GC, Rowan-Carroll A, Reardon AJF, Leingartner K, Williams A, Meier MJ, Moffat I, Carrier R, Lorusso L, Wetmore BA, Yauk CL, Atlas E.	Toxicological sciences : an official journal of the Society of Toxicology	10.1093/toxsci/kfad044
Per- and polyfluoroalkyl substances (PFAS) in plasma of the West Indian manatee (Trichechus manatus)	Palmer K, Bangma JT, Reiner JL, Bonde RK, Korte JE, Boggs ASP, Bowden JA.	Marine pollution bulletin	10.1016/j.marpolbul.2019.02.010
Per- and polyfluoroalkyl substances (PFAS) in river discharge: Modeling loads upstream and downstream of a PFAS manufacturing plant in the Cape Fear watershed, North Carolina	Pétré MA, Salk KR, Stapleton HM, Ferguson PL, Tait G, Obenour DR, Knappe DRU, Genereux DP.	The Science of the total environment	10.1016/j.scitotenv.2022.154763
Per- and polyfluoroalkyl substances (PFAS) in sediments collected from the Pensacola Bay System watershed	Ahmadireskety A, Da Silva BF, Awkerman JA, Aufmuth J, Yost RA, Bowden JA.	Environmental advances	10.1016/j.envadv.2021.100088
Per- and Polyfluoroalkyl Substances (PFAS) in Surface Water Near US Air Force Bases: Prioritizing Individual Chemicals and Mixtures for Toxicity Testing and Risk Assessment	East A, Anderson RH, Salice CJ.	Environmental toxicology and chemistry	10.1002/etc.4893
Per- and polyfluoroalkyl substances (PFAS) inhibit cytochrome P450 CYP3A7 through direct coordination to the heme iron and water displacement	Hvizdak M, Kandel SE, Work HM, Gracey EG, McCullough RL, Lampe JN.	Journal of inorganic biochemistry	10.1016/j.jinorgbio.2023.112120
Per- and Polyfluoroalkyl Substances (PFAS) Neurotoxicity in Sentinel and Non-Traditional Laboratory Model Systems: Potential Utility in Predicting Adverse Outcomes in Human Health	Foguth R, Sepúlveda MS, Cannon J.	Toxics	10.3390/toxics8020042
Per- and Polyfluoroalkyl Substances (PFAS): Significance and Considerations within the Regulatory Framework of the USA	Langenbach B, Wilson M.	International journal of environmental research and public health	10.3390/ijerph182111142
Per- and Polyfluoroalkyl Substances (PFASs) Impair Lipid Metabolism in Rana nigromaculata: A Field Investigation and Laboratory Study	Lin H, Liu Z, Yang H, Lu L, Chen R, Zhang X, Zhong Y, Zhang H.	Environmental science & technology	10.1021/acs.est.2c03452
Per- and poly-fluoroalkyl substances (PFASs) in follicular fluid from women experiencing infertility in Australia	Kim YR, White N, Bräunig J, Vijayasarathy S, Mueller JF, Knox CL, Harden FA, Pacella R, Toms LL.	Environmental research	10.1016/j.envres.2020.109963
Per- and polyfluoroalkyl substances (PFASs) in water and sediment from a temperate watershed in China: Occurrence, sources, and ecological risks	An X, Lei H, Lu Y, Xie X, Wang P, Liao J, Liang Z, Sun B, Wu Z.	The Science of the total environment	10.1016/j.scitotenv.2023.164207
Per- and polyfluoroalkyl substances (PFASs) modify lung surfactant function and pro-inflammatory responses in human bronchial epithelial cells	Sørli JB, Låg M, Ekeren L, Perez-Gil J, Haug LS, Da Silva E, Matrod MN, Gützkow KB, Lindeman B.	Toxicology in vitro : an international journal published in association with BIBRA	10.1016/j.tiv.2019.104656
Per- and polyfluoroalkyl substances activate UPR pathway, induce steatosis and fibrosis in liver cells	Qi Q, Niture S, Gadi S, Arthur E, Moore J, Levine KE, Kumar D.	Environmental toxicology	10.1002/tox.23680
Per- and Poly-fluoroalkyl Substances and Bile Acid Profiles in Pregnant Women	Yang L, Chen Y, Ji H, Zhang X, Zhou Y, Li J, Wang Y, Xie Z, Yuan W, Liang H, Miao M.	Environmental science & technology	10.1021/acs.est.3c05106
Per- and polyfluoroalkyl substances and blood pressure in pre-diabetic adults-cross-sectional and longitudinal analyses of the diabetes prevention program outcomes study	Lin PD, Cardenas A, Hauser R, Gold DR, Kleinman KP, Hivert MF, Calafat AM, Webster TF, Horton ES, Oken E.	Environment international	10.1016/j.envint.2020.105573
Per- and Polyfluoroalkyl Substances and Breastfeeding as a Vulnerable Function: A Systematic Review of Epidemiological Studies	Timmermann A, Avenbuan ON, Romano ME, Braun JM, Tolstrup JS, Vandenberg LN, Fenton SE.	Toxics	10.3390/toxics11040325
Per- and polyfluoroalkyl substances and cardiometabolic diseases: A review	Schillemans T, Donat-Vargas C, Åkesson A.	Basic & clinical pharmacology & toxicology	10.1111/bcpt.13949
Per- and polyfluoroalkyl substances and male reproductive health: a systematic review of the epidemiological evidence	Petersen KU, Larsen JR, Deen L, Flachs EM, Hærvig KK, Hull SD, Bonde JPE, Tøttenborg SS.		10.1080/10937404.2020.1798315
Per- and polyfluoroalkyl substances and psychosocial stressors have a joint effect on adverse pregnancy outcomes in the Atlanta African American Maternal-Child cohort	Eick SM, Barr DB, Brennan PA, Taibl KR, Tan Y, Robinson M, Kannan K, Panuwet P, Yakimavets V, Ryan PB, Liang D, Dunlop AL.	The Science of the total environment	10.1016/j.scitotenv.2022.159450
Per- and polyfluoroalkyl substances and the associated thyroid cancer risk: A case-control study in China	Li H, Yang M, Yang J, Seery S, Ma C, Liu Y, Zhang X, Li A, Guo H.	Chemosphere	10.1016/j.chemosphere.2023.139411
Per- and Polyfluoroalkyl Substances Are Positively Associated with Thyroid Hormones in an Arctic Seabird	Ask AV, Jenssen BM, Tartu S, Angelier F, Chastel O, Gabrielsen GW.	Environmental toxicology and chemistry	10.1002/etc.4978
Per- and Polyfluoroalkyl Substances Differentially Inhibit Placental Trophoblast Migration and Invasion In Vitro	Szilagyi JT, Freedman AN, Kepper SL, Keshava AM, Bangma JT, Fry RC.	Toxicological sciences : an official journal of the Society of Toxicology	10.1093/toxsci/kfaa043
Per- and polyfluoroalkyl substances display structure-dependent inhibition towards UDP-glucuronosyltransferases	Liu YZ, Zhang ZP, Fu ZW, Yang K, Ding N, Hu LG, Fang ZZ, Zhuo X.	Environmental pollution (Barking, Essex : 1987)	10.1016/j.envpol.2019.113093
Per- and polyfluoroalkyl substances enhance Staphylococcus aureus pathogenicity and impair host immune response	Mangu JCK, Stylianou M, Olsson PE, Jass J.	Environmental pollution (Barking, Essex : 1987)	10.1016/j.envpol.2022.120294
Per- and polyfluoroalkyl substances exposure and its influence on the intestinal barrier: An overview on the advances	Li J, Wang L, Zhang X, Liu P, Deji Z, Xing Y, Zhou Y, Lin X, Huang Z.	The Science of the total environment	10.1016/j.scitotenv.2022.158362
Per- and polyfluoroalkyl substances exposure during pregnancy and adverse pregnancy and birth outcomes: A systematic review and meta-analysis	Gao X, Ni W, Zhu S, Wu Y, Cui Y, Ma J, Liu Y, Qiao J, Ye Y, Yang P, Liu C, Zeng F.	Environmental research	10.1016/j.envres.2021.111632
Per- and polyfluoroalkyl substances in ambient fine particulate matter in the Pearl River Delta, China: Levels, distribution and health implications	Liu LS, Guo YT, Wu QZ, Zeeshan M, Qin SJ, Zeng HX, Lin LZ, Chou WC, Yu YJ, Dong GH, Zeng XW.	Environmental pollution (Barking, Essex : 1987)	10.1016/j.envpol.2023.122138
Per- and polyfluoroalkyl substances in blood plasma - Results of the German Environmental Survey for children and adolescents 2014-2017 (GerES V)	Duffek A, Conrad A, Kolossa-Gehring M, Lange R, Rucic E, Schulte C, Wellmitz J.	International journal of hygiene and environmental health	10.1016/j.ijheh.2020.113549
Per- and Polyfluoroalkyl Substances in Ducks and the Relationship with Concentrations in Water, Sediment, and Soil	Sharp S, Sardiña P, Metzeling L, McKenzie R, Leahy P, Menkhorst P, Hinwood A.	Environmental toxicology and chemistry	10.1002/etc.4818
Per- and Polyfluoroalkyl Substances in Personal Hygiene Products: The Implications for Human Exposure and Emission to the Environment	Zhou Y, Lin X, Xing Y, Zhang X, Lee HK, Huang Z.	Environmental science & technology	10.1021/acs.est.2c08912
Per- and Poly-Fluoroalkyl Substances in Portuguese Rivers: Spatial-Temporal Monitoring	Barbosa MO, Ratola N, Homem V, Pereira MFR, Silva AMT, Ribeiro ARL, Llorca M, Farré M.	Molecules (Basel, Switzerland)	10.3390/molecules28031209
Per- and polyfluoroalkyl substances in the environment	Evich MG, Davis MJB, McCord JP, Acrey B, Awkerman JA, Knappe DRU, Lindstrom AB, Speth TF, Tebes-Stevens C, Strynar MJ, Wang Z, Weber EJ, Henderson WM, Washington JW.	Science (New York, N.Y.)	10.1126/science.abg9065
Per- and polyfluoroalkyl substances in umbilical cord serum and body mass index trajectories from birth to age 10 years: Findings from a longitudinal birth cohort (SMBCS)	Dai Y, Zhang J, Wang Z, Ding J, Xu S, Zhang B, Guo J, Qi X, Chang X, Wu C, Zhou Z.	Environment international	10.1016/j.envint.2023.108238
Per- and polyfluoroalkyl substances in water and wastewater: A critical review of their global occurrence and distribution	Kurwadkar S, Dane J, Kanel SR, Nadagouda MN, Cawdrey RW, Ambade B, Struckhoff GC, Wilkin R.	The Science of the total environment	10.1016/j.scitotenv.2021.151003
Per and polyfluoroalkyl substances scientific literature review: water exposure, impact on human health, and implications for regulatory reform	Chohan A, Petaway H, Rivera-Diaz V, Day A, Colaianni O, Keramati M.	Reviews on environmental health	10.1515/reveh-2020-0049
Per- and polyfluoroalkyl substances target and alter human prostate stem-progenitor cells	Hu WY, Lu R, Hu DP, Imir OB, Zuo Q, Moline D, Afradiasbagharani P, Liu L, Lowe S, Birch L, Griend DJV, Madak-Erdogan Z, Prins GS.	Biochemical pharmacology	10.1016/j.bcp.2021.114902
Per- and polyfluoroalkyl substances, polychlorinated biphenyls, organochlorine pesticides, and polybrominated diphenyl ethers and dysregulation of MicroRNA expression in humans and animals-A systematic review	Li Y, Baumert BO, Costello E, Chen JC, Rock S, Stratakis N, Goodrich JA, Zhao Y, Eckel SP, Walker DI, Valvi D, La Merrill MA, McConnell R, Cortessis VK, Aung M, Wu H, Baccarelli A, Conti D, Chatzi L.	Environmental research	10.1016/j.envres.2023.117832
Per- and Polyfluoroalkyl Substances: An Emerging Contaminant of Concern	Anderko L, Pennea E, Chalupka S.	Annual review of nursing research	10.1891/0739-6686.38.159
Per- and Polyfluoroalkyl-Contaminated Freshwater Impacts Adjacent Riparian Food Webs	Koch A, Jonsson M, Yeung LWY, Kärrman A, Ahrens L, Ekblad A, Wang T.	Environmental science & technology	10.1021/acs.est.0c01640
Per- and polyfluoroalkyl substances, epigenetic age and DNA methylation: a cross-sectional study of firefighters	Goodrich JM, Calkins MM, Caban-Martinez AJ, Stueckle T, Grant C, Calafat AM, Nematollahi A, Jung AM, Graber JM, Jenkins T, Slitt AL, Dewald A, Cook Botelho J, Beitel S, Littau S, Gulotta J, Wallentine D, Hughes J, Popp C, Burgess JL.	Epigenomics	10.2217/epi-2021-0225
Per-and polyfluoroalkyl substances (PFAS) and persistent chemical mixtures in dust from U.S. colleges	Schildroth S, Rodgers KM, Strynar M, McCord J, Poma G, Covaci A, Dodson RE.	Environmental research	10.1016/j.envres.2021.112530
Perfluorinated alkyl substances impede growth, reproduction, lipid metabolism and lifespan in Daphnia magna	Seyoum A, Pradhan A, Jass J, Olsson PE.	The Science of the total environment	10.1016/j.scitotenv.2020.139682
Perfluorinated chemicals (PFOA) can, by interacting with highly brominated diphenyl ethers (PBDE 209) during a defined period of neonatal brain development, exacerbate neurobehavioural defects	Eriksson P, Johansson N, Viberg H, Buratovic S, Fredriksson A.	Neurotoxicology and teratology	10.1016/j.ntt.2022.107150
Perfluorinated compound correlation between human serum and drinking water: Is drinking water a significant contributor?	Wu S, Yuan T, Fu W, Dong H, Zhang Y, Zhang M, Jiang C, Xu Q, Zhang L, Qiang Z.	The Science of the total environment	10.1016/j.scitotenv.2023.162471
Perfluorinated compounds (PFCs) in regional industrial rivers: Interactions between pollution flux and eukaryotic community phylosymbiosis	Wu JY, Hua ZL, Gu L, Li XQ, Gao C, Liu YY.	Environmental research	10.1016/j.envres.2021.111876
Perfluorinated substances, risk factors for multiple sclerosis and cellular immune activation	Ammitzbøll C, Börnsen L, Petersen ER, Oturai AB, Søndergaard HB, Grandjean P, Sellebjerg F.	Journal of neuroimmunology	10.1016/j.jneuroim.2019.03.002
Perfluoroalkyl Acid Binding with Peroxisome Proliferator-Activated Receptors α, γ, and δ, and Fatty Acid Binding Proteins by Equilibrium Dialysis with a Comparison of Methods	Khazaee M, Christie E, Cheng W, Michalsen M, Field J, Ng C.	Toxics	10.3390/toxics9030045
Perfluoroalkyl acids and sulfonamides and dietary, biological and ecological associations in peregrine falcons from the Laurentian Great Lakes Basin, Canada	Sun J, Letcher RJ, Eens M, Covaci A, Fernie KJ.	Environmental research	10.1016/j.envres.2020.110151
Perfluoroalkyl acids and their isomers, diabetes, anemia, and albuminuria: Variabilities with deteriorating kidney function	Jain RB.	Ecotoxicology and environmental safety	10.1016/j.ecoenv.2020.111625
Perfluoroalkyl acids in sediment and water surrounding historical fire training areas at Barksdale Air Force Base	Wilkinson RS, Lanza HA, Olson AD, Mudge JF, Salice CJ, Anderson TA.	PeerJ	10.7717/peerj.13054
Perfluoroalkyl acids potentiate glutamate excitotoxicity in rat cerebellar granule neurons	Berntsen HF, Moldes-Anaya A, Bjørklund CG, Ragazzi L, Haug TM, Strandabø RAU, Verhaegen S, Paulsen RE, Ropstad E, Tasker RA.	Toxicology	10.1016/j.tox.2020.152610
Perfluoroalkyl acids, hyperuricemia and gout in adults: Analyses of NHANES 2009-2014	Scinicariello F, Buser MC, Balluz L, Gehle K, Murray HE, Abadin HG, Attanasio R.	Chemosphere	10.1016/j.chemosphere.2020.127446
Perfluoroalkyl and polyfluoroalkyl substances (PFASs) crossing the blood-cerebrospinal fluid barrier: Their occurrence in human cerebrospinal fluid	Hu W, Zhang MY, Liu LY, Zhang ZF, Guo Y.	Journal of hazardous materials	10.1016/j.jhazmat.2022.130003
Perfluoroalkyl and polyfluoroalkyl substances (PFASs) in groundwater: current understandings and challenges to overcome	Zhao Z, Li J, Zhang X, Wang L, Wang J, Lin T.	Environmental science and pollution research international	10.1007/s11356-022-20755-4
Perfluoroalkyl and polyfluoroalkyl substances and hypertensive disorders of pregnancy: A systematic review and meta-analysis	Hu CY, Qiao JC, Gui SY, Xu KX, Dzhambov AM, Zhang XJ.	Environmental research	10.1016/j.envres.2023.116064
Perfluoroalkyl and polyfluoroalkyl substances in cord serum of newborns and their potential factors	Jia J, Duan L, Dong B, Dong Q, Liu Y, Yu W, Yang L, Shi H.	Chemosphere	10.1016/j.chemosphere.2022.137525
Perfluoroalkyl and Polyfluoroalkyl Substances in Groundwater Used as a Source of Drinking Water in the Eastern United States	McMahon PB, Tokranov AK, Bexfield LM, Lindsey BD, Johnson TD, Lombard MA, Watson E.	Environmental science & technology	10.1021/acs.est.1c04795
Perfluoroalkyl Carboxylic Acids Interact with the Human Bile Acid Transporter NTCP	Ruggiero MJ, Miller H, Idowu JY, Zitzow JD, Chang SC, Hagenbuch B.	Livers	10.3390/livers1040017
Perfluoroalkyl Chemicals and Male Reproductive Health: Do PFOA and PFOS Increase Risk for Male Infertility?	Tarapore P, Ouyang B.	International journal of environmental research and public health	10.3390/ijerph18073794
Perfluoroalkyl chemicals in neurological health and disease: Human concerns and animal models	Piekarski DJ, Diaz KR, McNerney MW.	Neurotoxicology	10.1016/j.neuro.2020.01.001
Perfluoroalkyl Contaminant Exposure and Effects in Tree Swallows Nesting at Clarks Marsh, Oscoda, Michigan, USA	Custer CM, Custer TW, Delaney R, Dummer PM, Schultz S, Karouna-Renier N.	Archives of environmental contamination and toxicology	10.1007/s00244-019-00620-1
Perfluoroalkyl Substance Exposure and the BDNF Pathway in the Placental Trophoblast	Marchese MJ, Li S, Liu B, Zhang JJ, Feng L.	Frontiers in endocrinology	10.3389/fendo.2021.694885
Perfluoroalkyl substance pollution: detecting and visualizing emerging trends based on CiteSpace	Huang J, Xiang S, Chen S, Wu W, Huang T, Pang Y.	Environmental science and pollution research international	10.1007/s11356-022-20756-3
Perfluoroalkyl Substances (PFAS) Affect Inflammation in Lung Cells and Tissues	Dragon J, Hoaglund M, Badireddy AR, Nielsen G, Schlezinger J, Shukla A.	International journal of molecular sciences	10.3390/ijms24108539
Perfluoroalkyl substances (PFAS) and lead (Pb) as "cardiovascular disruptors" in 9-11-year-old children living in Syracuse, New York, United States	Gump BB, Hill DT, Robinson M, Kannan K, Heffernan K, Atallah-Yunes NH, Brann L, Parsons PJ, Palmer CD, MacKenzie JA, Goodrich JM, Bendinskas K.	Environmental research	10.1016/j.envres.2023.116758
Perfluoroalkyl Substances (PFAS) and Their Effects on the Placenta, Pregnancy, and Child Development: a Potential Mechanistic Role for Placental Peroxisome Proliferator-Activated Receptors (PPARs)	Szilagyi JT, Avula V, Fry RC.	Current environmental health reports	10.1007/s40572-020-00279-0
Perfluoroalkyl substances (PFAS) in drinking water and risk for polycystic ovarian syndrome, uterine leiomyoma, and endometriosis: A Swedish cohort study	Hammarstrand S, Jakobsson K, Andersson E, Xu Y, Li Y, Olovsson M, Andersson EM.	Environment international	10.1016/j.envint.2021.106819
Perfluoroalkyl substances (PFAS) in tern eggs from St. Brandon's Atoll, Indian Ocean	van der Schyff V, Kwet Yive NSC, Polder A, Cole NC, Bouwman H.	Marine pollution bulletin	10.1016/j.marpolbul.2020.111061
Perfluoroalkyl substances (PFASs) are substrates of the renal human organic anion transporter 4 (OAT4)	Louisse J, Dellafiora L, van den Heuvel JJMW, Rijkers D, Leenders L, Dorne JCM, Punt A, Russel FGM, Koenderink JB.	Archives of toxicology	10.1007/s00204-022-03428-6
Perfluoroalkyl substances (PFASs) decrease the expression of recombination-activating genes (RAG1 and RAG2) in human B lymphoma Namalwa cells	Janssen AWF, Louisse J, Rijkers D, Pinckaers NET, Hoekstra SA, Hoogenboom RLAP, Peijnenburg AACM, Beekmann K.	Archives of toxicology	10.1007/s00204-022-03405-z
Perfluoroalkyl substances (PFASs) exposure and kidney damage: Causal interpretation using the US 2003-2018 National Health and Nutrition Examination Survey (NHANES) datasets	Moon J.	Environmental pollution (Barking, Essex : 1987)	10.1016/j.envpol.2021.117707
Perfluoroalkyl substances and anthropomorphic measures in children (ages 3-11 years), NHANES 2013-2014	Scinicariello F, Buser MC, Abadin HG, Attanasio R.	Environmental research	10.1016/j.envres.2020.109518
Perfluoroalkyl substances and bone health in young men: a pilot study	Di Nisio A, De Rocco Ponce M, Giadone A, Rocca MS, Guidolin D, Foresta C.	Endocrine	10.1007/s12020-019-02096-4
Perfluoroalkyl substances and changes in bone mineral density: A prospective analysis in the POUNDS-LOST study	Hu Y, Liu G, Rood J, Liang L, Bray GA, de Jonge L, Coull B, Furtado JD, Qi L, Grandjean P, Sun Q.	Environmental research	10.1016/j.envres.2019.108775
Perfluoroalkyl substances and cognitive function in older adults: Should we consider non-monotonic dose-responses and chronic kidney disease?	Park SK, Ding N, Han D.	Environmental research	10.1016/j.envres.2020.110346
Perfluoroalkyl substances and metabolic syndrome	Christensen KY, Raymond M, Meiman J.	International journal of hygiene and environmental health	10.1016/j.ijheh.2018.08.014
Perfluoroalkyl substances and risk of type II diabetes: A prospective nested case-control study	Donat-Vargas C, Bergdahl IA, Tornevi A, Wennberg M, Sommar J, Kiviranta H, Koponen J, Rolandsson O, Åkesson A.	Environment international	10.1016/j.envint.2018.12.026
Perfluoroalkyl substances are increased in patients with late-onset ulcerative colitis and induce intestinal barrier defects ex vivo in murine intestinal tissue	Fart F, Salihović S, McGlinchey A, Gareau MG, Orešič M, Halfvarson J, Hyötyläinen T, Schoultz I.	Scandinavian journal of gastroenterology	10.1080/00365521.2021.1961306
Perfluoroalkyl substances exposure alters stomatal opening and xylem hydraulics in willow plants	Battisti I, Zambonini D, Ebinezer LB, Trentin AR, Meggio F, Petit G, Masi A.	Chemosphere	10.1016/j.chemosphere.2023.140380
Perfluoroalkyl substances exposure in firefighters: Sources and implications	Rosenfeld PE, Spaeth KR, Remy LL, Byers V, Muerth SA, Hallman RC, Summers-Evans J, Barker S.	Environmental research	10.1016/j.envres.2022.115164
Perfluoroalkyl substances in diamondback terrapins (Malaclemys terrapin) in coastal South Carolina	Bangma JT, Ragland JM, Rainwater TR, Bowden JA, Gibbons JW, Reiner JL.	Chemosphere	10.1016/j.chemosphere.2018.10.023
Perfluoroalkyl substances in drinking water sources along the Yangtze River in Jiangsu Province, China: Human health and ecological risk assessment	Zhang Y, Zhou Y, Zhang A, Li J, Yu J, Dou Y, He J, Kong D.	Ecotoxicology and environmental safety	10.1016/j.ecoenv.2021.112289
Perfluoroalkyl substances in sediments from the Bering Sea to the western Arctic: Source and pathway analysis	Lin Y, Jiang JJ, Rodenburg LA, Cai M, Wu Z, Ke H, Chitsaz M.	Environment international	10.1016/j.envint.2020.105699
Perfluoroalkyl substances in the Lingang hybrid constructed wetland, Tianjin, China: occurrence, distribution characteristics, and ecological risks	Chen Z, Ren G, Ma X, Ding Y, Hui Y, Qin P, Xu Z, Gu X, Yuan F, Liu Y.	Environmental science and pollution research international	10.1007/s11356-020-09921-8
Perfluoroalkyl Substances Increase Susceptibility of Northern Leopard Frog Tadpoles to Trematode Infection	Brown SR, Flynn RW, Hoverman JT.	Environmental toxicology and chemistry	10.1002/etc.4678
Perfluoroalkyl substances influence DNA methylation in school-age children highly exposed through drinking water contaminated from firefighting foam: a cohort study in Ronneby, Sweden	Xu Y, Lindh CH, Fletcher T, Jakobsson K, Engström K.	Environmental epigenetics	10.1093/eep/dvac004
Perfluoroalkyl Substances of Significant Environmental Concern Can Strongly Inhibit Human Carbonic Anhydrase Isozymes	Nguyen GTH, Nocentini A, Angeli A, Gratteri P, Supuran CT, Donald WA.	Analytical chemistry	10.1021/acs.analchem.0c00163
Perfluoroalkyl substances promote breast cancer progression via ERα and GPER mediated PI3K/Akt and MAPK/Erk signaling pathways	Liu Q, Liu Y, Li X, Wang D, Zhang A, Pang J, He J, Chen X, Tang NJ.	Ecotoxicology and environmental safety	10.1016/j.ecoenv.2023.114980
Perfluoroalkyl Substances Stimulate Insulin Secretion by Islet β Cells via G Protein-Coupled Receptor 40	Qin WP, Cao LY, Li CH, Guo LH, Colbourne J, Ren XM.	Environmental science & technology	10.1021/acs.est.9b07295
Perfluoroalkylated acids (PFAAs) accumulate in field-exposed snails (Cepaea sp.) and affect their oxidative status	Rijnders J, Bervoets L, Prinsen E, Eens M, Beemster GTS, AbdElgawad H, Groffen T.	The Science of the total environment	10.1016/j.scitotenv.2021.148059
Perfluorobutanesulfonate exposure induces metabolic disturbances in different regions of mouse gut	Chen L, Zhu M, Liu Y, Yang Z, Li H, Mu H, Liu S, Wu B.	The Science of the total environment	10.1016/j.scitotenv.2022.161261
Perfluorobutanesulfonic Acid Disrupts Pancreatic Organogenesis and Regulation of Lipid Metabolism in the Zebrafish, Danio rerio	Sant KE, Venezia OL, Sinno PP, Timme-Laragy AR.	Toxicological sciences : an official journal of the Society of Toxicology	10.1093/toxsci/kfy237
Perfluoroctanoic acid (PFOA) enhances NOTCH-signaling in an angiogenesis model of placental trophoblast cells	Poteser M, Hutter HP, Moshammer H, Weitensfelder L.	International journal of hygiene and environmental health	10.1016/j.ijheh.2020.113566
Perfluoroethylcyclohexane sulphonate, an emerging perfluoroalkyl substance, disrupts mitochondrial membranes and the expression of key molecular targets in vitro	Mahoney H, Cantin J, Xie Y, Brinkmann M, Giesy JP.	Aquatic toxicology (Amsterdam, Netherlands)	10.1016/j.aquatox.2023.106453
Perfluorohexanesulfonic acid (PFHxS) induces oxidative stress and causes developmental toxicities in zebrafish embryos	Ulhaq ZS, Tse WKF.	Journal of hazardous materials	10.1016/j.jhazmat.2023.131722
Perfluorohexanoic acid toxicity, part I: Development of a chronic human health toxicity value for use in risk assessment	Luz AL, Anderson JK, Goodrum P, Durda J.	Regulatory toxicology and pharmacology : RTP	10.1016/j.yrtph.2019.01.019
Perfluorohexanoic acid toxicity, part II: Application of human health toxicity value for risk characterization	Anderson JK, Luz AL, Goodrum P, Durda J.	Regulatory toxicology and pharmacology : RTP	10.1016/j.yrtph.2019.01.020
Perfluorononanoic acid impedes mouse oocyte maturation by inducing mitochondrial dysfunction and oxidative stress	Jiao X, Liu N, Xu Y, Qiao H.	Reproductive toxicology (Elmsford, N.Y.)	10.1016/j.reprotox.2021.07.002
Perfluorononanoic Acid Induces Neurotoxicity via Synaptogenesis Signaling in Zebrafish	Liu S, Qiu W, Li R, Chen B, Wu X, Magnuson JT, Xu B, Luo S, Xu EG, Zheng C.	Environmental science & technology	10.1021/acs.est.2c06739
Perfluorooctane Sulfonamide (PFOSA) Induces Cardiotoxicity via Aryl Hydrocarbon Receptor Activation in Zebrafish	Chen H, Qiu W, Yang X, Chen F, Chen J, Tang L, Zhong H, Magnuson JT, Zheng C, Xu EG.	Environmental science & technology	10.1021/acs.est.1c08875
Perfluorooctane Sulfonate (PFOS) and Perfluorohexane Sulfonate (PFHxS) Alters Protein Phosphorylation, Increase ROS Levels and DNA Fragmentation during In Vitro Capacitation of Boar Spermatozoa	Oseguera-López I, Pérez-Cerezales S, Ortiz-Sánchez PB, Mondragon-Payne O, Sánchez-Sánchez R, Jiménez-Morales I, Fierro R, González-Márquez H.	Animals : an open access journal from MDPI	10.3390/ani10101934
Perfluorooctane sulfonate (PFOS) and perfluorooctanoate (PFOA) acutely affect human α(1)β(2)γ(2L) GABA(A) receptor and spontaneous neuronal network function in vitro	Tukker AM, Bouwman LMS, van Kleef RGDM, Hendriks HS, Legler J, Westerink RHS.	Scientific reports	10.1038/s41598-020-62152-2
Perfluorooctane sulfonate (PFOS) and perfluorooctanoic acid (PFOA) induce epigenetic alterations and promote human breast cell carcinogenesis in vitro	Pierozan P, Cattani D, Karlsson O.	Archives of toxicology	10.1007/s00204-020-02848-6
Perfluorooctane sulfonate (PFOS) causes aging damage in the liver through the mt-DNA-mediated NLRP3 signaling pathway	Xiaopeng C, Jin T.	Ecotoxicology and environmental safety	10.1016/j.ecoenv.2023.115121
Perfluorooctane sulfonate (PFOS) disrupts testosterone biosynthesis via CREB/CRTC2/StAR signaling pathway in Leydig cells	Qiu L, Wang H, Dong T, Huang J, Li T, Ren H, Wang X, Qu J, Wang S.	Toxicology	10.1016/j.tox.2020.152663
Perfluorooctane sulfonate (PFOS) disturbs fatty acid metabolism in Caenorhabditis elegans: Evidence from chemical analysis and molecular mechanism exploration	Wei C, Zhou Z, Wang L, Huang Z, Liang Y, Zhang J.	Chemosphere	10.1016/j.chemosphere.2021.130359
Perfluorooctane sulfonate (PFOS) enhanced polystyrene particles uptake by human colon adenocarcinoma Caco-2 cells	Liu Y, Shi Q, Liu X, Wang L, He Y, Tang J.	The Science of the total environment	10.1016/j.scitotenv.2022.157640
Perfluorooctane sulfonate (PFOS) exposure of bovine oocytes affects early embryonic development at human-relevant levels in an in vitro model	Hallberg I, Persson S, Olovsson M, Sirard MA, Damdimopoulou P, Rüegg J, Sjunnesson YCB.	Toxicology	10.1016/j.tox.2021.153028
Perfluorooctane sulfonate (PFOS) induces several behavioural defects in Caenorhabditis elegans that can also be transferred to the next generations	Chowdhury MI, Sana T, Panneerselvan L, Sivaram AK, Megharaj M.	Chemosphere	10.1016/j.chemosphere.2021.132896
Perfluorooctane Sulfonate (PFOS) Produces Dopaminergic Neuropathology in Caenorhabditis elegans	Sammi SR, Foguth RM, Nieves CS, De Perre C, Wipf P, McMurray CT, Lee LS, Cannon JR.	Toxicological sciences : an official journal of the Society of Toxicology	10.1093/toxsci/kfz191
Perfluorooctane sulfonate (PFOS), a novel environmental pollutant, induces liver injury in mice by activating hepatocyte ferroptosis	Yang Y, Xie L, Zhu Y, Sheng Y, Wang J, Zhou X, Li W, Cao C, Yang Y, Han C.	Ecotoxicology and environmental safety	10.1016/j.ecoenv.2023.115625
Perfluorooctane sulfonate affects mouse oocyte maturation in vitro by promoting oxidative stress and apoptosis induced bymitochondrial dysfunction	Wei KN, Wang XJ, Zeng ZC, Gu RT, Deng SZ, Jiang J, Xu CL, Li W, Wang HL.	Ecotoxicology and environmental safety	10.1016/j.ecoenv.2021.112807
Perfluorooctane sulfonate aggravates CCl4-induced hepatic fibrosis via HMGB1/TLR4/Smad signaling	Wan C, Gu T, Ling J, Qin Y, Luo J, Sun L, Hua L, Zhao J, Jiang S.	Environmental toxicology	10.1002/tox.23458
Perfluorooctane sulfonate alternatives and metabolic syndrome in adults: New evidence from the Isomers of C8 Health Project in China	Yu S, Feng WR, Liang ZM, Zeng XY, Bloom MS, Hu GC, Zhou Y, Ou YQ, Chu C, Li QQ, Yu Y, Zeng XW, Dong GH.	Environmental pollution (Barking, Essex : 1987)	10.1016/j.envpol.2021.117078
Perfluorooctane sulfonate alters gut microbiota-host metabolic homeostasis in mice	Zhang L, Rimal B, Nichols RG, Tian Y, Smith PB, Hatzakis E, Chang SC, Butenhoff JL, Peters JM, Patterson AD.	Toxicology	10.1016/j.tox.2020.152365
Perfluorooctane sulfonate and bisphenol A induce a similar level of mast cell activation via a common signaling pathway, Fyn-Lyn-Syk activation	Park SJ, Sim KH, Shrestha P, Yang JH, Lee YJ.	Food and chemical toxicology : an international journal published for the British Industrial Biological Research Association	10.1016/j.fct.2021.112478
Perfluorooctane sulfonate and perfluorooctanoic acid induce plasma membrane dysfunction in boar spermatozoa during in vitro capacitation	Ortiz-Sánchez PB, Roa-Espitia AL, Fierro R, López-Torres AS, Jiménez-Morales I, Oseguera-López I, Hernández-González EO, González-Márquez H.	Reproductive toxicology (Elmsford, N.Y.)	10.1016/j.reprotox.2022.03.013
Perfluorooctane sulfonate and perfluorooctanoic acid inhibit progesterone-responsive capacitation through cAMP/PKA signaling pathway and induce DNA damage in human sperm	Shan L, Chai Y, Gao T, Li K, Yu J, Liang F, Ni Y, Sun P.	Environmental toxicology and pharmacology	10.1016/j.etap.2023.104165
Perfluorooctane sulfonate continual exposure impairs glucose-stimulated insulin secretion via SIRT1-induced upregulation of UCP2 expression	Duan X, Sun W, Sun H, Zhang L.	Environmental pollution (Barking, Essex : 1987)	10.1016/j.envpol.2021.116840
Perfluorooctane sulfonate disrupts the blood brain barrier through the crosstalk between endothelial cells and astrocytes in mice	Yu Y, Wang C, Zhang X, Zhu J, Wang L, Ji M, Zhang Z, Ji XM, Wang SL.	Environmental pollution (Barking, Essex : 1987)	10.1016/j.envpol.2019.113429
Perfluorooctane sulfonate enhances mRNA expression of PPARγ and ap2 in human mesenchymal stem cells monitored by long-retained intracellular nanosensor	Gao Y, Guo X, Wang S, Chen F, Ren X, Xiao H, Wang L.	Environmental pollution (Barking, Essex : 1987)	10.1016/j.envpol.2020.114571
Perfluorooctane sulfonate exerts inflammatory bowel disease-like intestinal injury in rats	Liang H, Yang M, Zeng C, Wu W, Zhao L, Wang Y.	PeerJ	10.7717/peerj.10644
Perfluorooctane sulfonate exposure alters sexual behaviors and transcriptions of genes in hypothalamic-pituitary-gonadal-liver axis of male zebrafish (Danio rerio)	Bao M, Zheng S, Liu C, Huang W, Xiao J, Wu K.	Environmental pollution (Barking, Essex : 1987)	10.1016/j.envpol.2020.115585
Perfluorooctane Sulfonate in US Ambient Surface Waters: A Review of Occurrence in Aquatic Environments and Comparison to Global Concentrations	Jarvis AL, Justice JR, Elias MC, Schnitker B, Gallagher K.	Environmental toxicology and chemistry	10.1002/etc.5147
Perfluorooctane sulfonate induced toxicity in embryonic stem cell-derived cardiomyocytes via inhibiting autophagy-lysosome pathway	Liu D, Liu NY, Chen LT, Shao Y, Shi XM, Zhu DY.	Toxicology in vitro : an international journal published in association with BIBRA	10.1016/j.tiv.2020.104988
Perﬂuorooctane sulfonate induces apoptosis via activation of FoxO3a and upregulation of proapoptotic Bcl-2 proteins in PC12 cells	Wu P, Ding C, Yan M, Qian B, Wang W, Sun P, Zhao J.	The Journal of toxicological sciences	10.2131/jts.44.657
Perfluorooctane sulfonate induces autophagy-associated apoptosis through oxidative stress and the activation of extracellular signal-regulated kinases in renal tubular cells	Wen LL, Chen YT, Lee YG, Ko TL, Chou HC, Juan SH.	PloS one	10.1371/journal.pone.0245442
Perfluorooctane sulfonate induces heart toxicity involving cardiac apoptosis and inflammation in rats	Xu D, Li L, Tang L, Guo M, Yang J.	Experimental and therapeutic medicine	10.3892/etm.2021.10936
Perfluorooctane sulfonate interferes with non-genomic estrogen receptor signaling pathway, inhibits ERK1/2 activation and induces apoptosis in mouse spermatocyte-derived cells	Qu J, Han Y, Zhao Z, Wu Y, Lu Y, Chen G, Jiang J, Qiu L, Gu A, Wang X.	Toxicology	10.1016/j.tox.2021.152871
Perfluorooctane sulfonate promotes atherosclerosis by modulating M1 polarization of macrophages through the NF-κB pathway	Wang D, Tan Z, Yang J, Li L, Li H, Zhang H, Liu H, Liu Y, Wang L, Li Q, Guo H.	Ecotoxicology and environmental safety	10.1016/j.ecoenv.2022.114384
Perfluorooctane sulfonate promotes doxycycline-induced liver tumor progression in male Kras(v12) transgenic zebrafish	Zhu Y, Yang D, Duan X, Zhang Y, Chen D, Gong Z, Liu C.	Environmental research	10.1016/j.envres.2021.110962
Perfluorooctane sulfonate promotes hepatic lipid accumulation and steatosis in high-fat diet mice through AMP-activated protein kinase/acetyl-CoA carboxylase (AMPK/ACC) pathway	Ling J, Hua L, Qin Y, Gu T, Jiang S, Zhao J.	Journal of applied toxicology : JAT	10.1002/jat.4383
Perfluorooctane sulfonate promotes the migration of colorectal cancer cells by inducing epithelial-mesenchymal transition	Li F, Chen L, Peng BX, Lei Y, Li M, Guo LH.	Journal of environmental sciences (China)	10.1016/j.jes.2023.09.031
Perfluorooctane sulfonate-induced oxidative stress contributes to pancreatic β-cell apoptosis by inhibiting cyclic adenosine monophosphate pathway: Prevention by pentoxifylline	Elumalai S, Karunakaran U, Won KC, Chung SM, Moon JS.	Environmental pollution (Barking, Essex : 1987)	10.1016/j.envpol.2022.120959
Perfluorooctane sulfonates induces neurobehavioral changes and increases dopamine neurotransmitter levels in zebrafish larvae	Wu L, Dang Y, Liang LX, Gong YC, Zeeshan M, Qian Z, Geiger SD, Vaughn MG, Zhou Y, Li QQ, Chu C, Tan YW, Lin LZ, Liu RQ, Hu LW, Yang BY, Zeng XW, Yu Y, Dong GH.	Chemosphere	10.1016/j.chemosphere.2022.134234
Perfluorooctane sulfonic acid (PFOS) adsorbed to polyethylene microplastics: Accumulation and ecotoxicological effects in the clam Scrobicularia plana	Islam N, Garcia da Fonseca T, Vilke J, Gonçalves JM, Pedro P, Keiter S, Cunha SC, Fernandes JO, Bebianno MJ.	Marine environmental research	10.1016/j.marenvres.2020.105249
Perfluorooctane sulfonic acid (PFOS) exposure during pregnancy increases blood pressure and impairs vascular relaxation mechanisms in the adult offspring	Dangudubiyyam SV, Mishra JS, Zhao H, Kumar S.	Reproductive toxicology (Elmsford, N.Y.)	10.1016/j.reprotox.2020.09.008
Perfluorooctane Sulfonic Acid Disrupts Protective Tight Junction Proteins via Protein Kinase D in Airway Epithelial Cells	Lucas JH, Wang Q, Rahman I.	Toxicological sciences : an official journal of the Society of Toxicology	10.1093/toxsci/kfac096
Perfluorooctane sulfonic acid modulates expression of placental steroidogenesis-associated genes and hormone levels in pregnant rats	Dangudubiyyam SV, Mishra JS, Kumar S.	Reproductive toxicology (Elmsford, N.Y.)	10.1016/j.reprotox.2023.108390
Perfluorooctanesulfonate (PFOS) and perfluorooctanoic acid (PFOA) modify in vitro mitogen- and antigen-induced human peripheral blood mononuclear cell (PBMC) responses	Kasten-Jolly J, Lawrence DA.	Journal of toxicology and environmental health. Part A	10.1080/15287394.2022.2075816
Perfluorooctanesulfonate and perfluorooctanoate exacerbate airway inflammation in asthmatic mice and in vitro	Yang M, Li LY, Qin XD, Ye XY, Yu S, Bao Q, Sun L, Wang ZB, Bloom MS, Jalava P, Hu LW, Yu HY, Zeng XW, Yang BY, Dong GH, Li CW.	The Science of the total environment	10.1016/j.scitotenv.2020.142365
Perfluorooctanesulfonic acid (PFOS) administration shifts the hepatic proteome and augments dietary outcomes related to hepatic steatosis in mice	Marques E, Pfohl M, Auclair A, Jamwal R, Barlock BJ, Sammoura FM, Goedken M, Akhlaghi F, Slitt AL.	Toxicology and applied pharmacology	10.1016/j.taap.2020.115250
Perfluorooctanesulfonic acid (PFOS) and perfluorobutanesulfonic acid (PFBS) impaired reproduction and altered offspring physiological functions in Caenorhabditis elegans	Yue Y, Li S, Qian Z, Pereira RF, Lee J, Doherty JJ, Zhang Z, Peng Y, Clark JM, Timme-Laragy AR, Park Y.	Food and chemical toxicology : an international journal published for the British Industrial Biological Research Association	10.1016/j.fct.2020.111695
Perfluorooctanesulfonic Acid and Perfluorohexanesulfonic Acid Alter the Blood Lipidome and the Hepatic Proteome in a Murine Model of Diet-Induced Obesity	Pfohl M, Ingram L, Marques E, Auclair A, Barlock B, Jamwal R, Anderson D, Cummings BS, Slitt AL.	Toxicological sciences : an official journal of the Society of Toxicology	10.1093/toxsci/kfaa148
Perfluorooctanesulfonic Acid and Perfluorooctanoic Acid Promote Migration of Three-Dimensional Colorectal Cancer Spheroids	Zheng J, Sun B, Berardi D, Lu L, Yan H, Zheng S, Aladelokun O, Xie Y, Cai Y, Godri Pollitt KJ, Khan SA, Johnson CH.	Environmental science & technology	10.1021/acs.est.3c04844
Perfluorooctanesulfonic Acid-Induced Toxicity on Zebrafish Embryos in the Presence or Absence of the Chorion	Mylroie JE, Wilbanks MS, Kimble AN, To KT, Cox CS, McLeod SJ, Gust KA, Moore DW, Perkins EJ, Garcia-Reyero N.	Environmental toxicology and chemistry	10.1002/etc.4899
Perfluorooctanoic acid (PFOA) and hexafluoropropylene oxide-dimer acid (GenX): Hepatic stress and bile acid metabolism with different pathways	Yoo HJ, Pyo MC, Rhee KH, Lim JM, Yang SA, Yoo MK, Lee KW.	Ecotoxicology and environmental safety	10.1016/j.ecoenv.2023.115001
Perfluorooctanoic acid (PFOA) and perfluooctane sulfonate (PFOS) induce different modes of action in reproduction to Japanese medaka (Oryzias latipes)	Kang JS, Ahn TG, Park JW.	Journal of hazardous materials	10.1016/j.jhazmat.2019.01.034
Perfluorooctanoic acid (PFOA) and perfluorooctane sulfonate (PFOS) in water and edible fish species of Karun River, Ahvaz, Iran: spatial distribution, human health, and ecological risk assessment	Takdastan A, Babaei AA, Jorfi S, Ahmadi M, Tahmasebi Birgani Y, Jamshidi B.	International journal of environmental health research	10.1080/09603123.2023.2168630
Perfluorooctanoic Acid (PFOA) and Perfluorooctanesulfonic Acid (PFOS) in Surface Water of China: National Exposure Distributions and Probabilistic Risk Assessment	Li Q, Wang P, Hu B, Wang C, Li D.	Archives of environmental contamination and toxicology	10.1007/s00244-021-00837-z
Perfluorooctanoic acid (PFOA) as a stimulator of estrogen receptor-negative breast cancer MDA-MB-231 cell aggressiveness: Evidence for involvement of fatty acid 2-hydroxylase (FA2H) in the stimulated cell migration	Sakai G, Hirao-Suzuki M, Koga T, Kobayashi T, Kamishikiryo J, Tanaka M, Fujii K, Takiguchi M, Sugihara N, Toda A, Takeda S.	The Journal of toxicological sciences	10.2131/jts.47.159
Perfluorooctanoic acid (PFOA) caused oxidative stress and metabolic disorders in lettuce (Lactuca sativa) root	Li P, Li J.	The Science of the total environment	10.1016/j.scitotenv.2020.144726
Perfluorooctanoic acid (PFOA) exposure affects early embryonic development and offspring oocyte quality via inducing mitochondrial dysfunction	Zhou YT, Li R, Li SH, Ma X, Liu L, Niu D, Duan X.	Environment international	10.1016/j.envint.2022.107413
Perfluorooctanoic Acid (PFOA) Exposure Compromises Fertility by Affecting Ovarian and Oocyte Development	Zhang H, Han L, Qiu L, Zhao B, Gao Y, Chu Z, Dai X.	International journal of molecular sciences	10.3390/ijms25010136
Perfluorooctanoic acid (PFOA) exposure induces splenic atrophy via overactivation of macrophages in male mice	Guo H, Zhang H, Sheng N, Wang J, Chen J, Dai J.	Journal of hazardous materials	10.1016/j.jhazmat.2020.124862
Perfluorooctanoic acid (PFOA) exposure inhibits DNA methyltransferase activities and alters constitutive heterochromatin organization	Liu W, Irudayaraj J.	Food and chemical toxicology : an international journal published for the British Industrial Biological Research Association	10.1016/j.fct.2020.111358
Perfluorooctanoic Acid (PFOA) Incorporated into Iron Particles Promoted the Formation of Disinfection Byproducts under Drinking Water Conditions	Zhuang Y, Li D, Shi B.	Environmental science & technology	10.1021/acs.est.2c09372
Perfluorooctanoic acid (PFOA) inhibits steroidogenesis and mitochondrial function in bovine granulosa cells in vitro	Kabakci R, Clark KL, Plewes MR, Monaco CF, Davis JS.	Environmental pollution (Barking, Essex : 1987)	10.1016/j.envpol.2023.122698
Perfluorooctanoic acid (PFOA) inhibits the gap junction intercellular communication and induces apoptosis in human ovarian granulosa cells	Zhou Y, Li H, Lin C, Mao Y, Rao J, Lou Y, Yang X, Xu X, Jin F.	Reproductive toxicology (Elmsford, N.Y.)	10.1016/j.reprotox.2020.09.005
Perfluorooctanoic acid (PFOA), perfluorooctane sulfonic acid (PFOS), and perfluorononanoic acid (PFNA) increase triglyceride levels and decrease cholesterogenic gene expression in human HepaRG liver cells	Louisse J, Rijkers D, Stoopen G, Janssen A, Staats M, Hoogenboom R, Kersten S, Peijnenburg A.	Archives of toxicology	10.1007/s00204-020-02808-0
Perfluorooctanoic acid (PFOA)-induced alterations of biomolecules in the wetland plant Alismaorientale	Wang TT, Wang S, Shao S, Wang XD, Wang DY, Liu YS, Ge CJ, Ying GG, Chen ZB.	The Science of the total environment	10.1016/j.scitotenv.2022.153302
Perfluorooctanoic acid activates multiple nuclear receptor pathways and skews expression of genes regulating cholesterol homeostasis in liver of humanized PPARα mice fed an American diet	Schlezinger JJ, Puckett H, Oliver J, Nielsen G, Heiger-Bernays W, Webster TF.	Toxicology and applied pharmacology	10.1016/j.taap.2020.115204
Perfluorooctanoic acid activates the unfolded protein response in pancreatic acinar cells	Hocevar SE, Kamendulis LM, Hocevar BA.	Journal of biochemical and molecular toxicology	10.1002/jbt.22561
Perfluorooctanoic acid affects mouse brain and liver tissue through oxidative stress	Endirlik BÜ, Eken A, Canpınar H, Öztürk F, Gürbay A.	Arhiv za higijenu rada i toksikologiju	10.2478/aiht-2022-73-3629
Perfluorooctanoic Acid Affects Thyroid Follicles in Common Carp (Cyprinus carpio)	Manera M, Castaldelli G, Giari L.	International journal of environmental research and public health	10.3390/ijerph19159049
Perfluorooctanoic acid alternatives hexafluoropropylene oxides exert male reproductive toxicity by disrupting blood-testis barrier	Peng BX, Li F, Mortimer M, Xiao X, Ni Y, Lei Y, Li M, Guo LH.	The Science of the total environment	10.1016/j.scitotenv.2022.157313
Perfluorooctanoic acid alters progesterone activity in human endometrial cells and induces reproductive alterations in young women	Di Nisio A, Rocca MS, Sabovic I, De Rocco Ponce M, Corsini C, Guidolin D, Zanon C, Acquasaliente L, Carosso AR, De Toni L, Foresta C.	Chemosphere	10.1016/j.chemosphere.2019.125208
Perfluorooctanoic acid alters the developmental trajectory of female germ cells and embryos in rodents and its potential mechanism	Huang C, Wu D, Zhang K, Khan FA, Pandupuspitasari NS, Wang Y, Huo L, Sun F.	Ecotoxicology and environmental safety	10.1016/j.ecoenv.2022.113467
Perfluorooctanoic acid and perfluorooctane sulfonate co-exposure induced changes of metabolites and defense pathways in lettuce leaves	Li P, Oyang X, Xie X, Guo Y, Li Z, Xi J, Zhu D, Ma X, Liu B, Li J, Xiao Z.	Environmental pollution (Barking, Essex : 1987)	10.1016/j.envpol.2019.113512
Perfluorooctanoic acid and perfluorooctane sulfonic acid inhibit plant growth through the modulation of phytohormone signalling pathways: Evidence from molecular and genetic analysis in Arabidopsis	Zhang P, Sun L, Liu F, Gao Q, Wang R, Ju Q, Xu J.	The Science of the total environment	10.1016/j.scitotenv.2022.158287
Perfluorooctanoic acid and perfluorooctanesulfonic acid induce immunotoxicity through the NF-κB pathway in black-spotted frog (Rana nigromaculata)	Liu Z, Lin H, Zheng Y, Feng Y, Shi C, Zhu R, Shen X, Han Y, Zhang H, Zhong Y.	Chemosphere	10.1016/j.chemosphere.2022.137622
Perfluorooctanoic acid disrupts gap junction intercellular communication and induces reactive oxygen species formation and apoptosis in mouse ovaries	López-Arellano P, López-Arellano K, Luna J, Flores D, Jiménez-Salazar J, Gavia G, Teteltitla M, Rodríguez JJ, Domínguez A, Casas E, Bahena I, Betancourt M, González C, Ducolomb Y, Bonilla E.	Environmental toxicology	10.1002/tox.22661
Perfluorooctanoic Acid Disrupts Ovarian Steroidogenesis and Folliculogenesis in Adult Mice	Yang M, Lee Y, Gao L, Chiu K, Meling DD, Flaws JA, Warner GR.	Toxicological sciences : an official journal of the Society of Toxicology	10.1093/toxsci/kfac005
Perfluorooctanoic acid disrupts thyroid-specific genes expression and regulation via the TSH-TSHR signaling pathway in thyroid cells	Du Y, Chen C, Zhou G, Cai Z, Man Q, Liu B, Wang WC.	Environmental research	10.1016/j.envres.2023.117372
Perfluorooctanoic acid dominates the molecular-level effects of a mixture of equal masses of perfluorooctanoic acid and perfluorooctane sulfonic acid in earthworm	Han Z, Oyeyemi BF, Zenobio JE, Salawu OA, Adeleye AS.	Journal of hazardous materials	10.1016/j.jhazmat.2023.131718
Perfluorooctanoic acid exposure and its neurodegenerative consequences in C57BL6/J mice	Neisiani AK, Mousavi MK, Soltani M, Aliomrani M.	Naunyn-Schmiedeberg's archives of pharmacology	10.1007/s00210-023-02387-8
Perfluorooctanoic Acid Exposure Assessment on Common Carp Liver through Image and Ultrastructural Investigation	Manera M, Sayyaf Dezfuli B, Castaldelli G, DePasquale JA, Fano EA, Martino C, Giari L.	International journal of environmental research and public health	10.3390/ijerph16244923
Perfluorooctanoic acid exposure in early pregnancy induces oxidative stress in mice uterus and liver	Zhang Y, Zhang L, Bao J, Liu L, Wang X.	Environmental science and pollution research international	10.1007/s11356-021-15453-6
Perfluorooctanoic acid exposure in vivo perturbs mitochondrial metabolic during oocyte maturation	Zhang P, Qi C, Ma Z, Wang Y, Zhang L, Hou X.	Environmental toxicology	10.1002/tox.23652
Perfluorooctanoic acid exposure increases both proliferation and apoptosis of human placental trophoblast cells mediated by ER stress-induced ROS or UPR pathways	Du Y, Cai Z, Zhou G, Liang W, Man Q, Wang W.	Ecotoxicology and environmental safety	10.1016/j.ecoenv.2022.113508
Perfluorooctanoic acid exposure induces apoptosis in SMMC-7721 hepatocellular cancer cells	Lv D, Gu Y, Guo M, Hou P, Li Y, Wu R.	Environmental pollution (Barking, Essex : 1987)	10.1016/j.envpol.2019.01.035
Perfluoro-octanoic acid impairs sperm motility through the alteration of plasma membrane	Šabović I, Cosci I, De Toni L, Ferramosca A, Stornaiuolo M, Di Nisio A, Dall'Acqua S, Garolla A, Foresta C.	Journal of endocrinological investigation	10.1007/s40618-019-01152-0
Perfluorooctanoic acid induces behavioral impairment and oxidative injury in Nauphoeta cinerea nymphs	Adedara IA, Abioye OO, Oyedele GT, Ikeji CN, Afolabi BA, Rocha JBT, Farombi EO.	Environmental science and pollution research international	10.1007/s11356-023-30156-w
Perfluorooctanoic acid induces cell death in TM3 cells via the ER stress-mitochondrial apoptosis pathway	Han JW, Park HJ.	Reproductive toxicology (Elmsford, N.Y.)	10.1016/j.reprotox.2023.108383
Perfluorooctanoic acid induces cytotoxicity in spermatogonial GC-1 cells	Lin T, Zhang Y, Ding X, Huang T, Zhang W, Zou W, Kuang H, Yang B, Wu L, Zhang D.	Chemosphere	10.1016/j.chemosphere.2020.127545
Perfluorooctanoic acid induces hepatocellular endoplasmic reticulum stress and mitochondrial-mediated apoptosis in vitro via endoplasmic reticulum-mitochondria communication	Wang Q, Chen W, Zhang B, Gao Z, Zhang Q, Deng H, Han L, Shen XL.	Chemico-biological interactions	10.1016/j.cbi.2022.109844
Perfluorooctanoic acid induces liver and serum dyslipidemia in humanized PPARα mice fed an American diet	Schlezinger JJ, Hyötyläinen T, Sinioja T, Boston C, Puckett H, Oliver J, Heiger-Bernays W, Webster TF.	Toxicology and applied pharmacology	10.1016/j.taap.2021.115644
Perfluorooctanoic acid induces tight junction injury of Sertoli cells by blocking autophagic flux	Yang Y, Fu G, Zhao X, Wu X, Zhu K, Liu S, Yuan D, Wu J, Wang T, Zhang C, Zhao H.	Food and chemical toxicology : an international journal published for the British Industrial Biological Research Association	10.1016/j.fct.2023.113649
Perfluorooctanoic acid induces transcriptomic alterations in second trimester human cytotrophoblasts	Chen H, Kapidzic M, Gantar D, Aksel S, Levan J, Abrahamsson DP, Jigmeddagva U, Basrai S, San A, Gaw SL, Woodruff TJ, Fisher SJ, Robinson JF.	Toxicological sciences : an official journal of the Society of Toxicology	10.1093/toxsci/kfad097
Perfluorooctanoic acid inhibits androgen biosynthesis in rat immature Leydig cells	Zhang D, Hu J, Li H.	Environmental toxicology	10.1002/tox.24042
Perfluorooctanoic acid inhibits the maturation rate of mouse oocytes cultured in vitro by triggering mitochondrial and DNA damage	Guo C, Zhao Z, Zhao K, Huang J, Ding L, Huang X, Meng L, Li L, Wei H, Zhang S.	Birth defects research	10.1002/bdr2.1899
Perfluorooctanoic acid promotes proliferation of the human granulosa cell line HGrC1 and alters expression of cell cycle genes and Hippo pathway effector YAP1	Clark KL, George JW, Hua G, Davis JS.	Reproductive toxicology (Elmsford, N.Y.)	10.1016/j.reprotox.2022.03.011
Perfluorooctanoic Acid Promotes Recruitment and Exocytosis of Rodlet Cells in the Renal Hematopoietic Tissue of Common Carp	Manera M, Castaldelli G, Giari L.	Toxics	10.3390/toxics11100831
Perfluorooctanoic acid suppresses sperm functions via abnormal Protein Kinase B activation during capacitation	Jang SI, Jo JH, Jung EJ, Lee WJ, Hwang JM, Bae JW, Shin S, Lee SI, Kim MO, Kwon WS.	Reproductive toxicology (Elmsford, N.Y.)	10.1016/j.reprotox.2023.108528
Perfluorooctanoic acid-induced cellular and subcellular alterations in fish hepatocytes	Manera M, Castaldelli G, Fano EA, Giari L.	Environmental toxicology and pharmacology	10.1016/j.etap.2020.103548
Perfluorooctanoic acid-induced developmental cardiotoxicity in chicken embryo: Roles of miR-490-5p	Guo Y, Yuan J, Ni H, Ji J, Zhong S, Zheng Y, Jiang Q.	Environmental pollution (Barking, Essex : 1987)	10.1016/j.envpol.2022.120022
Perfluorooctanoic acid-induced immunotoxicity via NF-kappa B pathway in zebrafish (Danio rerio) kidney	Zhang H, Shen L, Fang W, Zhang X, Zhong Y.	Fish & shellfish immunology	10.1016/j.fsi.2021.03.004
Perfluorooctanoic acid-induced liver injury is potentially associated with gut microbiota dysbiosis	Wang G, Pan R, Liang X, Wu X, Wu Y, Zhang H, Zhao J, Chen W.	Chemosphere	10.1016/j.chemosphere.2020.129004
Perfluorooctanoic acid-induced metabolic disorder via enhancing metabolism of glutamine and fatty acids in human intestinal cells	Zhang R, Lu W, Tu L, Lin Y, Sun J, Chen B, Luan T.	Environmental pollution (Barking, Essex : 1987)	10.1016/j.envpol.2023.122684
Perfluorooctanoic acid-induced toxicities in chicken embryo primary cardiomyocytes: Roles of PPAR alpha and Wnt5a/Frizzled2	Lv N, Yuan J, Ji A, Shi L, Gao M, Cui L, Jiang Q.	Toxicology and applied pharmacology	10.1016/j.taap.2019.114716
Perfluoropolyether carboxylic acids (novel alternatives to PFOA) impair zebrafish posterior swim bladder development via thyroid hormone disruption	Wang J, Shi G, Yao J, Sheng N, Cui R, Su Z, Guo Y, Dai J.	Environment international	10.1016/j.envint.2019.105317
Perinatal exposure to endocrine disrupting chemicals and neurodevelopment: How articles of daily use influence the development of our children	O'Shaughnessy KL, Fischer F, Zenclussen AC.	Best practice & research. Clinical endocrinology & metabolism	10.1016/j.beem.2021.101568
Persistent endocrine-disrupting chemicals found in human follicular fluid stimulate the proliferation of granulosa tumor spheroids via GPR30 and IGF1R but not via the classic estrogen receptors	Gogola J, Hoffmann M, Ptak A.	Chemosphere	10.1016/j.chemosphere.2018.11.018
Persistent organic pollutant exposure and celiac disease: A pilot study	Gaylord A, Trasande L, Kannan K, Thomas KM, Lee S, Liu M, Levine J.	Environmental research	10.1016/j.envres.2020.109439
Persistent organic pollutants and couple fecundability: a systematic review	Kahn LG, Harley KG, Siegel EL, Zhu Y, Factor-Litvak P, Porucznik CA, Klein-Fedyshin M, Hipwell AE; program collaborators for Environmental Influences on Child Health Outcomes Program.	Human reproduction update	10.1093/humupd/dmaa037
Persistent organic pollutants and gestational diabetes: A multi-center prospective cohort study of healthy US women	Rahman ML, Zhang C, Smarr MM, Lee S, Honda M, Kannan K, Tekola-Ayele F, Buck Louis GM.	Environment international	10.1016/j.envint.2019.01.027
Persistent organic pollutants and β-cell toxicity: a comprehensive review	Hoyeck MP, Matteo G, MacFarlane EM, Perera I, Bruin JE.	American journal of physiology. Endocrinology and metabolism	10.1152/ajpendo.00358.2021
Persistent oxidative injury and neurobehavioral impairment in adult male and female Nauphoeta cinerea exposed to perfluorooctanoic acid	Babalola AA, Mohammed KA, Olaseni AA, Oyedele GT, Adedara IA, Rocha JBT, Farombi EO.	Environmental toxicology and pharmacology	10.1016/j.etap.2023.104135
Perspective on halogenated organic compounds	Kodavanti PRS, Costa LG, Aschner M.	Advances in neurotoxicology	10.1016/bs.ant.2023.06.001
Perturbation of IP3R-dependent endoplasmic reticulum calcium homeostasis by PPARδ-activated metabolic stress leads to mouse spermatocyte apoptosis: A direct mechanism for perfluorooctane sulfonic acid-induced spermatogenic disorders	Yang W, Ling X, He S, Cui H, Wang L, Yang Z, An H, Zou P, Chen Q, Sun L, Yang H, Liu J, Cao J, Ao L.	Environmental pollution (Barking, Essex : 1987)	10.1016/j.envpol.2023.123167
Perturbation of the gut microbiome in wild-caught freshwater turtles (Emydura macquarii macquarii) exposed to elevated PFAS levels	Beale DJ, Bissett A, Nilsson S, Bose U, Nelis JLD, Nahar A, Smith M, Gonzalez-Astudillo V, Braun C, Baddiley B, Vardy S.	The Science of the total environment	10.1016/j.scitotenv.2022.156324
PFAS accumulation in several terrestrial plant and invertebrate species reveals species-specific differences	Groffen T, Prinsen E, Devos Stoffels OA, Maas L, Vincke P, Lasters R, Eens M, Bervoets L.	Environmental science and pollution research international	10.1007/s11356-022-23799-8
PFAS adsorbent selection: The role of adsorbent use rate, water quality, and cost	Murray CC, Safulko A, Vatankhah H, Liu CJ, Tajdini B, Marshall RE, Bellona C.	Journal of hazardous materials	10.1016/j.jhazmat.2023.131481
PFAS and Dissolved Organic Carbon Enrichment in Surface Water Foams on a Northern U.S. Freshwater Lake	Schwichtenberg T, Bogdan D, Carignan CC, Reardon P, Rewerts J, Wanzek T, Field JA.	Environmental science & technology	10.1021/acs.est.0c05697
PFAS Biotransformation Pathways: A Species Comparison Study	Kolanczyk RC, Saley MR, Serrano JA, Daley SM, Tapper MA.	Toxics	10.3390/toxics11010074
PFAS Environmental Pollution and Antioxidant Responses: An Overview of the Impact on Human Field	Bonato M, Corrà F, Bellio M, Guidolin L, Tallandini L, Irato P, Santovito G.	International journal of environmental research and public health	10.3390/ijerph17218020
PFAS health effects database: Protocol for a systematic evidence map	Pelch KE, Reade A, Wolffe TAM, Kwiatkowski CF.	Environment international	10.1016/j.envint.2019.05.045
PFAS Molecules: A Major Concern for the Human Health and the Environment	Panieri E, Baralic K, Djukic-Cosic D, Buha Djordjevic A, Saso L.	Toxics	10.3390/toxics10020044
PFAS pollution threatens ecosystems worldwide	Sonne C, Bank MS, Jenssen BM, Cieseielski TM, Rinklebe J, Lam SS, Hansen M, Bossi R, Gustavson K, Dietz R.	Science (New York, N.Y.)	10.1126/science.adh0934
PFAS removal by ion exchange resins: A review	Dixit F, Dutta R, Barbeau B, Berube P, Mohseni M.	Chemosphere	10.1016/j.chemosphere.2021.129777
PFAS surveillance in abiotic matrices within vital aquatic habitats throughout Florida	Griffin EK, Hall LM, Brown MA, Taylor-Manges A, Green T, Suchanec K, Furman BT, Congdon VM, Wilson SS, Osborne TZ, Martin S, Schultz EA, Lukacsa DT, Greenberg JA, Bowden JA.	Marine pollution bulletin	10.1016/j.marpolbul.2023.115011
PFAS, bisphenol, and paraben in Malaysian food and estimated dietary intake	Mohamad Haron DE, Yoneda M, Ahmad ED, Aziz MY.	Food additives & contaminants. Part B, Surveillance	10.1080/19393210.2023.2188611
PFAS-induced lipidomic dysregulations and their associations with developmental toxicity in zebrafish embryos	Yang Z, Fu L, Cao M, Li F, Li J, Chen Z, Guo A, Zhong H, Li W, Liang Y, Luo Q.	The Science of the total environment	10.1016/j.scitotenv.2022.160691
PFASs-restriction proposal commentary on ECHA's Annex XV restriction report, proposal for a restriction, March 2023	Wollin KM, Batke M, Damm G, Freyberger A, Gundert-Remy U, Mangerich A, Hengstler JG, Partosch F, Schupp T, Sonnenburg A, Foth H.	Archives of toxicology	10.1007/s00204-023-03597-y
PFO5DoDA disrupts hepatic homeostasis primarily through glucocorticoid signaling inhibition	Wang C, Fu H, Yang J, Liu L, Zhang F, Yang C, Li H, Chen J, Li Q, Wang X, Ye Y, Sheng N, Guo Y, Dai J, Xu G, Liu X, Wang J.	Journal of hazardous materials	10.1016/j.jhazmat.2023.130831
PFOA and PFOS interact with superoxide dismutase and induce cytotoxicity in mouse primary hepatocytes: A combined cellular and molecular methods	Xu M, Wan J, Niu Q, Liu R.	Environmental research	10.1016/j.envres.2019.05.008
PFOA and PFOS promote diabetic renal injury in vitro by impairing the metabolisms of amino acids and purines	Gong X, Yang C, Hong Y, Chung ACK, Cai Z.	The Science of the total environment	10.1016/j.scitotenv.2019.04.208
PFOA evokes extracellular Ca(2+) influx and compromises progesterone-induced response in human sperm	Yuan Y, Ding X, Cheng Y, Kang H, Luo T, Zhang X, Kuang H, Chen Y, Zeng X, Zhang D.	Chemosphere	10.1016/j.chemosphere.2019.125074
PFOA exposure induces aberrant glucose and lipid metabolism in the rat liver through the AMPK/mTOR pathway	Zhang X, Ren X, Sun W, Griffin N, Wang L, Liu H.	Toxicology	10.1016/j.tox.2023.153551
PFOA induces alteration in DNA methylation regulators and SARS-CoV-2 targets Ace2 and Tmprss2 in mouse lung tissues	Ahmad S, Wen Y, Irudayaraj JMK.	Toxicology reports	10.1016/j.toxrep.2021.11.014
PFOA regulate adenosine receptors and downstream concentration-response cAMP-PKA pathway revealed by integrated omics and molecular dynamics analyses	Li X, Chen L, Zhou H, Wang J, Zhao C, Pang X.	The Science of the total environment	10.1016/j.scitotenv.2021.149910
PFOA-Induced Ovotoxicity Differs Between Lean and Obese Mice With Impacts on Ovarian Reproductive and DNA Damage Sensing and Repair Proteins	Estefanía González-Alvarez M, Severin A, Sayadi M, Keating AF.	Toxicological sciences : an official journal of the Society of Toxicology	10.1093/toxsci/kfac104
PFOS and F-53B disrupted inner cell mass development in mouse preimplantation embryo	Qiu Y, Gao M, Cao T, Wang J, Luo M, Liu S, Zeng X, Huang J.	Chemosphere	10.1016/j.chemosphere.2023.140948
PFOS dominates PFAS composition in ambient fine particulate matter (PM(2.5)) collected across North Carolina nearly 20 years after the end of its US production	Zhou J , Baumann K , Mead RN , Skrabal SA , Kieber RJ , Avery GB , Shimizu M , DeWitt JC , Sun M , Vance SA , Bodnar W , Zhang Z , Collins LB , Surratt JD , Turpin BJ .	Environmental science. Processes & impacts	10.1039/d0em00497a
PFOS exposure destroys the integrity of the blood-testis barrier (BTB) through PI3K/AKT/mTOR-mediated autophagy	Chen Z, Chen Z, Gao S, Shi J, Li X, Sun F.	Reproductive biology	10.1016/j.repbio.2023.100846
PFOS facilitates liver inflammation and steatosis: An involvement of NLRP3 inflammasome-mediated hepatocyte pyroptosis	Qin Y, Gu T, Ling J, Luo J, Zhao J, Hu B, Hua L, Wan C, Jiang S.	Journal of applied toxicology : JAT	10.1002/jat.4258
PFOS Inhibited Normal Functional Development of Placenta Cells via PPARγ Signaling	Li J, Quan X, Lei S, Huang Z, Wang Q, Xu P.	Biomedicines	10.3390/biomedicines9060677
PFOS mediates immunomodulation in an avian cell line that can be mitigated via a virus infection	Castaño-Ortiz JM, Jaspers VLB, Waugh CA.	BMC veterinary research	10.1186/s12917-019-1953-2
PFOS Modulates Interactive Epigenetic Regulation in First-Trimester Human Trophoblast Cell Line HTR-8/SV(neo)	Sonkar R, Kay MK, Choudhury M.	Chemical research in toxicology	10.1021/acs.chemrestox.9b00198
PFOS, PFOA, estrogen homeostasis, and birth size in Chinese infants	Wang H, Du H, Yang J, Jiang H, O K, Xu L, Liu S, Yi J, Qian X, Chen Y, Jiang Q, He G.	Chemosphere	10.1016/j.chemosphere.2019.01.061
PFOS-induced dyslipidemia and impaired cholinergic neurotransmission in developing zebrafish: Insight into its mechanisms	Mahapatra A, Gupta P, Suman A, Ray SS, Singh RK.	Neurotoxicology and teratology	10.1016/j.ntt.2023.107304
PFOS-induced placental cell growth inhibition is partially mediated by lncRNA H19 through interacting with miR-19a and miR-19b	Li J, Quan XJ, Chen G, Hong JW, Wang Q, Xu LL, Wang BH, Yu ZH, Yu HM.	Chemosphere	10.1016/j.chemosphere.2020.127640
PFOS-induced thyroid hormone system disrupted rats display organ-specific changes in their transcriptomes	Davidsen N, Ramhøj L, Lykkebo CA, Kugathas I, Poulsen R, Rosenmai AK, Evrard B, Darde TA, Axelstad M, Bahl MI, Hansen M, Chalmel F, Licht TR, Svingen T.	Environmental pollution (Barking, Essex : 1987)	10.1016/j.envpol.2022.119340
Pharmacokinetic bias analysis of an association between clinical thyroid disease and two perfluoroalkyl substances	Dzierlenga MW, Allen BC, Clewell HJ 3rd, Longnecker MP.	Environment international	10.1016/j.envint.2020.105784
Pharmacokinetic profile of Perfluorobutane Sulfonate and activation of hepatic nuclear receptor target genes in mice	Lau C, Rumpler J, Das KP, Wood CR, Schmid JE, Strynar MJ, Wambaugh JF.	Toxicology	10.1016/j.tox.2020.152522
Phosphorus conditions change the cellular responses of Microcystis aeruginosa to perfluorooctanoic acid	Wu H, Zhang W, Huang X, Gu P, Li Q, Luo X, Zheng Z.	The Science of the total environment	10.1016/j.scitotenv.2023.166707
Photochemical transformation of perfluoroalkyl acid precursors in water using engineered nanomaterials	Dai Y, Guo X, Wang S, Yin L, Hoffmann MR.	Water research	10.1016/j.watres.2020.115964
Photodynamic Priming Overcomes Per- and Polyfluoroalkyl Substance (PFAS)-Induced Platinum Resistance in Ovarian Cancer(†)	Rickard BP, Tan X, Fenton SE, Rizvi I.	Photochemistry and photobiology	10.1111/php.13728
Physical activity modifies the relation between gestational perfluorooctanoic acid exposure and adolescent cardiometabolic risk	Braun JM, Papandonatos GD, Li N, Sears CG, Buckley JP, Cecil KM, Chen A, Eaton CB, Kalkwarf HJ, Kelsey KT, Lanphear BP, Yolton K.	Environmental research	10.1016/j.envres.2022.114021
Physical, chemical, and microbial contaminants in food waste management for soil application: A review	O'Connor J, Mickan BS, Siddique KHM, Rinklebe J, Kirkham MB, Bolan NS.	Environmental pollution (Barking, Essex : 1987)	10.1016/j.envpol.2022.118860
Physiological and transcriptomic effects of hexafluoropropylene oxide dimer acid in Caenorhabditis elegans during development	Feng Z, McLamb F, Vu JP, Gong S, Gersberg RM, Bozinovic G.	Ecotoxicology and environmental safety	10.1016/j.ecoenv.2022.114047
Physiological effects of PFAS exposure in seabird chicks: A multi-species study of thyroid hormone triiodothyronine, body condition and telomere length in South Western France	Sebastiano M, Jouanneau W, Blévin P, Angelier F, Parenteau C, Pallud M, Ribout C, Gernigon J, Lemesle JC, Robin F, Pardon P, Budzinski H, Labadie P, Chastel O.	The Science of the total environment	10.1016/j.scitotenv.2023.165920
Physiologically based pharmacokinetic (PBPK) modeling of perfluorohexane sulfonate (PFHxS) in humans	Sweeney LM.	Regulatory toxicology and pharmacology : RTP	10.1016/j.yrtph.2021.105099
Phytotoxicity and oxidative stress of perfluorooctanesulfonate to two riparian plants: Acorus calamus and Phragmites communis	Qian J, Lu B, Chen H, Wang P, Wang C, Li K, Tian X, Jin W, He X, Chen H.	Ecotoxicology and environmental safety	10.1016/j.ecoenv.2019.04.078
Phytotoxicity induced by perfluorooctanoic acid and perfluorooctane sulfonate via metabolomics	Li P, Oyang X, Xie X, Li Z, Yang H, Xi J, Guo Y, Tian X, Liu B, Li J, Xiao Z.	Journal of hazardous materials	10.1016/j.jhazmat.2019.121852
Pilot-Scale Thermal Destruction of Per- and Polyfluoroalkyl Substances in a Legacy Aqueous Film Forming Foam	Shields EP, Krug JD, Roberson WR, Jackson SR, Smeltz MG, Allen MR, Preston Burnette R, Nash JT, Virtaranta L, Preston W, Liberatore HK, Ariel Geer Wallace M, Ryan JV, Kariher PH, Lemieux PM, Linak WP.	ACS ES&T engineering	10.1021/acsestengg.3c00098
Planktonic microbial responses to perfluorinated compound (PFC) pollution: Integrating PFC distributions with community coalescence and metabolism	Wu JY, Hua ZL, Gu L.	The Science of the total environment	10.1016/j.scitotenv.2021.147743
Plant responses to per- and polyfluoroalkyl substances (PFAS): a molecular perspective	Karamat A, Tehrani R, Foster GD, Van Aken B.	International journal of phytoremediation	10.1080/15226514.2023.2232874
Plant rhizosphere defense system respond differently to emerging polyfluoroalkyl substances F-53B and PFOS stress	Lu B, Qian J, Hu J, Huang Y, Wang P, Shen J, He Y, Tang S, Liu Y, Zhang Y.	Journal of hazardous materials	10.1016/j.jhazmat.2022.130119
Plant Uptake of Per- and Polyfluoroalkyl Acids under a Maximum Bioavailability Scenario	Lasee S, Subbiah S, Thompson WA, Karnjanapiboonwong A, Jordan J, Payton P, Anderson TA.	Environmental toxicology and chemistry	10.1002/etc.4571
Plasma concentrations of perfluoroalkyl substances and risk of inflammatory bowel diseases in women: A nested case control analysis in the Nurses' Health Study cohorts	Lochhead P, Khalili H, Ananthakrishnan AN, Burke KE, Richter JM, Sun Q, Grandjean P, Chan AT.	Environmental research	10.1016/j.envres.2021.112222
Plasma levels of per- and polyfluoroalkyl substances (PFAS) are associated with altered levels of proteins previously linked to inflammation, metabolism and cardiovascular disease	Dunder L, Salihovic S, Lind PM, Elmståhl S, Lind L.	Environment international	10.1016/j.envint.2023.107979
Plasma metabolites associated with exposure to perfluoroalkyl substances and risk of type 2 diabetes - A nested case-control study	Schillemans T, Shi L, Donat-Vargas C, Hanhineva K, Tornevi A, Johansson I, Koponen J, Kiviranta H, Rolandsson O, Bergdahl IA, Landberg R, Åkesson A, Brunius C.	Environment international	10.1016/j.envint.2020.106180
Plasma Protein Binding Evaluations of Per- and Polyfluoroalkyl Substances for Category-Based Toxicokinetic Assessment	Smeltz M, Wambaugh JF, Wetmore BA.	Chemical research in toxicology	10.1021/acs.chemrestox.3c00003
Plasma, liver, and kidney exposures in rats after oral doses of industrial chemicals predicted using physiologically based pharmacokinetic models: A case study of perﬂuorooctane sulfonic acid	Kamiya Y, Yanagi M, Hina S, Shigeta K, Miura T, Yamazaki H.	The Journal of toxicological sciences	10.2131/jts.45.763
Polanyi adsorption potential theory for estimating PFAS treatment with granular activated carbon	Burkhardt JB, Cadwallader A, Pressman JG, Magnuson ML, Williams AJ, Sinclair G, Speth TF.	Journal of water process engineering	10.1016/j.jwpe.2023.103691
Poly- and per-fluoroalkyl compounds in sediments of the Laurentian Great Lakes: Loadings, temporal trends, and sources determined by positive matrix factorization	Christensen ER, Zhang R, Codling G, Giesy JP, Li A.	Environmental pollution (Barking, Essex : 1987)	10.1016/j.envpol.2019.113166
Poly- and Perfluoroalkyl Substances (PFAS): Do They Matter to Aquatic Ecosystems?	Nayak S, Sahoo G, Das II, Mohanty AK, Kumar R, Sahoo L, Sundaray JK.	Toxics	10.3390/toxics11060543
Poly- and Perfluoroalkyl Substances Induce Immunotoxicity via the TLR Pathway in Zebrafish: Links to Carbon Chain Length	Tang L, Qiu W, Zhang S, Wang J, Yang X, Xu B, Magnuson JT, Xu EG, Wu M, Zheng C.	Environmental science & technology	10.1021/acs.est.2c09716
Polybrominated diphenyl ether (PBDE) and poly- and perfluoroalkyl substance (PFAS) exposures during pregnancy and maternal depression	Vuong AM, Yolton K, Braun JM, Sjodin A, Calafat AM, Xu Y, Dietrich KN, Lanphear BP, Chen A.	Environment international	10.1016/j.envint.2020.105694
Polychlorinated dioxins and dibenzofurans (PCDD/F), polybrominated dioxins and dibenzofurans (PBDD/F), polychlorinated biphenyls (PCB), polybrominated diphenyl ethers (PBDE), and per- and polyfluoroalkyl substances (PFAS) in German breast milk samples (LUPE 8)	Fromme H, Fuchs V, Albrecht M, Aschenbrenner B, Röhl C, Janitzki N, Herber-Jonat S, Wöckner M, Völkel W, Flemmer AW, Schober W.	The Science of the total environment	10.1016/j.scitotenv.2022.154066
Polyfluoroalkyl phosphate esters (PAPs) as PFAS substitutes and precursors: An overview	Ao J, Tang W, Liu X, Ao Y, Zhang Q, Zhang J.	Journal of hazardous materials	10.1016/j.jhazmat.2023.133018
Postpartum Fitness and Body Mass Index Changes in Active Duty Navy Women	Rogers AE, Khodr ZG, Bukowinski AT, Conlin AMS, Faix DJ, Garcia SMS.	Military medicine	10.1093/milmed/usz168
Potency Ranking of Per- and Polyfluoroalkyl Substances Using High-Throughput Transcriptomic Analysis of Human Liver Spheroids	Reardon AJF, Rowan-Carroll A, Ferguson SS, Leingartner K, Gagne R, Kuo B, Williams A, Lorusso L, Bourdon-Lacombe JA, Carrier R, Moffat I, Yauk CL, Atlas E.	Toxicological sciences : an official journal of the Society of Toxicology	10.1093/toxsci/kfab102
Potential-Driven Electron Transfer Lowers the Dissociation Energy of the C-F Bond and Facilitates Reductive Defluorination of Perfluorooctane Sulfonate (PFOS)	Su Y, Rao U, Khor CM, Jensen MG, Teesch LM, Wong BM, Cwiertny DM, Jassby D.	ACS applied materials & interfaces	10.1021/acsami.9b10449
PPARα/ACOX1 as a novel target for hepatic lipid metabolism disorders induced by per- and polyfluoroalkyl substances: An integrated approach	Yang W, Ling X, He S, Cui H, Yang Z, An H, Wang L, Zou P, Chen Q, Liu J, Ao L, Cao J.	Environment international	10.1016/j.envint.2023.108138
Practical application guide for the discovery of novel PFAS in environmental samples using high resolution mass spectrometry	Strynar M, McCord J, Newton S, Washington J, Barzen-Hanson K, Trier X, Liu Y, Dimzon IK, Bugsel B, Zwiener C, Munoz G.	Journal of exposure science & environmental epidemiology	10.1038/s41370-023-00578-2
Practical Semiquantification Strategy for Estimating Suspect Per- and Polyfluoroalkyl Substance (PFAS) Concentrations	Cao D, Schwichtenberg T, Duan C, Xue L, Muensterman D, Field J.	Journal of the American Society for Mass Spectrometry	10.1021/jasms.3c00019
Preconception exposure to perfluoroalkyl and polyfluoroalkyl substances and couple fecundity: A couple-based exploration	Luo K, Liu X, Zhou W, Nian M, Qiu W, Yang Y, Zhang J; Shanghai Birth Cohort.	Environment international	10.1016/j.envint.2022.107567
Predicting Concentration- and Ionic-Strength-Dependent Air-Water Interfacial Partitioning Parameters of PFASs Using Quantitative Structure-Property Relationships (QSPRs)	Stults JF, Choi YJ, Rockwell C, Schaefer CE, Nguyen DD, Knappe DRU, Illangasekare TH, Higgins CP.	Environmental science & technology	10.1021/acs.est.2c07316
Predicting Dose-Dependent Carcinogenicity of Chemical Mixtures Using a Novel Hybrid Neural Network Framework and Mathematical Approach	Limbu S, Dakshanamurthy S.	Toxics	10.3390/toxics11070605
Predicting Groundwater PFOA Exposure Risks with Bayesian Networks: Empirical Impact of Data Preprocessing on Model Performance	Li R, Gibson JM.	Environmental science & technology	10.1021/acs.est.3c00348
Predicting molecular docking of per- and polyfluoroalkyl substances to blood protein using generative artificial intelligence algorithm DiffDock	B Fortela DL, Mikolajczyk AP, Carnes MR, Sharp W, Revellame E, Hernandez R, Holmes WE, Zappi ME.	BioTechniques	10.2144/btn-2023-0070
Predicting the effects of per- and polyfluoroalkyl substance mixtures on peroxisome proliferator-activated receptor alpha activity in vitro	Nielsen G, Heiger-Bernays WJ, Schlezinger JJ, Webster TF.	Toxicology	10.1016/j.tox.2021.153024
Predicting the relationship between PFAS component signatures in water and non-water phases through mathematical transformation: Application to machine learning classification	Kibbey TCG, Jabrzemski R, O'Carroll DM.	Chemosphere	10.1016/j.chemosphere.2021.131097
Predicting the risk of GenX contamination in private well water using a machine-learned Bayesian network model	Roostaei J, Colley S, Mulhern R, May AA, Gibson JM.	Journal of hazardous materials	10.1016/j.jhazmat.2021.125075
Prediction of maternal and foetal exposures to perfluoroalkyl compounds in a Spanish birth cohort using toxicokinetic modelling	Brochot C, Casas M, Manzano-Salgado C, Zeman FA, Schettgen T, Vrijheid M, Bois FY.	Toxicology and applied pharmacology	10.1016/j.taap.2019.114640
Prediction of perfluoroalkyl acids (PFAAs) in homegrown eggs: Insights into abiotic and biotic factors affecting bioavailability and derivation of potential remediation measures	Lasters R, Van Sundert K, Groffen T, Buytaert J, Eens M, Bervoets L.	Environment international	10.1016/j.envint.2023.108300
Predictions of PFAS regional-scale atmospheric deposition and ambient air exposure	D'Ambro EL, Murphy BN, Bash JO, Gilliam RC, Pye HOT.	The Science of the total environment	10.1016/j.scitotenv.2023.166256
Pre-differentiation exposure of PFOA induced persistent changes in DNA methylation and mitochondrial morphology in human dopaminergic-like neurons	Zhao H, Xie J, Wu S, Sánchez OF, Zhang X, Freeman JL, Yuan C.	Environmental pollution (Barking, Essex : 1987)	10.1016/j.envpol.2022.119684
Preferential Retention and Transport of Perfluorooctanesulfonic Acid in a Dolomite Aquifer	Jahn KL, Lincoln SA, Freeman KH, Saffer DM.	Ground water	10.1111/gwat.13255
Prefertilization Exposure of Rainbow Trout Eggs to Per- and Polyfluoroalkyl Substances to Simulate Accumulation During Oogenesis	Raine JC, Su S, Lin E, Yang ZL, Giesy JP, Jones PD.	Environmental toxicology and chemistry	10.1002/etc.5200
Preliminary study on the distribution of metals and persistent organic pollutants (POPs), including perfluoroalkylated acids (PFAS), in the aquatic environment near Morogoro, Tanzania, and the potential health risks for humans	Groffen T, Rijnders J, van Doorn L, Jorissen C, De Borger SM, Luttikhuis DO, de Deyn L, Covaci A, Bervoets L.	Environmental research	10.1016/j.envres.2020.110299
Prenatal and childhood exposure to per- and polyfluoroalkyl substances (PFAS) and child executive function and behavioral problems	Harris MH, Oken E, Rifas-Shiman SL, Calafat AM, Bellinger DC, Webster TF, White RF, Sagiv SK.	Environmental research	10.1016/j.envres.2021.111621
Prenatal and childhood exposure to per-/polyfluoroalkyl substances (PFASs) and its associations with childhood overweight and/or obesity: a systematic review with meta-analyses	Frigerio G, Ferrari CM, Fustinoni S.	Environmental health : a global access science source	10.1186/s12940-023-01006-6
Prenatal and childhood exposure to poly- and perfluoroalkyl substances (PFAS) and cognitive development in children at age 8 years	Vuong AM, Yolton K, Xie C, Dietrich KN, Braun JM, Webster GM, Calafat AM, Lanphear BP, Chen A.	Environmental research	10.1016/j.envres.2019.02.025
Prenatal and early postnatal exposure to perfluoroalkyl substances and bone mineral content and density in the Odense Child Cohort	Højsager FD, Sigvaldsen A, Andersen MS, Juul A, Nielsen F, Möller S, Christesen HBT, Grøntved A, Grandjean P, Jensen TK.	Environment international	10.1016/j.envint.2023.108264
Prenatal and early postnatal exposure to perfluoroalkyl substances and bone mineral content and density in the Odense child cohort	Højsager FD, Andersen M, Juul A, Nielsen F, Möller S, Christensen HT, Grøntved A, Grandjean P, Jensen TK.	Environment international	10.1016/j.envint.2022.107417
Prenatal and Early Postnatal Exposure to Persistent Organic Pollutants (POPs): What Is the Correlation between Dioxins and Long-Chain Per- and Polyfluorinated Alkyl Substances (PFAS)?	Abraham K.	Environmental health perspectives	10.1289/EHP13313
Prenatal and postnatal exposure to PFAS and cardiometabolic factors and inflammation status in children from six European cohorts	Papadopoulou E, Stratakis N, Basagaña X, Brantsæter AL, Casas M, Fossati S, Gražulevičienė R, Småstuen Haug L, Heude B, Maitre L, McEachan RRC, Robinson O, Roumeliotaki T, Sabidó E, Borràs E, Urquiza J, Vafeiadi M, Zhao Y, Slama R, Wright J, Conti DV, Vrijheid M, Chatzi L.	Environment international	10.1016/j.envint.2021.106853
Prenatal exposure to 11 perfluoroalkyl substances and fetal growth: A large-scale, prospective birth cohort study	Kashino I, Sasaki S, Okada E, Matsuura H, Goudarzi H, Miyashita C, Okada E, Ito YM, Araki A, Kishi R.	Environment international	10.1016/j.envint.2019.105355
Prenatal Exposure to an EDC Mixture, NeuroMix: Effects on Brain, Behavior, and Stress Responsiveness in Rats	Gore AC, Moore T, Groom MJ, Thompson LM.	Toxics	10.3390/toxics10030122
Prenatal exposure to chlorinated polyfluoroalkyl ether sulfonic acids and perfluoroalkyl acids: Potential role of maternal determinants and associations with birth outcomes	Xu C, Yin S, Liu Y, Chen F, Zhong Z, Li F, Liu K, Liu W.	Journal of hazardous materials	10.1016/j.jhazmat.2019.120867
Prenatal exposure to endocrine disrupting chemical mixtures and infant birth weight: A Bayesian analysis using kernel machine regression	Hu JMY, Arbuckle TE, Janssen P, Lanphear BP, Zhuang LH, Braun JM, Chen A, McCandless LC.	Environmental research	10.1016/j.envres.2021.110749
Prenatal exposure to endocrine-disrupting chemicals and thyroid function in neonates: A systematic review and meta-analysis	Sun M, Cao X, Wu Y, Shen L, Wei G.	Ecotoxicology and environmental safety	10.1016/j.ecoenv.2022.113215
Prenatal exposure to hexafluoropropylene oxide trimer acid (HFPO-TA) disrupts the maternal gut microbiome and fecal metabolome homeostasis	Shi G, Zhu B, Wu Q, Dai J, Sheng N.	The Science of the total environment	10.1016/j.scitotenv.2023.169330
Prenatal Exposure to Legacy and Alternative Per- and Polyfluoroalkyl Substances and Neuropsychological Development Trajectories over the First 3 Years of Life	Li QQ, Huang J, Cai D, Chou WC, Zeeshan M, Chu C, Zhou Y, Lin L, Ma HM, Tang C, Kong M, Xie Y, Dong GH, Zeng XW.	Environmental science & technology	10.1021/acs.est.2c07807
Prenatal exposure to legacy PFAS and neurodevelopment in preschool-aged Canadian children: The MIREC cohort	Goodman CV, Till C, Green R, El-Sabbagh J, Arbuckle TE, Hornung R, Lanphear B, Seguin JR, Booij L, Fisher M, Muckle G, Bouchard MF, Ashley-Martin J.	Neurotoxicology and teratology	10.1016/j.ntt.2023.107181
Prenatal Exposure to Multiple Endocrine-Disrupting Chemicals and Childhood BMI Trajectories in the INMA Cohort Study	Montazeri P, Güil-Oumrait N, Marquez S, Cirugeda L, Beneito A, Guxens M, Lertxundi A, Lopez-Espinosa MJ, Santa-Marina L, Sunyer J, Casas M, Vrijheid M.	Environmental health perspectives	10.1289/EHP11103
Prenatal exposure to per- and polyfluoroalkyl substances (PFAS) and associations with attention-deficit/hyperactivity disorder and autism spectrum disorder in children	Skogheim TS, Weyde KVF, Aase H, Engel SM, Surén P, Øie MG, Biele G, Reichborn-Kjennerud T, Brantsæter AL, Haug LS, Sabaredzovic A, Auyeung B, Villanger GD.	Environmental research	10.1016/j.envres.2021.111692
Prenatal exposure to per- and polyfluoroalkyl substances (PFAS) and neurobehavior in US children through 8 years of age: The HOME study	Vuong AM, Webster GM, Yolton K, Calafat AM, Muckle G, Lanphear BP, Chen A.	Environmental research	10.1016/j.envres.2021.110825
Prenatal exposure to Per- and polyfluoroalkyl substances and adiposity measures of children at 4 and 6 years: A prospective birth cohort in China	Sun S, Xie Z, Song X, Wen S, Yuan W, Miao M, Ji H, Liang H.	Ecotoxicology and environmental safety	10.1016/j.ecoenv.2023.115751
Prenatal Exposure to Per- and Polyfluoroalkyl Substances and Child Growth Trajectories in the First Two Years	Gao Y, Luo J, Zhang Y, Pan C, Ren Y, Zhang J, Tian Y; Shanghai Birth Cohort.	Environmental health perspectives	10.1289/EHP9875
Prenatal exposure to per- and polyfluoroalkyl substances and cognitive development in infancy and toddlerhood	Oh J, Schmidt RJ, Tancredi D, Calafat AM, Roa DL, Hertz-Picciotto I, Shin HM.	Environmental research	10.1016/j.envres.2021.110939
Prenatal exposure to per- and polyfluoroalkyl substances and DNA methylation in the placenta: A prospective cohort study	Xie Z, Sun S, Ji H, Miao M, He W, Song X, Cao W, Wu Q, Liang H, Yuan W.	Journal of hazardous materials	10.1016/j.jhazmat.2023.132845
Prenatal exposure to per- and polyfluoroalkyl substances and infant sleep disturbance: A prospective cohort study	Huang Y, Fang F, Chen Y, He X, Chen Q, Wang H, Zhang J; Shanghai Birth Cohort.	Environment international	10.1016/j.envint.2023.108070
Prenatal exposure to per- and polyfluoroalkyl substances and maternal and neonatal thyroid function in the Project Viva Cohort: A mixtures approach	Preston EV, Webster TF, Claus Henn B, McClean MD, Gennings C, Oken E, Rifas-Shiman SL, Pearce EN, Calafat AM, Fleisch AF, Sagiv SK.	Environment international	10.1016/j.envint.2020.105728
Prenatal exposure to per- and polyfluoroalkyl substances and pregnancy outcome in Austria	Kaiser AM, Forsthuber M, Widhalm R, Granitzer S, Weiss S, Zeisler H, Foessleitner P, Salzer H, Grasl-Kraupp B, Moshammer H, Hartmann C, Uhl M, Gundacker C.	Ecotoxicology and environmental safety	10.1016/j.ecoenv.2023.115006
Prenatal exposure to per- and polyfluoroalkyl substances in association with autism spectrum disorder in the MARBLES study	Oh J, Bennett DH, Calafat AM, Tancredi D, Roa DL, Schmidt RJ, Hertz-Picciotto I, Shin HM.	Environment international	10.1016/j.envint.2020.106328
Prenatal exposure to per- and polyfluoroalkyl substances, fetal thyroid hormones, and infant neurodevelopment	Yao Q, Vinturache A, Lei X, Wang Z, Pan C, Shi R, Yuan T, Gao Y, Tian Y.	Environmental research	10.1016/j.envres.2021.112561
Prenatal exposure to perfluoroalkyl substances and associations with symptoms of attention-deficit/hyperactivity disorder and cognitive functions in preschool children	Skogheim TS, Villanger GD, Weyde KVF, Engel SM, Surén P, Øie MG, Skogan AH, Biele G, Zeiner P, Øvergaard KR, Haug LS, Sabaredzovic A, Aase H.	International journal of hygiene and environmental health	10.1016/j.ijheh.2019.10.003
Prenatal exposure to perfluoroalkyl substances and behavioral difficulties in childhood at 7 and 11 years	Luo J, Xiao J, Gao Y, Ramlau-Hansen CH, Toft G, Li J, Obel C, Andersen SL, Deziel NC, Tseng WL, Inoue K, Bonefeld-Jørgensen EC, Olsen J, Liew Z.	Environmental research	10.1016/j.envres.2020.110111
Prenatal Exposure to Perfluoroalkyl Substances and Cognitive and Neurobehavioral Development in Children at 6 Years of Age	Xie Z, Liang H, Miao M, Wang Z, Chen Y, Yang L, Zhou Y, Cao W, Yuan W.	Environmental science & technology	10.1021/acs.est.2c06535
Prenatal exposure to perfluoroalkyl substances and cord plasma lipid concentrations	Tian Y, Miao M, Ji H, Zhang X, Chen A, Wang Z, Yuan W, Liang H.	Environmental pollution (Barking, Essex : 1987)	10.1016/j.envpol.2020.115426
Prenatal exposure to perfluoroalkyl substances modulates neonatal serum phospholipids, increasing risk of type 1 diabetes	McGlinchey A, Sinioja T, Lamichhane S, Sen P, Bodin J, Siljander H, Dickens AM, Geng D, Carlsson C, Duberg D, Ilonen J, Virtanen SM, Dirven H, Berntsen HF, Zimmer K, Nygaard UC, Orešič M, Knip M, Hyötyläinen T.	Environment international	10.1016/j.envint.2020.105935
Prenatal exposure to perfluoroalkyl substances, immune-related outcomes, and lung function in children from a Spanish birth cohort study	Manzano-Salgado CB, Granum B, Lopez-Espinosa MJ, Ballester F, Iñiguez C, Gascón M, Martínez D, Guxens M, Basterretxea M, Zabaleta C, Schettgen T, Sunyer J, Vrijheid M, Casas M.	International journal of hygiene and environmental health	10.1016/j.ijheh.2019.06.005
Prenatal exposure to perfluorodecanoic acid is associated with lower circulating concentration of adrenal steroid metabolites during mini puberty in human female infants. The Odense Child Cohort	Jensen RC, Glintborg D, Gade Timmermann CA, Nielsen F, Kyhl HB, Frederiksen H, Andersson AM, Juul A, Sidelmann JJ, Andersen HR, Grandjean P, Andersen MS, Jensen TK.	Environmental research	10.1016/j.envres.2019.109101
Prenatal exposure to perfluorooctane sulfonate alternatives and associations with neonatal thyroid stimulating hormone concentration: A birth cohort study	Cao Z, Li J, Yang M, Gong H, Xiang F, Zheng H, Cai X, Xu S, Zhou A, Xiao H.	Chemosphere	10.1016/j.chemosphere.2022.136940
Prenatal exposure to persistent organic pollutants and changes in infant growth and childhood growth trajectories	Cai A, Portengen L, Govarts E, Martin LR, Schoeters G, Legler J, Vermeulen R, Lenters V, Remy S.	Chemosphere	10.1016/j.chemosphere.2022.137695
Prenatal exposure to persistent organic pollutants and childhood obesity: A systematic review and meta-analysis of human studies	Stratakis N, Rock S, La Merrill MA, Saez M, Robinson O, Fecht D, Vrijheid M, Valvi D, Conti DV, McConnell R, Chatzi VL.	Obesity reviews : an official journal of the International Association for the Study of Obesity	10.1111/obr.13383
Prenatal exposure to PFOS and PFOA in a pregnant women cohort of Catalonia, Spain	Rovira J, Martínez MÁ, Sharma RP, Espuis T, Nadal M, Kumar V, Costopoulou D, Vassiliadou I, Leondiadis L, Domingo JL, Schuhmacher M.	Environmental research	10.1016/j.envres.2019.05.040
Prenatal exposure to poly- and perfluoroalkyl substances and the incidence of asthma in early childhood	Zell-Baran LM, Venter C, Dabelea D, Norris JM, Glueck DH, Adgate JL, Brown JM, Calafat AM, Pickett-Nairne K, Starling AP.	Environmental research	10.1016/j.envres.2023.117311
Prenatal exposure to replacement flame retardants and organophosphate esters and childhood adverse respiratory outcomes	Mendy A, Percy Z, Braun JM, Lanphear B, La Guardia MJ, Hale RC, Yolton K, Chen A.	Environmental research	10.1016/j.envres.2023.117523
Prenatal exposures to mixtures of endocrine disrupting chemicals and children's weight trajectory up to age 5.5 in the SELMA study	Svensson K, Tanner E, Gennings C, Lindh C, Kiviranta H, Wikström S, Bornehag CG.	Scientific reports	10.1038/s41598-021-89846-5
Prenatal per- and polyfluoroalkyl substances (PFAS) exposure in relation to preterm birth subtypes and size-for-gestational age in the LIFECODES cohort 2006-2008	Siwakoti RC, Cathey A, Ferguson KK, Hao W, Cantonwine DE, Mukherjee B, McElrath TF, Meeker JD.	Environmental research	10.1016/j.envres.2023.116967
Prenatal perfluoroalkyl substance exposure and neuropsychological development throughout childhood: The INMA Project	Carrizosa C, Murcia M, Ballesteros V, Costa O, Manzano-Salgado CB, Ibarluzea J, Iñiguez C, Casas M, Andiarena A, Llop S, Lertxundi A, Schettgen T, Sunyer J, Ballester F, Vrijheid M, Lopez-Espinosa MJ.	Journal of hazardous materials	10.1016/j.jhazmat.2021.125185
Prenatal perfluoroalkyl substances exposure and neurodevelopment in toddlers: Findings from SMBCS	Zhang B, Wang Z, Zhang J, Dai Y, Feng C, Lin Y, Zhang L, Guo J, Qi X, Chang X, Lu D, Wu C, Zhou Z.	Chemosphere	10.1016/j.chemosphere.2022.137587
Prenatal perfluorooctanoic acid exposure and glutathione s-transferase T1/M1 genotypes and their association with atopic dermatitis at 2 years of age	Wen HJ, Wang SL, Chen PC, Guo YL.	PloS one	10.1371/journal.pone.0210708
Prenatal perfluorooctanoic acid exposure is associated with early onset atopic dermatitis in 5-year-old children	Wen HJ, Wang SL, Chuang YC, Chen PC, Guo YL.	Chemosphere	10.1016/j.chemosphere.2019.05.100
Prenatal PFAS and psychosocial stress exposures in relation to fetal growth in two pregnancy cohorts: Applying environmental mixture methods to chemical and non-chemical stressors	Eick SM, Enright EA, Padula AM, Aung M, Geiger SD, Cushing L, Trowbridge J, Keil AP, Gee Baek H, Smith S, Park JS, DeMicco E, Schantz SL, Woodruff TJ, Morello-Frosch R.	Environment international	10.1016/j.envint.2022.107238
Prepandemic personal concentrations of per- and polyfluoroalkyl substances (PFAS) and other pollutants: Specific and combined effects on the incidence of COVID-19 disease and SARS-CoV-2 infection	Pumarega J, Gasull M, Koponen J, Campi L, Rantakokko P, Henríquez-Hernández LA, Aguilar R, Donat-Vargas C, Zumbado M, Villar-García J, Rius C, Santiago-Díaz P, Vidal M, Jimenez A, Iglesias M, Dobaño C, Moncunill G, Porta M.	Environmental research	10.1016/j.envres.2023.116965
Prevalence and Implications of Per- and Polyfluoroalkyl Substances (PFAS) in Settled Dust	Savvaides T, Koelmel JP, Zhou Y, Lin EZ, Stelben P, Aristizabal-Henao JJ, Bowden JA, Godri Pollitt KJ.	Current environmental health reports	10.1007/s40572-021-00326-4
Prevalence and Source Tracing of PFAS in Shallow Groundwater Used for Drinking Water in Wisconsin, USA	Silver M, Phelps W, Masarik K, Burke K, Zhang C, Schwartz A, Wang M, Nitka AL, Schutz J, Trainor T, Washington JW, Rheineck BD.	Environmental science & technology	10.1021/acs.est.3c02826
Probabilistic human health risk assessment of perfluorooctane sulfonate (PFOS) by integrating in vitro, in vivo toxicity, and human epidemiological studies using a Bayesian-based dose-response assessment coupled with physiologically based pharmacokinetic (PBPK) modeling approach	Chou WC, Lin Z.	Environment international	10.1016/j.envint.2020.105581
Probing the hepatotoxicity mechanisms of novel chlorinated polyfluoroalkyl sulfonates to zebrafish larvae: Implication of structural specificity	Yi S, Chen P, Yang L, Zhu L.	Environment international	10.1016/j.envint.2019.105262
Probing the Interactions of Perfluorocarboxylic Acids of Various Chain Lengths with Human Serum Albumin: Calorimetric and Spectroscopic Investigations	Crisalli AM, Cai A, Cho BP.	Chemical research in toxicology	10.1021/acs.chemrestox.3c00011
Probing the single and combined toxicity of PFOS and Cr(VI) to soil bacteria and the interaction mechanisms	Li J, Zheng T, Yuan D, Gao C, Liu C.	Chemosphere	10.1016/j.chemosphere.2020.126039
Profiling biotoxicities of hexafluoropropylene oxide trimer acid with human embryonic stem cell-based assays	Liang S, Liang G, Zhang Y, Zhang X, Zhong L.	Journal of environmental sciences (China)	10.1016/j.jes.2021.08.012
Progress in the application of ionic liquids and deep eutectic solvents for the separation and quantification of per- and polyfluoroalkyl substances	Ishtaweera P, Baker GA.	Journal of hazardous materials	10.1016/j.jhazmat.2023.132959
Properties and Mechanisms for PFAS Adsorption to Aqueous Clay and Humic Soil Components	Luft CM, Schutt TC, Shukla MK.	Environmental science & technology	10.1021/acs.est.2c00499
Property Estimation of Per- and Polyfluoroalkyl Substances: A Comparative Assessment of Estimation Methods	Lampic A, Parnis JM.	Environmental toxicology and chemistry	10.1002/etc.4681
Proteomics and lipidomics analyses reveal modulation of lipid metabolism by perfluoroalkyl substances in liver of Atlantic cod (Gadus morhua)	Dale K, Yadetie F, Müller MB, Pampanin DM, Gilabert A, Zhang X, Tairova Z, Haarr A, Lille-Langøy R, Lyche JL, Porte C, Karlsen OA, Goksøyr A.	Aquatic toxicology (Amsterdam, Netherlands)	10.1016/j.aquatox.2020.105590
Public health evaluation of PFAS exposures and breastfeeding: a systematic literature review	Hoadley L, Watters M, Rogers R, Siegmann Werner L, Markiewicz KV, Forrester T, McLanahan ED.	Toxicological sciences : an official journal of the Society of Toxicology	10.1093/toxsci/kfad053
Pulmonary exposure of mice to ammonium perfluoro(2-methyl-3-oxahexanoate) (GenX) suppresses the innate immune response to carbon black nanoparticles and stimulates lung cell proliferation	Lee HY, You DJ, Taylor-Just AJ, Linder KE, Atkins HM, Ralph LM, De la Cruz G, Bonner JC.	Inhalation toxicology	10.1080/08958378.2022.2086651
Purine metabolism-related genes and immunization in thyroid eye disease were validated using bioinformatics and machine learning	Wu Z, Gao Y, Cao L, Peng Q, Yao X.	Scientific reports	10.1038/s41598-023-45048-9
Pyrolysis processing of PFAS-impacted biosolids, a pilot study	Thoma ED, Wright RS, George I, Krause M, Presezzi D, Villa V, Preston W, Deshmukh P, Kauppi P, Zemek PG.	Journal of the Air & Waste Management Association (1995)	10.1080/10962247.2021.2009935
QSPR-based prediction of air-water interfacial adsorption coefficients for nonionic PFAS with large headgroups	Brusseau ML.	Chemosphere	10.1016/j.chemosphere.2023.139960
Quantification of contaminant mass discharge from point sources in aquitard/aquifer systems based on vertical concentration profiles and 3D modeling	Mosthaf K, Rosenberg L, Broholm MM, Fjordbøge AS, Lilbæk G, Christensen AG, Bjerg PL.	Journal of contaminant hydrology	10.1016/j.jconhyd.2023.104281
Quantifying the impact of PFOA exposure on B-cell development and antibody production	Taylor KD, Woodlief TL, Ahmed A, Hu Q, Duncker PC, DeWitt JC.	Toxicological sciences : an official journal of the Society of Toxicology	10.1093/toxsci/kfad043
Quantitative bias analysis of the association between subclinical thyroid disease and two perfluoroalkyl substances in a single study	Dzierlenga MW, Moreau M, Song G, Mallick P, Ward PL, Campbell JL, Housand C, Yoon M, Allen BC, Clewell HJ 3rd, Longnecker MP.	Environmental research	10.1016/j.envres.2019.109017
Quantitative Chemical Proteomics Reveals Interspecies Variations on Binding Schemes of L-FABP with Perfluorooctanesulfonate	Han J, Fu J, Sun J, Hall DR, Yang D, Blatz D, Houck K, Ng C, Doering J, LaLone C, Peng H.	Environmental science & technology	10.1021/acs.est.1c00509
Quantitative Cross-Species Comparison of Serum Albumin Binding of Per- and Polyfluoroalkyl Substances from Five Structural Classes	Starnes HM, Jackson TW, Rock KD, Belcher SM.		10.1101/2023.11.10.566613
Quantitative relationships of perfluoroalkyl acids in drinking water associated with serum concentrations above background in adults living near contamination hotspots in Sweden	Johanson G, Gyllenhammar I, Ekstrand C, Pyko A, Xu Y, Li Y, Norström K, Lilja K, Lindh C, Benskin JP, Georgelis A, Forsell K, Jakobsson K, Glynn A, Vogs C.	Environmental research	10.1016/j.envres.2022.115024
Querying the In Vitro Proteome Cysteine Reactivity of 8:2 Fluorotelomer Acrylate	Hall DR, Gauthier J, Peng H.	Environmental science & technology	10.1021/acs.est.3c02930
[truncated: 358 more rows]

## Sheet: Scopus
((TITLE-ABS ("toxicity") OR TITLE-ABS ("toxicology") OR TITLE-ABS ("chemoinformatics") OR TITLE-ABS ("cheminformatics") OR TITLE-ABS ("QSAR") OR TITLE-ABS ("QSPR") OR TITLE-ABS ("machine learning") OR TITLE-ABS ("modeling")) AND (TITLE-ABS ("PFAS") OR TITLE-ABS ("PFOA") OR TITLE-ABS ("PFOS")) AND ( PUBYEAR > 2019 AND PUBYEAR < 2023 ) AND PUBYEAR > 2019 AND PUBYEAR < 2023 AND PUBYEAR > 2019 AND PU…
[truncated: 1,716 more rows]

[truncated: 6 more sheets: ACS, All_Metadata, Records Screened, New Records, Included, PFAS Frequency-Categories]
